# Supplementary material for: Genome-wide association meta-analysis of corneal curvature identifies novel loci and shared genetic influences across axial length and refractive error
Source: Commun Biol. 2020 Mar 19;3:133. doi: 10.1038/s42003-020-0802-y (PMC7081241; doi:10.1038/s42003-020-0802-y)
Supplement: Supplementary file 3 — Supplementary Data 1 [file 42003_2020_802_MOESM3_ESM.xlsx]

## Sheet: Sheet 1
GWAS hits for corneal curvature by age group
					All			Age ≥ 25 (n=35,422)				Age < 25 (n=8,620)
SNP	CHR	POS	GENE	A1/A2	Effect	SE	P	Effect	SE	P	HetPVal	Effect	SE	P	HetPVal
rs3737611	1	11186897	MTOR	A/G	-0.0405	0.0038	2.5e-23	-0.0425	0.0042	2.35467e-22	0.4181	-0.0288	0.0101	0.00501985	0.7441
rs4074961	1	38092723	RSPO1	T/C	0.022	0.0018	1.06e-29	0.0229	0.002	8.02845e-27	0.1563	0.018	0.0043	3.374e-05	0.4964
rs11211514	1	47787954	CMPK1	T/G	-0.0257	0.0037	5.91052e-11	-0.0258	0.0041	1.77458e-09	0.4402	-0.0254	0.0089	0.00521568	0.1944
rs945170	1	62867483	USP1	T/G	-0.0138	0.0019	1.61e-11	-0.0137	0.0021	1.20527e-09	0.1098	-0.014	0.0044	0.00178646	0.1115
rs1548942	2	217619036	IGFBP5/TNP1	T/C	0.016	0.0024	4.23e-10	0.0148	0.0027	2.16169e-07	0.8382	0.0212	0.0054	0.00012806	0.3808
rs2245601	2	233390937	CHRND	A/G	-0.0138	0.0019	1.1e-11	-0.0119	0.0021	1.06555e-07	0.6387	-0.0211	0.0043	1.29178e-06	0.7587
rs2630445	3	13554886	HDAC11/FBLN2	T/G	0.0302	0.0036	1.17e-15	0.0291	0.004	4.00911e-12	0.3162	0.0349	0.0073	2.75846e-06	0.8485
rs485554	3	172137343	FNDC3B/GHSR	C/G	-0.0124	0.0019	1.01e-09	-0.0119	0.0022	1.4707e-07	0.2385	-0.0142	0.0042	0.000823313	0.05894
rs10663094	3	181363464	SOX2	ACT/A	0.0119	0.002	9.82e-09	0.0146	0.0021	7.00023e-11	0.9399	NA	NA	NA	NA
rs16896276	4	18015156	LCORL	A/T	0.0141	0.0021	1.74e-10	0.0143	0.0024	8.55983e-09	0.9745	0.0133	0.0044	0.00296737	0.4351
rs1800813	4	55094467	PDGFRA	A/G	-0.0226	0.0022	6.44e-23	-0.0218	0.0024	1.4128e-17	0.002831	-0.0258	0.0048	1.13633e-07	0.8041
rs7657200	4	73473151	ADAMTS3	A/G	0.0129	0.002	6.5e-10	0.0131	0.0022	9.1797e-09	0.8085	0.012	0.0047	0.0128804	0.6378
rs6831679	4	128113424	RP11-125O18.1	A/G	0.0131	0.0019	9.78e-11	0.0129	0.0021	7.74858e-09	0.5881	0.0137	0.0043	0.00172244	0.847
rs11740254	5	64319640	CWC27/ADAMTS6	I/R	0.0127	0.0021	1.55e-08	-0.0124	0.0022	5.02434e-08	0.898	-0.0069	0.0041	0.0959674	0.7224
rs13180294	5	79360175	THBS4	A/G	-0.0267	0.0038	3.37e-11	-0.024	0.0043	1.01062e-07	0.4253	-0.0363	0.0082	1.23794e-05	0.6029
rs7708378	5	129088784	ADAMTS19/CHSY3	T/G	0.028	0.0044	2.49e-09	0.0241	0.0047	1.17153e-06	0.4603	0.0413	0.0089	4.79322e-06	0.681
rs67612840	6	10028826	OFCC1	A/T	-0.0131	0.002	8.26e-10	-0.0117	0.0022	8.32665e-07	0.4412	-0.0188	0.0045	3.93198e-05	0.4282
rs9366426	6	22064639	CASC15	T/C	0.0134	0.002	4.42e-10	0.0128	0.0023	8.91899e-08	0.2424	0.0152	0.0043	0.000558743	0.0433
rs961755	6	113443139	U6	T/G	0.0125	0.0021	2.49e-08	0.0115	0.0024	3.41614e-06	0.7733	0.0162	0.0047	0.00071768	0.7008
rs4620141	6	138869568	NHSL1	T/C	-0.0136	0.0019	1.12e-11	-0.0123	0.0021	4.18856e-08	0.3026	-0.0187	0.0041	8.77666e-06	0.1647
rs12702376	7	47775053	HUS1	C/G	-0.0277	0.0029	3.52e-19	-0.0278	0.0033	8.45627e-16	0.2425	-0.027	0.0063	2.52778e-05	0.3435
rs7004112	8	78941331	RP11-91P17.1	T/G	-0.0128	0.0018	4.2e-11	-0.0126	0.0021	5.83776e-09	0.2687	-0.0135	0.004	0.000887266	0.4691
rs4837104	9	129433929	LMX1B	A/G	0.0219	0.0034	7.35e-10	0.0227	0.0036	2.66165e-09	0.8243	0.0171	0.0088	0.0569831	0.9432
rs3132309	9	137433436	COL5A1	A/C	-0.0137	0.002	2.27e-10	-0.0142	0.0022	1.71702e-09	0.3259	-0.0114	0.005	0.0236542	0.7796
rs11204213	10	48388228	RBP3	T/C	0.0706	0.0097	9.83e-13	0.0681	0.0103	3.29868e-10	0.6432	NA	NA	NA	NA
rs166976	10	90024599	RNLS	A/G	-0.0157	0.0021	2.47e-12	-0.0156	0.0023	1.97148e-10	0.4666	-0.0157	0.0049	0.00159066	0.2061
rs10786330	10	99074959	FRAT1	A/C	0.012	0.0019	1.22e-09	0.0127	0.0021	9.4353e-09	0.9516	0.0095	0.0041	0.0211047	0.8276
rs807037	10	102824349	KAZALD1	C/G	-0.0153	0.002	1.43e-13	-0.0148	0.0022	5.57853e-11	0.5833	-0.0178	0.0047	0.000212217	0.4873
rs7948458	11	2172830	INS	A/C	-0.014	0.0021	4.9e-10	-0.0153	0.0023	4.88983e-10	0.01031	-0.0079	0.0051	0.126251	0.1895
rs11181913	12	43574200	RP11-118A3.1	A/G	0.0192	0.0033	3.3e-08	0.0164	0.0037	3.1179e-05	0.7358	0.0285	0.0068	3.78188e-05	0.4761
rs10748027	12	66387621	HMGA2	A/T	0.0185	0.0026	2.28e-11	0.016	0.003	2.3469e-07	0.7653	0.0276	0.0056	1.50434e-06	0.8689
rs9506725	13	22314146	FGF9	T/C	0.019	0.0024	3.07e-14	0.0197	0.0027	2.39389e-12	0.7074	0.0156	0.0046	0.000936589	0.1302
rs9316971	13	22980191	SNORD36	T/C	-0.0129	0.0021	3.21e-09	-0.0128	0.0023	9.23038e-08	0.3549	-0.0135	0.0048	0.00595647	0.004641
rs7327381	13	52006645	INTS6	T/C	0.014	0.0018	8.06e-13	0.0138	0.0021	3.23327e-10	0.833	0.0148	0.004	0.00024589	0.4588
rs75772222	14	25447080	STXBP6	T/C	0.0213	0.003	1.28e-11	0.0226	0.0033	1.27745e-10	0.8806	0.0165	0.0065	0.0123988	0.9903
rs4083463	14	81856323	STON2	A/G	0.0118	0.0019	7.92e-09	0.0117	0.0022	3.09979e-07	0.3431	0.0122	0.0042	0.00429064	0.4084
rs9806595	15	48755168	FBN1	T/C	-0.012	0.002	2.23e-08	-0.0133	0.0023	2.40592e-08	0.5561	-0.0069	0.0046	0.13852	0.7916
rs4887113	15	79095287	ADAMTS7	T/C	0.0162	0.0023	2.57e-11	0.0164	0.0025	6.59259e-10	0.6153	0.0156	0.0056	0.00608972	0.7723
rs184926585	18	32643292	MAPRE2	T/C	-0.0201	0.0034	3.61e-08	-0.0217	0.0039	1.02015e-07	0.5873	-0.0142	0.0076	0.0654745	0.7971
rs6064518	20	55821046	BMP7	T/G	0.017	0.0022	3.47e-13	0.0172	0.0025	7.40918e-11	0.6693	0.0163	0.0046	0.000495119	0.715
rs13050142	21	47427165	COL6A1	T/C	-0.0166	0.0023	1.86e-11	-0.0183	0.0026	4.17403e-11	0.9828	-0.0105	0.005	0.0383174	0.6436
