# Supplementary material for: Genome-wide association meta-analysis of corneal curvature identifies novel loci and shared genetic influences across axial length and refractive error
Source: Commun Biol. 2020 Mar 19;3:133. doi: 10.1038/s42003-020-0802-y (PMC7081241; doi:10.1038/s42003-020-0802-y)
Supplement: Supplementary file 4 — Supplementary Data 2 [file 42003_2020_802_MOESM4_ESM.xlsx]

## Sheet: sheet1
Supplementary Table 4. Annotation and function characterization of variants in LD at the 41 loci
Query SNP: rs3737611 and variants with r2 >= 0.8
pos (hg19)	pos (hg38)	LD	LD	variant	Ref	Alt	AFR	AMR	ASN	EUR	SiPhy	Promoter	Enhancer	DNAse	Proteins	eQTL	Motifs	Drivers	GENCODE	dbSNP
		(r²)	(D')				freq	freq	freq	freq	cons	histone marks	histone marks		bound	tissues	changed	disrupted	genes	func annot
chr1:11110601	chr1:11050544	0.81	0.95	rs111597920	T	C	0.33	0.12	0.16	0.03							Foxm1,SIX5,Znf143		3.3kb 5' of MASP2
chr1:11110964	chr1:11050907	0.89	0.95	rs112818343	C	A	0.28	0.11	0.16	0.03							4 altered motifs		3.7kb 5' of MASP2
chr1:11111153	chr1:11051096	0.89	1	rs12143364	G	C	0	0.02	0.05	0.02			SKIN				AP-1,Sox		3.5kb 3' of SRM
chr1:11111629	chr1:11051572	0.89	0.95	rs12121344	C	T	0.23	0.1	0.15	0.03		SKIN	8 organs				5 altered motifs		3kb 3' of SRM
chr1:11112037	chr1:11051980	0.89	0.95	rs12122254	C	T	0.08	0.06	0.12	0.03		BLD, SKIN	11 organs	12 organs	4 bound proteins		PRDM1,Sox		2.6kb 3' of SRM
chr1:11112167	chr1:11052110	0.89	0.95	rs12144405	G	A	0.31	0.11	0.15	0.03		BLD, SKIN	11 organs	4 organs	ELF1,GABP		Mef2,SIX5		2.5kb 3' of SRM
chr1:11113047	chr1:11052990	0.89	0.95	rs12117813	C	G	0.23	0.11	0.16	0.03		IPSC, SKIN	16 organs	9 organs	7 bound proteins		CEBPB,Foxa,TCF12		1.6kb 3' of SRM
chr1:11113076	chr:	0.89	0.95	rs140523558	GGGCC	G	0.24	0.11	0.15	0.03		IPSC, SKIN	16 organs	12 organs	9 bound proteins		AP-4,TAL1		1.6kb 3' of SRM
chr1:11113231	chr1:11053174	0.89	0.95	rs12137285	T	C	0.23	0.11	0.15	0.03		IPSC, SKIN	17 organs	11 organs	5 bound proteins				1.4kb 3' of SRM
chr1:11113850	chr1:11053793	0.89	0.95	rs12137519	T	A	0.24	0.11	0.15	0.03			14 organs	ESC,IPSC	POL2		INSM1		790bp 3' of SRM
chr1:11114940	chr1:11054883	0.89	0.95	rs13616	G	T	0.23	0.11	0.15	0.03			5 organs	ESC,LIV			AP-2,Egr-1,SETDB1		SRM	synonymous
chr1:11117381	chr1:11057324	0.89	0.95	rs111454490	T	TTTTA	0.27	0.12	0.14	0.03			4 organs				18 altered motifs		SRM	intronic
chr1:11117496	chr1:11057439	0.81	0.95	rs12144188	G	A	0.24	0.11	0.15	0.03			4 organs				6 altered motifs		SRM	intronic
chr1:11117534	chr1:11057477	0.89	0.95	rs12141640	T	G	0.22	0.11	0.15	0.03			4 organs				10 altered motifs		SRM	intronic
chr1:11117651	chr1:11057594	0.89	0.95	rs12122160	C	T	0.09	0.06	0.12	0.03			6 organs	ESC,IPSC			TR4		SRM	intronic
chr1:11119177	chr1:11059120	0.95	1	rs743576	C	T	0.29	0.12	0.15	0.03		23 organs	10 organs	ESDR			Hsf		SRM	intronic
chr1:11120679	chr1:11060622	0.95	1	rs72870077	C	A	0.27	0.12	0.15	0.03		23 organs	SPLN	30 organs					597bp 5' of SRM
chr1:11122067	chr1:11062010	0.95	1	rs3753237	T	C	0.12	0.07	0.12	0.03		SKIN, BRN, BLD	12 organs	ESDR,LIV	CTCF		HNF1		2kb 5' of SRM
chr1:11123961	chr1:11063904	0.95	1	rs111481680	G	C	0.3	0.12	0.16	0.03			BLD, SKIN, BRN		CTCF		4 altered motifs		2.7kb 3' of EXOSC10
chr1:11124689	chr1:11064632	0.95	1	rs10864489	T	C	0.11	0.06	0.13	0.03							7 altered motifs		2kb 3' of EXOSC10
chr1:11126697	chr1:11066640	0.95	1	rs41274498	G	C	0	0.02	0.05	0.02			BRST				4 altered motifs		EXOSC10	3'-UTR
chr1:11126848	chr1:11066791	0.95	1	rs41274502	T	C	0.11	0.06	0.13	0.03			BRST				Smad4		EXOSC10	intronic
chr1:11133240	chr1:11073183	0.95	1	rs145867835	A	G	0	0.02	0.05	0.02			BLD				Ets		EXOSC10	intronic
chr1:11133440	chr1:11073383	0.95	1	rs143781748	C	T	0.02	0.02	0.05	0.02			BLD				5 altered motifs		EXOSC10	intronic
chr1:11134494	chr1:11074437	0.95	1	rs12121163	G	C	0.15	0.07	0.13	0.03									EXOSC10	intronic
chr1:11134594	chr1:11074537	0.95	1	rs12118686	T	C	0.15	0.07	0.13	0.03							BDP1,GR,LUN-1		EXOSC10	intronic
chr1:11134670	chr1:11074613	0.95	1	rs12117898	A	G	0.15	0.07	0.13	0.03									EXOSC10	intronic
chr1:11134706	chr1:11074649	0.95	1	rs12121227	G	A	0.15	0.07	0.13	0.03							4 altered motifs		EXOSC10	intronic
chr1:11134749	chr1:11074692	0.95	1	rs12118754	T	C	0.1	0.07	0.13	0.03							E2A,TBX5,ZEB1		EXOSC10	intronic
chr1:11134838	chr1:11074781	0.95	1	rs12118762	T	C	0.15	0.07	0.13	0.03							6 altered motifs		EXOSC10	intronic
chr1:11134942	chr1:11074885	0.95	1	rs12119523	T	C	0.15	0.07	0.13	0.03							NRSF		EXOSC10	intronic
chr1:11135250	chr1:11075193	0.95	1	rs72870086	C	T	0.15	0.07	0.13	0.03							15 altered motifs		EXOSC10	intronic
chr1:11135674	chr1:11075617	0.95	1	rs17036291	A	G	0.15	0.07	0.13	0.03							Hoxa7		EXOSC10	intronic
chr1:11136094	chr1:11076037	0.95	1	rs112320796	C	T	0.14	0.07	0.13	0.03							4 altered motifs		EXOSC10	intronic
chr1:11136206	chr1:11076149	0.95	1	rs112387779	G	C	0.15	0.07	0.13	0.03									EXOSC10	intronic
chr1:11136266	chr1:11076209	0.95	1	rs111318492	A	G	0.26	0.12	0.16	0.03							4 altered motifs		EXOSC10	intronic
chr1:11136512	chr1:11076455	0.95	1	rs17036294	A	G	0.15	0.07	0.13	0.03					CTCF		HDAC2		EXOSC10	intronic
chr1:11136568	chr1:11076511	0.95	1	rs17036295	C	T	0.15	0.07	0.13	0.03					CTCF		Zbtb3		EXOSC10	intronic
chr1:11136815	chr1:11076758	0.95	1	rs72870088	T	C	0.15	0.07	0.13	0.03					GATA2		CHOP::CEBPalpha		EXOSC10	intronic
chr1:11136838	chr1:11076781	0.95	1	rs17036297	A	G	0.15	0.07	0.13	0.03					GATA2		4 altered motifs		EXOSC10	intronic
chr1:11137193	chr1:11077136	0.95	1	rs3737618	T	A,C	0.15	0.07	0.13	0.03									EXOSC10	intronic
chr1:11137294	chr1:11077237	0.95	1	rs3737619	C	T	0.15	0.07	0.13	0.03							CDP,Maf		EXOSC10	intronic
chr1:11137661	chr1:11077604	0.95	1	rs2273339	A	G	0.15	0.07	0.13	0.03			FAT				5 altered motifs		EXOSC10	synonymous
chr1:11138201	chr1:11078144	0.95	1	rs112649098	G	A	0.15	0.07	0.12	0.03			FAT						EXOSC10	intronic
chr1:11138346	chr1:11078289	0.95	1	rs113004832	G	A	0.08	0.06	0.1	0.03			FAT						EXOSC10	intronic
chr1:11138613	chr1:11078556	0.95	1	rs17036304	T	C	0.15	0.07	0.12	0.03			FAT				9 altered motifs		EXOSC10	intronic
chr1:11138641	chr1:11078584	0.95	1	rs75909850	C	A	0.14	0.08	0.12	0.03			FAT				9 altered motifs		EXOSC10	intronic
chr1:11139595	chr1:11079538	0.95	1	rs3737620	C	T	0.15	0.07	0.13	0.03			FAT				E2A,LXR,ZEB1		EXOSC10	intronic
chr1:11139731	chr1:11079674	0.95	1	rs144662222	G	A	0.12	0.07	0.13	0.03			FAT				AP-1		EXOSC10	intronic
chr1:11140131	chr1:11080074	0.95	1	rs3765902	T	C	0.15	0.07	0.13	0.03			4 organs						EXOSC10	intronic
chr1:11140663	chr1:11080606	0.95	1	rs12127601	G	A	0.15	0.07	0.12	0.03			4 organs	4 organs			4 altered motifs		EXOSC10	intronic
chr1:11141030	chr1:11080973	0.95	1	rs2273338	G	C	0.15	0.07	0.13	0.03			SKIN, BRN, GI				HNF1,NF-AT,NF-AT1		EXOSC10	intronic
chr1:11141102	chr1:11081045	0.95	1	rs2273337	A	G	0.15	0.07	0.13	0.03			SKIN, BRN, GI						EXOSC10	intronic
chr1:11141406	chr1:11081349	0.95	1	rs72871405	T	C	0.15	0.07	0.13	0.03			BRST, SKIN				Evi-1		EXOSC10	intronic
chr1:11141754	chr1:11081697	0.95	1	rs12128681	G	A	0.15	0.07	0.12	0.03			SKIN				ZID		EXOSC10	intronic
chr1:11143479	chr1:11083422	0.9	1	rs9660570	T	C	0.15	0.07	0.13	0.03							CACD,Ets,NRSF		EXOSC10	intronic
chr1:11144705	chr1:11084648	0.95	1	rs147923034	T	G	0.13	0.07	0.13	0.03							GCM		EXOSC10	intronic
chr1:11145516	chr1:11085459	0.84	0.94	rs142542473	A	T	0.13	0.06	0.11	0.02							7 altered motifs		EXOSC10	intronic
chr1:11146652	chr1:11086595	0.95	1	rs140436377	A	G	0.13	0.07	0.13	0.03							4 altered motifs		EXOSC10	intronic
chr1:11147241	chr1:11087184	0.95	1	rs12136825	C	T	0.25	0.12	0.16	0.03							HNF4,Pdx1,Vax2		EXOSC10	intronic
chr1:11148388	chr1:11088331	0.95	1	rs201285485	G	GCTT	0.14	0.07	0.12	0.03							4 altered motifs		EXOSC10	intronic
chr1:11148391	chr1:11088334	0.95	1	rs199784066	T	8-mer	0.14	0.07	0.12	0.03									EXOSC10	intronic
chr1:11150026	chr1:11089969	0.95	1	rs72871407	C	T	0.25	0.12	0.16	0.03							Smad4		EXOSC10	intronic
chr1:11150682	chr1:11090625	0.95	1	rs3737621	C	T	0.13	0.07	0.13	0.03									EXOSC10	synonymous
chr1:11151314	chr1:11091257	0.95	1	rs2273336	T	C	0.15	0.07	0.13	0.03							5 altered motifs		EXOSC10	intronic
chr1:11151480	chr1:11091423	0.95	1	rs2273335	T	C	0.1	0.06	0.13	0.03									EXOSC10	intronic
chr1:11152365	chr1:11092308	0.95	1	rs112145252	G	A	0.11	0.06	0.13	0.03							HNF4		EXOSC10	intronic
chr1:11152402	chr1:11092345	0.95	1	rs113242293	A	G	0.15	0.07	0.13	0.03							6 altered motifs		EXOSC10	intronic
chr1:11152523	chr1:11092466	0.95	1	rs78962329	A	G	0.15	0.07	0.13	0.03							5 altered motifs		EXOSC10	intronic
chr1:11153241	chr1:11093184	0.95	1	rs12127428	T	C	0.15	0.07	0.13	0.03							14 altered motifs		EXOSC10	intronic
chr1:11153331	chr1:11093274	0.95	1	rs12126654	A	G	0.13	0.07	0.13	0.03							BCL,Hsf		EXOSC10	intronic
chr1:11153739	chr1:11093682	0.95	1	rs72871414	A	G	0.15	0.07	0.13	0.03							7 altered motifs		EXOSC10	intronic
chr1:11154806	chr1:11094749	0.95	1	rs72470193	T	C	0.15	0.07	0.13	0.03							5 altered motifs		EXOSC10	intronic
chr1:11155663	chr1:11095606	0.95	1	rs12129722	T	C	0.15	0.07	0.13	0.03							BDP1,LUN-1		EXOSC10	intronic
chr1:11156668	chr1:11096611	0.95	1	rs2095973	T	C	0.16	0.07	0.13	0.03							4 altered motifs		EXOSC10	intronic
chr1:11157313	chr1:11097256	0.95	1	rs12131652	T	C	0.13	0.07	0.13	0.03							Crx,Ets,Pitx2		EXOSC10	intronic
chr1:11157707	chr1:11097650	0.95	1	rs12131787	T	C	0.15	0.07	0.13	0.03							4 altered motifs		EXOSC10	intronic
chr1:11159571	chr1:11099514	0.95	1	rs12136339	G	A	0.23	0.11	0.16	0.03		24 organs	BLD	35 organs	9 bound proteins		Pax-5		EXOSC10	intronic
chr1:11159823	chr1:11099766	0.95	1	rs12133922	T	C	0.13	0.07	0.13	0.03		24 organs	BLD	37 organs	17 bound proteins				RP4-635E18.6	synonymous
chr1:11159968	chr1:11099911	0.95	1	rs17552394	G	A	0.13	0.07	0.13	0.03		24 organs	BLD	53 organs	18 bound proteins		LBP-9,Nrf1		RP4-635E18.6	intronic
chr1:11159989	chr1:11099932	0.95	1	rs17552387	T	C	0.23	0.11	0.16	0.03		24 organs	BLD	52 organs	18 bound proteins		AP-1,HEY1,YY1		RP4-635E18.6	intronic
chr1:11160367	chr1:11100310	0.95	1	rs2335276	T	A	0.23	0.11	0.17	0.03		23 organs	7 organs	4 organs	FOXA1		16 altered motifs		RP4-635E18.6	intronic
chr1:11160999	chr1:11100942	0.95	1	rs112467639	C	A	0.13	0.07	0.13	0.03							7 altered motifs		RP4-635E18.6	intronic
chr1:11162727	chr1:11102670	1	1	rs12117492	C	T	0.13	0.07	0.13	0.03							6 altered motifs		569bp 3' of RP4-635E18.6
chr1:11163060	chr1:11103003	1	1	rs77411241	C	T	0.24	0.12	0.17	0.03							4 altered motifs		902bp 3' of RP4-635E18.6
chr1:11163178	chr1:11103121	1	1	rs72871423	C	T	0.13	0.07	0.13	0.03									1kb 3' of RP4-635E18.6
chr1:11163310	chr1:11103253	1	1	rs72871426	C	A	0.22	0.11	0.17	0.03							15 altered motifs		1.2kb 3' of RP4-635E18.6
chr1:11163797	chr1:11103740	1	1	rs17036331	C	G	0.1	0.06	0.13	0.03							Hand1		1.6kb 3' of RP4-635E18.6
chr1:11164672	chr1:11104615	0.95	1	rs12143751	C	T	0	0.02	0.05	0.02							Hbp1		1.9kb 3' of MTOR
chr1:11165085	chr1:11105028	1	1	rs12134432	T	C	0.14	0.07	0.13	0.03							LXR,SRF		1.5kb 3' of MTOR
chr1:11165282	chr1:11105225	1	1	rs12133688	A	G	0.13	0.07	0.08	0.03							Pax-4,ZBTB7A		1.3kb 3' of MTOR
chr1:11165336	chr1:11105279	1	1	rs17229291	T	C	0.1	0.07	0.08	0.03							AIRE,Smad		1.3kb 3' of MTOR
chr1:11165396	chr1:11105339	1	1	rs17229284	A	G	0.1	0.06	0.08	0.03							BATF,Homez		1.2kb 3' of MTOR
chr1:11165440	chr1:11105383	1	1	rs17229277	T	C	0.13	0.07	0.08	0.03							NR4A		1.2kb 3' of MTOR
chr1:11165453	chr1:11105396	1	1	rs17235689	C	T	0.22	0.11	0.11	0.03							Egr-1,SP1,Zbtb3		1.1kb 3' of MTOR
chr1:11165513	chr1:11105456	1	1	rs17235682	C	T	0.1	0.06	0.08	0.03							4 altered motifs		1.1kb 3' of MTOR
chr1:11166009	chr1:11105952	1	1	rs12137958	G	A	0.13	0.07	0.08	0.03							GATA,Pax-5,STAT		582bp 3' of MTOR
chr1:11166713	chr1:11106656	1	1	rs2536	T	C	0.13	0.07	0.08	0.03							HMG-IY,Ik-3		MTOR	3'-UTR
chr1:11167146	chr1:11107089	1	1	rs12139042	G	A	0.1	0.06	0.08	0.03			BRN, ADRL						MTOR	3'-UTR
chr1:11167760	chr1:11107703	1	1	rs12117235	C	T	0.1	0.06	0.08	0.03			SKIN, ADRL	ADRL,KID,LNG			10 altered motifs		MTOR	intronic
chr1:11167829	chr1:11107772	1	1	rs12117241	C	T	0.13	0.07	0.08	0.03			SKIN, ADRL	ADRL,KID,LNG			Nkx2,PPAR,Roaz		MTOR	intronic
chr1:11167910	chr1:11107853	1	1	rs12117270	C	T	0.13	0.07	0.08	0.03			SKIN, ADRL	ADRL,LNG			4 altered motifs		MTOR	intronic
chr1:11168529	chr1:11108472	1	1	rs112932533	A	G	0.23	0.12	0.11	0.03			SKIN, ADRL				Ik-1,Rad21,SETDB1		MTOR	intronic
chr1:11169676	chr1:11109619	1	1	rs2275525	C	T	0.23	0.12	0.11	0.03			SKIN, BRN	SKIN,BRN,LNG					MTOR	intronic
chr1:11171226	chr1:11111169	1	1	rs17036350	C	T	0.23	0.12	0.11	0.03							Pbx-1,Zfp410		MTOR	intronic
chr1:11171622	chr1:11111565	1	1	rs17036353	C	T	0.1	0.07	0.08	0.03									MTOR	intronic
chr1:11174331	chr1:11114274	1	1	rs17235654	T	C	0.14	0.07	0.08	0.03							E2A,TBX5,ZEB1		MTOR	intronic
chr1:11175270	chr1:11115213	1	1	rs2275522	G	T	0.13	0.07	0.08	0.03			PANC				Egr-1		MTOR	intronic
chr1:11176208	chr1:11116151	1	1	rs12145459	C	A	0.13	0.07	0.08	0.03							Hlx1,Hmbox1,Lhx3		MTOR	intronic
chr1:11178777	chr1:11118720	1	1	rs12137491	T	C	0.13	0.07	0.08	0.03			BRST	SKIN					MTOR	intronic
chr1:11178884	chr1:11118827	1	1	rs12118083	C	G	0.13	0.07	0.08	0.03			BRST, SKIN	SKIN			YY1		MTOR	intronic
chr1:11179170	chr1:11119113	1	1	rs12140947	G	A	0.13	0.07	0.07	0.03			SKIN				CTCF,Pou2f2,RXRA		MTOR	intronic
chr1:11179405	chr1:11119348	1	1	rs180933986	T	C	0.13	0.07	0.08	0.03							4 altered motifs		MTOR	intronic
chr1:11179584	chr1:11119527	0.89	0.95	rs12119026	C	T	0.12	0.07	0.08	0.03							E2F,Zbtb3		MTOR	intronic
chr1:11179613	chr1:11119556	0.95	1	rs12119030	C	G	0.22	0.12	0.11	0.03							Gfi1		MTOR	intronic
chr1:11179962	chr1:11119905	0.95	1	rs12119863	C	A	0.13	0.07	0.08	0.02									MTOR	intronic
chr1:11180008	chr1:11119951	1	1	rs77301647	C	T	0.23	0.12	0.11	0.03							7 altered motifs		MTOR	intronic
chr1:11180282	chr1:11120225	1	1	rs113281911	G	A	0.13	0.07	0.08	0.03							NRSF,Pax-4,Znf143		MTOR	intronic
chr1:11180510	chr1:11120453	1	1	rs146413101	G	A	0.1	0.06	0.08	0.03							HNF4,Nkx2		MTOR	intronic
chr1:11180598	chr1:11120541	0.95	1	rs117327356	G	A	0	0.02	0.05	0.02							8 altered motifs		MTOR	intronic
chr1:11181457	chr1:11121400	1	1	rs17235633	G	T	0.13	0.07	0.08	0.03							SREBP		MTOR	intronic
chr1:11181630	chr1:11121573	1	1	rs12143194	G	A	0.13	0.07	0.08	0.03							AP-1,CIZ,Ik-2		MTOR	intronic
chr1:11182261	chr1:11122204	1	1	rs113055615	G	A	0.22	0.12	0.11	0.03							7 altered motifs		MTOR	intronic
chr1:11182633	chr1:11122576	1	1	rs147323179	T	C	0.13	0.07	0.08	0.03							TCF12		MTOR	intronic
chr1:11184489	chr1:11124432	1	1	rs868080	C	T	0.22	0.12	0.11	0.03							Evi-1,Rad21		MTOR	intronic
chr1:11185057	chr1:11125000	1	1	rs139027600	7-mer	T	0.13	0.07	0.08	0.03							NF-I,TLX1::NFIC,ZBTB33		MTOR	intronic
chr1:11185954	chr1:11125897	1	1	rs12354299	T	C	0.11	0.07	0.07	0.03							Pou2f2,TCF12,ZEB1		MTOR	intronic
chr1:11185958	chr1:11125901	1	1	rs12354300	T	C	0.23	0.12	0.11	0.03									MTOR	intronic
chr1:11186897	chr1:11126840	1	1	rs3737611	A	G	0.25	0.12	0.11	0.03			SKIN	MUS,MUS,SKIN	USF1		5 altered motifs		MTOR	intronic
chr1:11189191	chr1:11129134	0.89	0.95	rs3730379	G	A	0.13	0.07	0.08	0.03									MTOR	intronic
chr1:11192956	chr1:11132899	0.8	0.89	rs2275526	A	G	0.1	0.06	0.08	0.03			5 organs	MUS,MUS			22 altered motifs		MTOR	intronic
chr1:11193401	chr1:11133344	0.8	0.89	rs12141233	A	C	0.13	0.07	0.08	0.03			6 organs						MTOR	intronic
chr1:11193406	chr1:11133349	0.8	0.89	rs17235612	C	T	0.13	0.07	0.08	0.03			6 organs				AhR		MTOR	intronic
chr1:11193408	chr1:11133351	0.8	0.89	rs12122483	C	T	0.13	0.07	0.08	0.03			6 organs				AhR		MTOR	intronic
chr1:11194591	chr1:11134534	0.8	0.89	rs3730381	G	A	0.13	0.07	0.08	0.03		BRST, CRVX	16 organs	18 organs	10 bound proteins		Osr,Pbx3		MTOR	intronic
Query SNP: rs4074961 and variants with r2 >= 0.8
pos (hg19)	pos (hg38)	LD	LD	variant	Ref	Alt	AFR	AMR	ASN	EUR	SiPhy	Promoter	Enhancer	DNAse	Proteins	eQTL	Motifs	Drivers	GENCODE	dbSNP
		(r²)	(D')				freq	freq	freq	freq	cons	histone marks	histone marks		bound	tissues	changed	disrupted	genes	func annot
chr1:38091597	chr1:37625925	0.96	0.99	rs10796912	G	A	0.23	0.51	0.49	0.46							ELF1,Myc,SETDB1		RSPO1	intronic
chr1:38092723	chr1:37627051	1	1	rs4074961	C	T	0.23	0.51	0.49	0.46			ESDR				AP-1		RSPO1	intronic
Query SNP: rs945170 and variants with r2 >= 0.8
pos (hg19)	pos (hg38)	LD	LD	variant	Ref	Alt	AFR	AMR	ASN	EUR	SiPhy	Promoter	Enhancer	DNAse	Proteins	eQTL	Motifs	Drivers	GENCODE	dbSNP
		(r²)	(D')				freq	freq	freq	freq	cons	histone marks	histone marks		bound	tissues	changed	disrupted	genes	func annot
chr1:62866854	chr1:62401183	0.97	0.99	rs4439380	A	G	0.82	0.83	0.6	0.73		BRN	6 organs	7 organs			6 altered motifs	LHX8_2,Enh_c205;PDX1_5,Enh_c205	35kb 5' of USP1
chr1:62867483	chr1:62401812	1	1	rs945170	T	G	0.81	0.82	0.6	0.72			5 organs				Fox		34kb 5' of USP1
Query SNP: rs1548942 and variants with r2 >= 0.8
pos (hg19)	pos (hg38)	LD	LD	variant	Ref	Alt	AFR	AMR	ASN	EUR	SiPhy	Promoter	Enhancer	DNAse	Proteins	eQTL	Motifs	Drivers	GENCODE	dbSNP
		(r²)	(D')				freq	freq	freq	freq	cons	histone marks	histone marks		bound	tissues	changed	disrupted	genes	func annot
chr2:217613285	chr2:216748562	0.98	-1	rs8179795	C	T	0.64	0.81	0.85	0.84							Hsf,NF-kappaB		AC007563.5
chr2:217613623	chr2:216748900	0.98	-1	rs6750186	C	T	0.65	0.81	0.85	0.84							ZEB1		AC007563.5
chr2:217614083	chr2:216749360	0.98	-1	rs6711608	T	C	0.84	0.83	0.85	0.84							13 altered motifs		AC007563.5
chr2:217614595	chr2:216749872	0.98	1	rs145058908	T	C	0.01	0.16	0.15	0.16							Nkx6-1,Sox,Zfp128		AC007563.5
chr2:217614730	chr2:216750007	0.98	-1	rs6435952	A	T	0.7	0.81	0.85	0.84									AC007563.5
chr2:217616274	chr2:216751551	0.99	1	rs147505716	A	G	0.01	0.15	0.15	0.16							10 altered motifs		AC007563.5
chr2:217616804	chr2:216752081	0.98	-1	rs1861630	T	C	0.87	0.83	0.85	0.84									AC007563.5
chr2:217618897	chr2:216754174	0.99	1	rs1548943	C	G	0.01	0.16	0.15	0.16			4 organs				4 altered motifs		AC007563.5
chr2:217619036	chr2:216754313	1	1	rs1548942	C	T	0.01	0.15	0.14	0.16			4 organs				SRF,STAT		AC007563.5
chr2:217619060	chr2:216754337	1	1	rs1548941	C	A	0.01	0.15	0.14	0.16			4 organs				HNF4,Pax-5		AC007563.5
chr2:217619253	chr2:216754530	1	1	rs2541413	C	T	0.01	0.15	0.15	0.16			6 organs	BRN					AC007563.5
chr2:217619858	chr2:216755135	0.99	1	rs2712170	G	T	0.01	0.15	0.14	0.16			5 organs	ESDR,ADRL			EWSR1-FLI1,GR		AC007563.5
chr2:217624194	chr2:216759471	0.97	-0.99	rs2888429	T	C	0.88	0.82	0.85	0.84			GI				Pax-4		AC007563.5
chr2:217624249	chr2:216759526	0.98	0.99	rs2098418	C	G	0.02	0.16	0.14	0.16			GI				NRSF		AC007563.5
chr2:217627150	chr2:216762427	0.95	-0.99	rs10932677	G	A	0.83	0.83	0.86	0.83							Foxa,Hsf		AC007563.5
chr2:217628087	chr2:216763364	0.95	-0.99	rs6435953	C	T	0.68	0.81	0.79	0.83			ESC, IPSC				Sox,TEF		AC007563.5
chr2:217631338	chr2:216766615	0.89	0.98	rs17773965	C	T	0.16	0.17	0.13	0.15		ESC, IPSC	12 organs	GI			DMRT5,Foxp1		AC007563.5
chr2:217631840	chr2:216767117	0.89	0.98	rs2193234	C	T	0.05	0.16	0.12	0.15			12 organs	THYM			BDP1		AC007563.5
chr2:217632085	chr2:216767362	0.83	-0.95	rs7602943	A	G	0.79	0.82	0.81	0.85			6 organs				Tgif1		AC007563.5
Query SNP: rs2245601 and variants with r2 >= 0.8
pos (hg19)	pos (hg38)	LD	LD	variant	Ref	Alt	AFR	AMR	ASN	EUR	SiPhy	Promoter	Enhancer	DNAse	Proteins	eQTL	Motifs	Drivers	GENCODE	dbSNP
		(r²)	(D')				freq	freq	freq	freq	cons	histone marks	histone marks		bound	tissues	changed	disrupted	genes	func annot
chr2:233389326	chr2:232524616	0.98	0.99	rs2853446	C	T	0.33	0.49	0.66	0.46		5 organs	19 organs	5 organs	ZNF263		MZF1::1-4		1.4kb 5' of CHRND	intronic
chr2:233390937	chr2:232526227	1	1	rs2245601	A	G	0.32	0.5	0.66	0.46		MUS	11 organs	5 organs			Ets,NRSF,Sin3Ak-20		CHRND	synonymous
Query SNP: rs485554 and variants with r2 >= 0.8
pos (hg19)	pos (hg38)	LD	LD	variant	Ref	Alt	AFR	AMR	ASN	EUR	SiPhy	Promoter	Enhancer	DNAse	Proteins	eQTL	Motifs	Drivers	GENCODE	dbSNP
		(r²)	(D')				freq	freq	freq	freq	cons	histone marks	histone marks		bound	tissues	changed	disrupted	genes	func annot
chr3:172127332	chr3:172409542	0.89	0.95	rs148564075	T	TTAAA	0.04	0.27	0.46	0.29							20 altered motifs		7.9kb 3' of FNDC3B
chr3:172137343	chr3:172419553	1	1	rs485554	G	C	0.05	0.28	0.43	0.29							5 altered motifs		18kb 3' of FNDC3B
chr3:172153628	chr3:172435838	0.97	0.99	rs564634	G	C	0.08	0.28	0.43	0.29									9.3kb 3' of GHSR
chr3:172155585	chr3:172437795	0.93	0.99	rs555554	G	T	0.2	0.36	0.43	0.3							6 altered motifs		7.3kb 3' of GHSR
chr3:172162382	chr3:172444592	0.93	0.98	rs146582211	9-mer	T	0.05	0.27	0.44	0.28							Foxp3,Hand1		540bp 3' of GHSR	3'-UTR
chr3:172162394	chr3:172444604	0.93	0.98	rs200934590	T	TCC	0.05	0.27	0.44	0.28							Foxp3,Hand1,Nr2f2		528bp 3' of GHSR	3'-UTR
chr3:172163449	chr3:172445659	0.97	0.99	rs509035	G	A	0.05	0.28	0.44	0.29							Crx,Hoxb13,NF-kappaB		GHSR	intronic
chr3:172165727	chr3:172447937	0.97	0.99	rs572169	C	T	0.05	0.28	0.44	0.29		ESC, IPSC, BRN	15 organs				8 altered motifs		GHSR	synonymous
Query SNP: rs10663094 and variants with r2 >= 0.8
pos (hg19)	pos (hg38)	LD	LD	variant	Ref	Alt	AFR	AMR	ASN	EUR	SiPhy	Promoter	Enhancer	DNAse	Proteins	eQTL	Motifs	Drivers	GENCODE	dbSNP
		(r²)	(D')				freq	freq	freq	freq	cons	histone marks	histone marks		bound	tissues	changed	disrupted	genes	func annot
chr3:181363464	chr3:181645676	1	1	rs10663094	A	ACT,AT													SOX2-OT	intronic
Query SNP: rs16896276 and variants with r2 >= 0.8
pos (hg19)	pos (hg38)	LD	LD	variant	Ref	Alt	AFR	AMR	ASN	EUR	SiPhy	Promoter	Enhancer	DNAse	Proteins	eQTL	Motifs	Drivers	GENCODE	dbSNP
		(r²)	(D')				freq	freq	freq	freq	cons	histone marks	histone marks		bound	tissues	changed	disrupted	genes	func annot
chr4:17875735	chr4:17874112	0.82	0.93	rs78581007	TCTC	T	0.25	0.33	0.48	0.28			PANC				4 altered motifs		LCORL	intronic
chr4:17901679	chr4:17900056	0.93	-0.97	rs979532	C	T	0.78	0.68	0.51	0.7							HMG-IY,NF-Y,Sox		LCORL	intronic
chr4:17903654	chr4:17902031	0.93	-0.97	rs4144829	C	T	0.76	0.68	0.51	0.7							6 altered motifs		LCORL	intronic
chr4:17917781	chr4:17916158	0.91	-0.97	rs2174633	A	C	0.66	0.65	0.51	0.7							11 altered motifs		LCORL	intronic
chr4:17917818	chr4:17916195	0.91	-0.97	rs2135509	G	A	0.66	0.65	0.51	0.7							4 altered motifs		LCORL	intronic
chr4:17919066	chr4:17917443	0.85	-0.96	rs12645584	C	T	0.49	0.63	0.41	0.69							4 altered motifs		LCORL	intronic
chr4:17919811	chr4:17918188	0.91	-0.97	rs925098	G	A	0.66	0.65	0.51	0.7							4 altered motifs		LCORL	intronic
chr4:17925798	chr4:17924175	0.92	-0.97	rs13108684	T	C	0.6	0.65	0.41	0.7							CEBPA,CEBPB,TEF		LCORL	intronic
chr4:17933670	chr4:17932047	0.94	-0.98	rs2658750	G	C	0.57	0.65	0.38	0.7			SKIN, BRST				5 altered motifs		LCORL	intronic
chr4:17942560	chr4:17940937	0.97	-0.99	rs2707450	C	T	0.79	0.68	0.51	0.71							8 altered motifs		LCORL	intronic
chr4:17946432	chr4:17944809	0.96	-0.99	rs2724475	T	C	0.68	0.66	0.51	0.7			GI				BRCA1,Zec		LCORL	intronic
chr4:17956213	chr4:17954590	0.98	-0.99	rs34067272	TG	T	0.78	0.68	0.51	0.71			STRM				6 altered motifs		LCORL	intronic
chr4:17969698	chr4:17968075	0.96	-0.99	rs2724485	T	C	0.63	0.66	0.41	0.7							ZEB1		LCORL	intronic
chr4:17970263	chr4:17968640	0.96	-0.99	rs2724486	C	T	0.68	0.66	0.51	0.7			BRST, SKIN				4 altered motifs		LCORL	intronic
chr4:17972372	chr4:17970749	0.96	-0.99	rs2320299	G	A	0.62	0.65	0.41	0.7			5 organs	BLD					LCORL	intronic
chr4:17978892	chr4:17977269	0.95	-0.97	rs2724472	A	T	0.68	0.66	0.51	0.71			SKIN				En-1,Foxp1		LCORL	intronic
chr4:17993410	chr4:17991787	0.96	-0.99	rs724577	A	C	0.68	0.66	0.51	0.7							4 altered motifs		LCORL	intronic
chr4:17998426	chr4:17996803	0.98	0.99	rs2061456	C	A	0.03	0.31	0.49	0.29		SKIN	4 organs						LCORL	intronic
chr4:18007761	chr4:18006138	0.8	0.99	rs112743014	A	C	0.02	0.27	0.49	0.25							Pou3f1		LCORL	intronic
chr4:18008232	chr4:18006609	0.97	-0.99	rs2610990	A	G	0.79	0.67	0.51	0.71					NFKB		9 altered motifs		LCORL	intronic
chr4:18015156	chr4:18013533	1	1	rs16896276	T	A	0.03	0.31	0.49	0.29			SKIN, PANC, BLD						LCORL	intronic
chr4:18025484	chr4:18023861	0.97	-0.99	rs2011603	G	A	0.68	0.65	0.51	0.7			ESDR				SMC3		2kb 5' of LCORL
Query SNP: rs1800813 and variants with r2 >= 0.8
pos (hg19)	pos (hg38)	LD	LD	variant	Ref	Alt	AFR	AMR	ASN	EUR	SiPhy	Promoter	Enhancer	DNAse	Proteins	eQTL	Motifs	Drivers	GENCODE	dbSNP
		(r²)	(D')				freq	freq	freq	freq	cons	histone marks	histone marks		bound	tissues	changed	disrupted	genes	func annot
chr4:55076237	chr4:54210070	0.86	0.97	rs6832597	C	A	0.24	0.32	0.27	0.23							GR,HDAC2,p300		FIP1L1
chr4:55076345	chr4:54210178	0.86	0.97	rs6831380	G	A	0.22	0.32	0.27	0.23									FIP1L1
chr4:55077078	chr4:54210911	0.86	0.97	rs7676972	C	T	0.14	0.32	0.27	0.23							Myc,Myf		FIP1L1
chr4:55077549	chr4:54211382	0.81	0.97	rs6554160	T	A	0.23	0.34	0.27	0.24							8 altered motifs		FIP1L1
chr4:55078614	chr4:54212447	0.89	0.98	rs139145626	C	T	0.16	0.32	0.25	0.2							ERalpha-a,Nrf-2,TCF11::MafG		FIP1L1
chr4:55082158	chr4:54215991	0.98	1	rs11133315	G	A	0.23	0.32	0.26	0.21			5 organs	SKIN			Foxp1		FIP1L1
chr4:55085620	chr4:54219453	0.98	1	rs7682912	T	G	0.22	0.32	0.26	0.21			LNG				BDP1,GATA,HDAC2		FIP1L1
chr4:55086816	chr4:54220649	0.97	0.99	rs60806423	C	T	0.24	0.32	0.23	0.21							Brachyury,E2A,LBP-1		FIP1L1
chr4:55087144	chr4:54220977	0.98	1	rs113828936	G	A	0.33	0.32	0.23	0.21							BDP1,Maf,NF-E2		FIP1L1
chr4:55087581	chr4:54221414	0.98	1	rs17084051	C	A	0.31	0.32	0.23	0.21									FIP1L1
chr4:55088175	chr4:54222008	0.98	1	rs61320297	G	A	0.34	0.32	0.23	0.21							STAT		FIP1L1
chr4:55088543	chr4:54222376	0.98	1	rs7673597	C	T	0.32	0.32	0.23	0.21							6 altered motifs		FIP1L1
chr4:55088586	chr4:54222419	0.98	1	rs7673625	C	T	0.34	0.32	0.23	0.21							Irf		FIP1L1
chr4:55088761	chr4:54222594	0.98	1	rs7673984	C	T	0.14	0.31	0.23	0.21							PLZF		FIP1L1
chr4:55088909	chr4:54222742	0.93	1	rs4394060	C	A	0.22	0.3	0.23	0.2							4 altered motifs		FIP1L1
chr4:55089814	chr4:54223647	0.98	1	rs4864857	T	C	0.23	0.32	0.23	0.21							CTCF,Rad21,ZBTB33		FIP1L1
chr4:55089953	chr4:54223786	0.96	1	rs4864858	T	A	0.31	0.31	0.23	0.21							42 altered motifs		FIP1L1
chr4:55090015	chr4:54223848	0.94	0.98	rs4864859	A	G	0.36	0.32	0.23	0.21							5 altered motifs		FIP1L1
chr4:55090021	chr4:54223854	0.96	1	rs4864860	T	C	0.37	0.31	0.23	0.21							E2F,SREBP,YY1		FIP1L1
chr4:55090099	chr4:54223932	0.92	0.96	rs60863210	T	C	0.33	0.32	0.23	0.22									FIP1L1
chr4:55090656	chr4:54224489	0.98	1	rs7698425	C	T	0.32	0.32	0.23	0.21			4 organs				11 altered motifs		FIP1L1
chr4:55090886	chr4:54224719	0.98	1	rs7681399	T	G	0.32	0.32	0.23	0.21			6 organs				HNF4,LF-A1,Nr2f2		FIP1L1
chr4:55093789	chr:	0.98	1	rs144906182	CAACTT	C	0.33	0.32	0.23	0.21		19 organs	18 organs	26 organs	P300,YY1		MIF-1		FIP1L1
chr4:55093914	chr4:54227747	0.98	1	rs1800809	A	G	0.32	0.32	0.23	0.21		20 organs	18 organs	30 organs	P300,RAD21,YY1		HNF4,NRSF,Sin3Ak-20		FIP1L1
chr4:55094031	chr4:54227864	0.98	1	rs1800810	C	G	0.37	0.32	0.24	0.21		20 organs	17 organs	26 organs	POL2,P300,YY1		Esr2,RXRA		FIP1L1
chr4:55094467	chr4:54228300	1	1	rs1800813	G	A	0.15	0.31	0.23	0.21		16 organs	19 organs	30 organs	9 bound proteins		CCNT2,Spz1		FIP1L1
chr4:55094629	chr4:54228462	0.98	1	rs1800812	G	T	0.32	0.32	0.23	0.21		19 organs	15 organs	18 organs	CTBP2,SUZ12		4 altered motifs		FIP1L1
chr4:55096150	chr4:54229983	0.98	1	rs7690503	C	G	0.36	0.32	0.23	0.21		19 organs	8 organs	SKIN			16 altered motifs		PDGFRA	intronic
chr4:55096180	chr4:54230013	0.95	0.98	rs7673027	T	A	0.35	0.32	0.23	0.22		19 organs	8 organs	5 organs			8 altered motifs		PDGFRA	intronic
chr4:55096398	chr4:54230231	0.98	1	rs7689569	G	A	0.23	0.32	0.23	0.21		19 organs	16 organs	4 organs			6 altered motifs		PDGFRA	intronic
chr4:55096606	chr4:54230439	0.95	1	rs7673853	T	C	0.36	0.32	0.24	0.2		19 organs	16 organs	7 organs			16 altered motifs		PDGFRA	intronic
chr4:55097373	chr4:54231206	0.98	0.99	rs7679903	T	C	0.31	0.32	0.23	0.21		18 organs	18 organs	17 organs			SIX5,Znf143		PDGFRA	intronic
chr4:55097405	chr4:54231238	0.98	1	rs890203	A	C	0.32	0.32	0.23	0.21		19 organs	18 organs	17 organs			4 altered motifs		PDGFRA	intronic
chr4:55097685	chr4:54231518	0.98	1	rs4864861	C	T	0.23	0.32	0.23	0.21		18 organs	18 organs	7 organs	SUZ12		HEY1,NF-E2,UF1H3BETA		PDGFRA	intronic
chr4:55098936	chr4:54232769	0.98	1	rs4608869	G	C	0.32	0.31	0.23	0.21		22 organs	14 organs				Mef2,Zfp187		PDGFRA	intronic
chr4:55098954	chr4:54232787	0.96	0.98	rs4368668	A	G	0.29	0.32	0.23	0.22		22 organs	14 organs		CTCF		GR		PDGFRA	intronic
chr4:55099041	chr4:54232874	0.98	1	rs4635872	C	A	0.32	0.32	0.23	0.21		22 organs	11 organs	27 organs	CTCF		10 altered motifs		PDGFRA	intronic
chr4:55099164	chr4:54232997	0.98	1	rs6850748	T	G	0.32	0.31	0.23	0.21		22 organs	11 organs	45 organs	CTCF		LBP-1,LXR,Sin3Ak-20		PDGFRA	intronic
chr4:55099865	chr4:54233698	0.96	0.98	rs148508652	G	GGAC	0.3	0.32	0.23	0.22		23 organs	8 organs	26 organs			COMP1,Pax-3		PDGFRA	intronic
chr4:55100425	chr4:54234258	0.96	0.99	rs60487071	AT	A	0.32	0.32	0.23	0.21		22 organs	10 organs	28 organs	STAT3,CTCF		4 altered motifs		PDGFRA	intronic
chr4:55100489	chr4:54234322	0.98	1	rs4864862	G	A	0.32	0.32	0.23	0.21		22 organs	10 organs	46 organs	7 bound proteins				PDGFRA	intronic
chr4:55100831	chr4:54234664	0.98	1	rs4864863	A	G	0.33	0.32	0.23	0.21		17 organs	17 organs	17 organs			Nanog,Pou2f2	POU2F2_1,Pro_c37;POU3F4_2,Pro_c37	PDGFRA	intronic
chr4:55102425	chr4:54236258	0.98	1	rs7678144	T	C	0.35	0.32	0.23	0.21		4 organs	5 organs				7 altered motifs		PDGFRA	intronic
chr4:55102559	chr4:54236392	0.98	1	rs6554163	T	A	0.34	0.32	0.23	0.21		4 organs	5 organs	ESDR			BAF155,SIX5,Znf143		PDGFRA	intronic
chr4:55102741	chr4:54236574	0.98	1	rs6836215	T	C	0.34	0.32	0.23	0.21		FAT	5 organs	6 organs			Egr-1,HIF1		PDGFRA	intronic
chr4:55104454	chr4:54238287	0.98	1	rs67432867	A	T	0.34	0.32	0.23	0.21			7 organs				Duxl,Foxj1,Sox		PDGFRA	intronic
chr4:55104604	chr4:54238437	0.98	1	rs73252942	T	C	0.34	0.32	0.23	0.21			8 organs	ESDR,SKIN,PLCNT			Evi-1,PLZF		PDGFRA	intronic
Query SNP: rs7657200 and variants with r2 >= 0.8
pos (hg19)	pos (hg38)	LD	LD	variant	Ref	Alt	AFR	AMR	ASN	EUR	SiPhy	Promoter	Enhancer	DNAse	Proteins	eQTL	Motifs	Drivers	GENCODE	dbSNP
		(r²)	(D')				freq	freq	freq	freq	cons	histone marks	histone marks		bound	tissues	changed	disrupted	genes	func annot
chr4:73441309	chr4:72575592	0.84	0.94	rs13106211	A	C	0.13	0.24	0.26	0.35							6 altered motifs		6.8kb 5' of ADAMTS3
chr4:73451493	chr4:72585776	0.88	0.94	rs13146398	T	G	0.14	0.25	0.27	0.36							4 altered motifs		17kb 5' of ADAMTS3
chr4:73454114	chr4:72588397	0.88	0.94	rs719382	C	T	0.13	0.24	0.27	0.36			FAT, BLD, ADRL				6 altered motifs		20kb 5' of ADAMTS3
chr4:73473151	chr4:72607434	1	1	rs7657200	G	A	0.15	0.24	0.27	0.36									39kb 5' of ADAMTS3
chr4:73491461	chr4:72625744	0.87	0.98	rs13146696	G	A	0.14	0.23	0.27	0.34							Mrg1::Hoxa9,Mrg,VDR		57kb 5' of ADAMTS3
chr4:73497132	chr4:72631415	0.87	0.98	rs7695010	T	C	0.14	0.23	0.27	0.34			8 organs	13 organs	STAT3,P300		Pou6f1,Zfp691		63kb 5' of ADAMTS3
chr4:73500498	chr4:72634781	0.84	0.98	rs143163098	T	A	0.14	0.23	0.27	0.33							4 altered motifs		66kb 5' of ADAMTS3
chr4:73501280	chr4:72635563	0.81	0.97	rs13142832	G	T	0.12	0.23	0.27	0.32							Evi-1,HMG-IY,Maf		67kb 5' of ADAMTS3
Query SNP: rs6831679 and variants with r2 >= 0.8
pos (hg19)	pos (hg38)	LD	LD	variant	Ref	Alt	AFR	AMR	ASN	EUR	SiPhy	Promoter	Enhancer	DNAse	Proteins	eQTL	Motifs	Drivers	GENCODE	dbSNP
		(r²)	(D')				freq	freq	freq	freq	cons	histone marks	histone marks		bound	tissues	changed	disrupted	genes	func annot
chr4:128015177	chr4:127094022	0.82	0.92	rs11938381	T	C	0.24	0.33	0.36	0.26									2.9kb 3' of RP11-125O18.1
chr4:128039143	chr4:127117988	0.81	0.91	rs1383520	C	T	0.05	0.24	0.1	0.25							Pou3f4		RP11-125O18.1
chr4:128054382	chr4:127133227	0.82	0.92	rs139989302	CT	C	0.05	0.24	0.1	0.25							11 altered motifs		RP11-125O18.1
chr4:128056771	chr4:127135616	0.81	0.92	rs55824976	C	A	0.05	0.24	0.1	0.25							Pbx3		RP11-125O18.1
chr4:128062984	chr4:127141829	0.81	0.91	rs1480910	A	G	0.05	0.24	0.1	0.25			8 organs	ESDR,SKIN			FAC1		RP11-125O18.1
chr4:128063135	chr4:127141980	0.82	0.92	rs1480909	A	G	0.05	0.24	0.1	0.25			8 organs	9 organs			19 altered motifs		RP11-125O18.1
chr4:128063987	chr4:127142832	0.82	0.92	rs62335523	A	G	0.05	0.24	0.09	0.25		FAT	6 organs				4 altered motifs		RP11-125O18.1
chr4:128072997	chr4:127151842	0.84	0.94	rs4550946	G	C	0.05	0.23	0.1	0.24							38 altered motifs		RP11-125O18.1
chr4:128073770	chr4:127152615	0.84	0.94	rs62335525	C	T	0.05	0.23	0.1	0.24							Arid3a,Pax-8,Pitx2		RP11-125O18.1
chr4:128074344	chr4:127153189	0.83	0.94	rs57788627	C	T	0.05	0.23	0.1	0.24							4 altered motifs		RP11-125O18.1
chr4:128074626	chr4:127153471	0.84	0.94	rs61385520	T	G	0.06	0.24	0.08	0.24							Irf		RP11-125O18.1
chr4:128076589	chr4:127155434	0.84	0.94	rs62335528	T	A	0.05	0.23	0.1	0.24			FAT, STRM	SKIN			HDAC2,Pou1f1,STAT		RP11-125O18.1
chr4:128077883	chr4:127156728	0.84	0.94	rs1351426	A	G	0.05	0.23	0.1	0.24			FAT, STRM				CTCF,Gfi1,Zbtb3		RP11-125O18.1
chr4:128078010	chr4:127156855	0.83	0.93	rs1351425	T	C	0.05	0.23	0.1	0.25			STRM				HMG-IY,Mef2		RP11-125O18.1
chr4:128081087	chr4:127159932	0.85	0.95	rs983004	G	A	0.05	0.23	0.1	0.24									RP11-125O18.1
chr4:128083114	chr4:127161959	0.86	0.96	rs62333871	C	T	0.05	0.23	0.1	0.24							10 altered motifs		RP11-125O18.1
chr4:128083656	chr4:127162501	0.86	0.96	rs17293310	T	C	0.05	0.23	0.1	0.24			4 organs				Foxp1,TAL1		RP11-125O18.1
chr4:128083751	chr4:127162596	0.86	0.96	rs17293345	T	G	0.05	0.23	0.1	0.24			4 organs				BDP1		RP11-125O18.1
chr4:128083879	chr4:127162724	0.85	0.95	rs17293359	G	A	0.05	0.23	0.1	0.24			4 organs	ESDR			Hoxc10		RP11-125O18.1
chr4:128086211	chr4:127165056	0.86	0.96	rs113800397	G	A	0.05	0.23	0.1	0.24							GCNF,LXR,Nr2f2		RP11-125O18.1
chr4:128087596	chr4:127166441	0.86	0.96	rs72680008	T	C	0.05	0.23	0.1	0.24			ESDR, BRST				5 altered motifs		RP11-125O18.1
chr4:128088143	chr4:127166988	0.86	0.96	rs62333872	T	C	0.05	0.23	0.1	0.24							BCL,GATA,HMGN3		RP11-125O18.1
chr4:128088781	chr4:127167626	0.86	0.96	rs718245	A	G	0.05	0.23	0.1	0.24							DMRT2		RP11-125O18.1
chr4:128089639	chr4:127168484	0.86	0.96	rs62333873	G	A	0.05	0.23	0.1	0.24				SKIN			Pou2f2		RP11-125O18.1
chr4:128090092	chr4:127168937	0.86	0.96	rs62333874	C	T	0.05	0.23	0.1	0.24							Maf,NF-kappaB,Pax-2		RP11-125O18.1
chr4:128091029	chr4:127169874	0.86	0.96	rs1021063	C	T	0.05	0.23	0.1	0.24							Pbx3,Pou5f1		RP11-125O18.1
chr4:128095552	chr4:127174397	0.88	0.96	rs7694318	T	C	0.05	0.23	0.1	0.24			GI	KID,MUS					RP11-125O18.1
chr4:128100357	chr4:127179202	0.88	0.96	rs981162	T	C	0.05	0.23	0.1	0.24				MUS			5 altered motifs		RP11-125O18.1
chr4:128103242	chr4:127182087	0.88	0.96	rs1480897	T	C	0.05	0.23	0.1	0.24							Nkx2		RP11-125O18.1
chr4:128103825	chr4:127182670	0.89	0.97	rs976814	A	T	0.05	0.23	0.1	0.24			LNG						RP11-125O18.1
chr4:128104940	chr4:127183785	0.89	0.97	rs62333879	T	G	0.05	0.23	0.1	0.24							Cdx,HNF4,PLZF		RP11-125O18.1
chr4:128108409	chr4:127187254	0.89	0.97	rs6822731	T	C	0.05	0.23	0.1	0.24							Foxp3,Pou1f1		RP11-125O18.1
chr4:128109290	chr4:127188135	0.82	0.98	rs72680016	C	A	0.05	0.23	0.1	0.23							Dobox4,Pax-4,Zec		RP11-125O18.1
chr4:128112007	chr4:127190852	0.89	0.96	rs62333881	T	C	0.09	0.23	0.1	0.25							BDP1,CDP,YY1		RP11-125O18.1
chr4:128112223	chr4:127191068	0.89	0.96	rs56003217	A	G	0.09	0.23	0.1	0.25							Pou2f2,TATA		RP11-125O18.1
chr4:128113424	chr4:127192269	1	1	rs6831679	G	A	0.32	0.3	0.37	0.25							Hbp1		RP11-125O18.1
chr4:128114533	chr4:127193378	1	1	rs10012878	C	G	0.44	0.31	0.37	0.25									RP11-125O18.1
chr4:128122361	chr4:127201206	0.94	0.99	rs139138174	C	A	0.3	0.32	0.39	0.26							9 altered motifs		RP11-125O18.1
chr4:128122419	chr4:127201264	0.93	0.99	rs143949331	C	G	0.08	0.23	0.1	0.25									RP11-125O18.1
chr4:128127668	chr4:127206513	0.92	0.98	rs55773382	G	A	0.08	0.23	0.1	0.25							Myc,ZEB1		RP11-125O18.1
chr4:128128472	chr4:127207317	0.93	0.99	rs62333900	C	G	0.08	0.23	0.1	0.24							FAC1,SP2		RP11-125O18.1
chr4:128128866	chr4:127207711	0.94	0.99	rs150180559	C	T	0.05	0.23	0.1	0.25							CEBPA,Maf		RP11-125O18.1
chr4:128129136	chr4:127207981	0.94	0.99	rs4550943	T	G	0.08	0.23	0.1	0.25							14 altered motifs		RP11-125O18.1
chr4:128129620	chr4:127208465	0.94	0.99	rs138657595	G	T	0.08	0.23	0.1	0.25							ATF3		RP11-125O18.1
chr4:128131766	chr4:127210611	0.94	0.99	rs17294432	C	T	0.08	0.23	0.1	0.25			8 organs				Osf2,PEBP,Smad		RP11-125O18.1
chr4:128132438	chr4:127211283	0.94	0.99	rs62333903	T	G	0.08	0.23	0.1	0.25			7 organs	KID,MUS			4 altered motifs		RP11-125O18.1
chr4:128133360	chr4:127212205	0.94	0.99	rs17228715	G	A	0.08	0.23	0.1	0.25			12 organs	7 organs			5 altered motifs		RP11-125O18.1
chr4:128133589	chr4:127212434	0.94	0.99	rs62333904	C	T	0.08	0.23	0.1	0.25		FAT	12 organs	6 organs			Pou5f1		RP11-125O18.1
chr4:128134297	chr4:127213142	0.94	0.99	rs17228756	A	G	0.08	0.23	0.1	0.25			FAT, STRM				6 altered motifs		RP11-125O18.1
chr4:128134453	chr4:127213298	0.94	0.99	rs72680022	C	T	0.09	0.23	0.1	0.25			FAT, STRM				6 altered motifs		RP11-125O18.1
chr4:128134893	chr4:127213738	0.94	0.99	rs62333905	T	C	0.08	0.23	0.1	0.25			FAT, STRM				DMRT2		RP11-125O18.1
chr4:128135027	chr4:127213872	0.94	0.99	rs17294586	C	G	0.08	0.23	0.1	0.25		FAT	6 organs	LNG,MUS			GR,Pdx1		RP11-125O18.1
chr4:128135444	chr4:127214289	0.95	1	rs17228875	G	A	0.09	0.23	0.1	0.25		FAT	10 organs	5 organs					RP11-125O18.1
chr4:128135790	chr4:127214635	0.95	1	rs17294663	A	C	0.08	0.23	0.1	0.25			6 organs	LNG,MUS			GCNF		RP11-125O18.1
chr4:128135833	chr4:127214678	0.95	1	rs62333906	T	A	0.08	0.23	0.1	0.25			FAT				Hic1		RP11-125O18.1
chr4:128135891	chr4:127214736	0.95	1	rs62333907	G	A	0.08	0.23	0.1	0.25			FAT				5 altered motifs		RP11-125O18.1
chr4:128137000	chr4:127215845	0.95	1	rs10012435	A	G	0.27	0.24	0.1	0.25							Zbtb3		RP11-125O18.1
chr4:128137205	chr4:127216050	0.95	1	rs62333908	C	G	0.09	0.23	0.1	0.25							DMRT4		RP11-125O18.1
chr4:128137401	chr4:127216246	0.95	1	rs11098914	T	C	0.08	0.23	0.1	0.25									RP11-125O18.1
chr4:128137575	chr4:127216420	0.95	1	rs11098915	A	G	0.08	0.23	0.1	0.25							4 altered motifs		RP11-125O18.1
chr4:128137593	chr4:127216438	0.95	1	rs10518518	G	C	0.08	0.23	0.1	0.25							VDR,p300		RP11-125O18.1
chr4:128137856	chr4:127216701	0.95	1	rs998857	T	G	0.08	0.23	0.1	0.25							7 altered motifs		RP11-125O18.1
chr4:128137915	chr4:127216760	0.95	1	rs998858	A	G	0.08	0.23	0.1	0.25							Pax-5,Pou2f2		RP11-125O18.1
chr4:128138244	chr4:127217089	0.95	1	rs1000707	C	A	0.08	0.23	0.1	0.25							AP-4,NRSF		RP11-125O18.1
chr4:128138550	chr4:127217395	0.95	1	rs17229246	C	T	0.27	0.25	0.1	0.25			STRM, FAT				HNF1,Nkx2		RP11-125O18.1
chr4:128139496	chr4:127218341	0.95	1	rs999285	T	C	0.08	0.23	0.1	0.25			STRM				Mrg,SP1		RP11-125O18.1
chr4:128139623	chr4:127218468	0.95	1	rs11098916	T	C	0.08	0.23	0.1	0.25			STRM				DMRT5,Pax-4		RP11-125O18.1
chr4:128139650	chr4:127218495	0.95	1	rs11098917	A	G	0.08	0.23	0.1	0.25			STRM				Pbx3,RREB-1		RP11-125O18.1
chr4:128139810	chr4:127218655	0.95	1	rs6853523	G	A	0.08	0.23	0.1	0.25			STRM				INSM1,SRF		RP11-125O18.1
chr4:128139879	chr4:127218724	0.95	0.99	rs6857872	A	G	0.08	0.23	0.1	0.25			STRM						RP11-125O18.1
chr4:128139968	chr4:127218813	0.95	1	rs6857937	A	C	0.08	0.23	0.1	0.25			STRM				NF-AT		RP11-125O18.1
chr4:128140094	chr4:127218939	0.95	1	rs6858838	G	T	0.27	0.24	0.1	0.25			STRM				6 altered motifs		RP11-125O18.1
chr4:128140385	chr4:127219230	0.92	0.96	rs6836252	T	G	0.08	0.24	0.1	0.25			STRM				PU.1		RP11-125O18.1
chr4:128140518	chr4:127219363	0.95	1	rs6836483	T	A	0.08	0.23	0.1	0.25			FAT, STRM	4 organs			GATA		RP11-125O18.1
chr4:128140526	chr4:127219371	0.95	1	rs6810678	A	G	0.08	0.23	0.1	0.25			FAT, STRM	5 organs			COMP1,EWSR1-FLI1		RP11-125O18.1
chr4:128140776	chr4:127219621	0.95	1	rs28524825	T	A	0.27	0.24	0.1	0.25			FAT, STRM				AIRE		RP11-125O18.1
chr4:128140825	chr4:127219670	0.95	1	rs56387802	C	G	0.08	0.23	0.1	0.25			STRM				6 altered motifs		RP11-125O18.1
chr4:128140916	chr4:127219761	0.95	1	rs56216620	A	G	0.08	0.23	0.1	0.25			STRM				5 altered motifs		RP11-125O18.1
chr4:128142587	chr4:127221432	0.92	0.99	rs62333954	G	A	0.1	0.23	0.1	0.24							FXR		RP11-125O18.1
chr4:128143243	chr4:127222088	0.92	0.99	rs6830726	C	T	0.08	0.23	0.1	0.25							9 altered motifs		RP11-125O18.1
chr4:128143560	chr4:127222405	0.92	0.99	rs6831703	G	C	0.08	0.23	0.1	0.25							CIZ,EWSR1-FLI1		RP11-125O18.1
chr4:128144034	chr4:127222879	0.92	0.99	rs116091768	T	C	0.08	0.23	0.1	0.25							Mef2,Ncx		RP11-125O18.1
chr4:128145527	chr4:127224372	0.92	0.99	rs62333956	A	G	0.05	0.23	0.1	0.25							HDAC2,p300		RP11-125O18.1
chr4:128146074	chr4:127224919	0.92	0.99	rs62333957	G	A	0.08	0.23	0.1	0.25							RREB-1		RP11-125O18.1
chr4:128146902	chr4:127225747	0.92	0.99	rs62333958	A	G	0.08	0.23	0.1	0.25							Hoxa7,Mef2		RP11-125O18.1
chr4:128147565	chr4:127226410	0.91	0.99	rs62333959	C	A,G,T	0.07	0.23	0.1	0.24									RP11-125O18.1
chr4:128150907	chr4:127229752	0.9	0.98	rs62335163	A	G	0.08	0.23	0.1	0.24							4 altered motifs		RP11-125O18.1
chr4:128151637	chr4:127230482	0.9	0.98	rs62335164	C	T	0.08	0.23	0.1	0.24					GATA2,P300		6 altered motifs		RP11-125O18.1
chr4:128151945	chr4:127230790	0.9	0.98	rs17229576	C	A	0.08	0.23	0.1	0.24							10 altered motifs		RP11-125O18.1
chr4:128155718	chr4:127234563	0.89	0.97	rs17295431	T	G	0.2	0.25	0.1	0.24							8 altered motifs		RP11-125O18.1
chr4:128157883	chr4:127236728	0.88	0.96	rs7655646	G	C	0.19	0.25	0.1	0.25			FAT, LNG, SKIN				ATF3		RP11-125O18.1
Query SNP: rs11740254 and variants with r2 >= 0.8
pos (hg19)	pos (hg38)	LD	LD	variant	Ref	Alt	AFR	AMR	ASN	EUR	SiPhy	Promoter	Enhancer	DNAse	Proteins	eQTL	Motifs	Drivers	GENCODE	dbSNP
		(r²)	(D')				freq	freq	freq	freq	cons	histone marks	histone marks		bound	tissues	changed	disrupted	genes	func annot
chr5:64301748	chr5:65005921	0.85	0.95	rs1213201	A	T	0.26	0.35	0.3	0.4			FAT, PLCNT				7 altered motifs		CWC27	intronic
chr5:64303547	chr5:65007720	0.84	0.95	rs1835671	C	T	0.26	0.34	0.29	0.4									CWC27	intronic
chr5:64306311	chr5:65010484	0.85	0.93	rs1309531	A	T	0.43	0.39	0.3	0.41			LIV, GI				Cdx,Pou5f1		CWC27	intronic
chr5:64307322	chr5:65011495	0.9	0.99	rs1312030	G	T	0.27	0.35	0.27	0.39			BRN, GI				ERalpha-a,RXRA		CWC27	intronic
chr5:64311542	chr5:65015715	0.89	0.98	rs266580	A	G	0.35	0.35	0.27	0.39		ESDR, FAT, BRN	12 organs				4 altered motifs		CWC27	intronic
chr5:64316593	chr5:65020766	0.91	0.99	rs166474	T	A	0.26	0.34	0.27	0.39			13 organs	4 organs			Hoxa7,NF-Y		2.2kb 3' of CWC27
chr5:64318336	chr5:65022509	0.91	0.99	rs266555	G	A	0.36	0.34	0.27	0.39			5 organs	HRT					3.9kb 3' of CWC27
chr5:64326787	chr5:65030960	1	1	rs11740254	T	C	0.39	0.36	0.27	0.41			BRST, MUS				Nanog		12kb 3' of CWC27
Query SNP: rs13180294 and variants with r2 >= 0.8
pos (hg19)	pos (hg38)	LD	LD	variant	Ref	Alt	AFR	AMR	ASN	EUR	SiPhy	Promoter	Enhancer	DNAse	Proteins	eQTL	Motifs	Drivers	GENCODE	dbSNP
		(r²)	(D')				freq	freq	freq	freq	cons	histone marks	histone marks		bound	tissues	changed	disrupted	genes	func annot
chr5:79307480	chr5:80011657	0.8	0.93	rs71635001	G	A	0	0.07	0.02	0.12									THBS4
chr5:79316414	chr5:80020591	0.8	0.93	rs72772256	G	A	0	0.07	0.02	0.12				ADRL			MZF1::1-4,Rad21		THBS4
chr5:79344618	chr5:80048795	0.82	0.97	rs16877442	T	C	0.04	0.1	0.23	0.13			ADRL	SKIN			CEBPB,STAT		THBS4	intronic
chr5:79349157	chr5:80053334	0.83	0.96	rs13174295	T	C	0	0.07	0.03	0.12									CTD-2201I18.1	intronic
chr5:79353428	chr5:80057605	0.91	0.99	rs2405136	T	C	0	0.07	0.01	0.12			FAT, BONE				5 altered motifs		CTD-2201I18.1	intronic
chr5:79360175	chr5:80064352	1	1	rs13180294	G	A	0	0.07	0.01	0.11			4 organs	7 organs			p53		CTD-2201I18.1	intronic
chr5:79362612	chr5:80066789	0.88	0.99	rs16877468	G	C	0.02	0.1	0.21	0.12			BLD				Cdc5		CTD-2201I18.1	intronic
Query SNP: rs67612840 and variants with r2 >= 0.8
pos (hg19)	pos (hg38)	LD	LD	variant	Ref	Alt	AFR	AMR	ASN	EUR	SiPhy	Promoter	Enhancer	DNAse	Proteins	eQTL	Motifs	Drivers	GENCODE	dbSNP
		(r²)	(D')				freq	freq	freq	freq	cons	histone marks	histone marks		bound	tissues	changed	disrupted	genes	func annot
chr6:10006415	chr6:10006182	0.95	0.97	rs9383325	A	C	0.17	0.24	0.17	0.26							Pou2f2		OFCC1
chr6:10018524	chr6:10018291	0.99	1	rs9396814	C	T	0.18	0.23	0.19	0.26							5 altered motifs		OFCC1
chr6:10018754	chr6:10018521	1	1	rs9383331	A	G	0.18	0.23	0.19	0.26							28 altered motifs		OFCC1
chr6:10028826	chr6:10028593	1	1	rs67612840	T	A	0.19	0.23	0.19	0.26			CRVX	CRVX	STAT3,GATA3,P300				OFCC1
chr6:10032730	chr6:10032497	0.83	0.98	rs10484259	C	G	0.17	0.2	0.19	0.24							SIX5		OFCC1
chr6:10034107	chr6:10033874	0.95	0.98	rs9396831	T	G	0.31	0.24	0.19	0.26		LNG, CRVX	5 organs	LNG,CRVX	GTF2F1				OFCC1
chr6:10034323	chr6:10034090	0.83	0.98	rs9383344	T	C	0.18	0.2	0.19	0.24		LNG, CRVX	ESDR, LIV				5 altered motifs		OFCC1
chr6:10035875	chr6:10035642	0.82	0.97	rs2327221	G	A	0.16	0.2	0.19	0.24			LNG						OFCC1
Query SNP: rs9366426 and variants with r2 >= 0.8
pos (hg19)	pos (hg38)	LD	LD	variant	Ref	Alt	AFR	AMR	ASN	EUR	SiPhy	Promoter	Enhancer	DNAse	Proteins	eQTL	Motifs	Drivers	GENCODE	dbSNP
		(r²)	(D')				freq	freq	freq	freq	cons	histone marks	histone marks		bound	tissues	changed	disrupted	genes	func annot
chr6:22059967	chr6:22059738	0.82	0.97	rs1207782	C	T	0.66	0.47	0.16	0.61			4 organs				HNF4		LINC00340	intronic
chr6:22060871	chr6:22060642	0.81	0.96	rs11367783	AG	A	0.67	0.47	0.16	0.61			BLD, THYM				Foxk1,HDAC2,Pou1f1		LINC00340	intronic
chr6:22061048	chr6:22060819	0.96	0.99	rs10456250	T	C	0.28	0.39	0.13	0.57							5 altered motifs		LINC00340	intronic
chr6:22064639	chr6:22064410	1	1	rs9366426	T	C	0.26	0.39	0.13	0.58			BLD				7 altered motifs		LINC00340	intronic
chr6:22067279	chr6:22067050	0.9	0.96	rs9350413	T	A	0.25	0.39	0.13	0.57		LNG	9 organs	4 organs	PU1		Gfi1,p300		LINC00340	intronic
chr6:22068174	chr6:22067945	0.92	0.99	rs4145443	G	T	0.25	0.38	0.13	0.56			6 organs	MUS			8 altered motifs		LINC00340	intronic
chr6:22072350	chr:	0.86	0.94	rs147020205	ACATC	A	0.27	0.39	0.13	0.57		11 organs	14 organs	7 organs			4 altered motifs		LINC00340	intronic
chr6:22079526	chr6:22079297	0.81	0.92	rs6934426	A	G	0.33	0.41	0.13	0.57			5 organs				4 altered motifs		LINC00340	intronic
chr6:22082263	chr6:22082034	0.82	0.93	rs12196123	C	T	0.33	0.41	0.12	0.57			9 organs	MUS,MUS	EBF1,IRF4,MEF2A		4 altered motifs		LINC00340	intronic
chr6:22086292	chr6:22086063	0.82	0.91	rs6901423	A	G	0.33	0.41	0.13	0.57							4 altered motifs		LINC00340	intronic
chr6:22087074	chr6:22086845	0.82	0.91	rs12212674	T	A	0.33	0.41	0.13	0.57							10 altered motifs		LINC00340	intronic
chr6:22090538	chr6:22090309	0.81	0.93	rs12191766	T	A	0.33	0.41	0.12	0.56							4 altered motifs		LINC00340	intronic
chr6:22096613	chr6:22096384	0.8	0.92	rs9366427	C	G	0.33	0.41	0.13	0.56			BLD, THYM				7 altered motifs		LINC00340	intronic
chr6:22097375	chr6:22097146	0.83	0.92	rs1034071	T	C	0.36	0.41	0.13	0.57							Elf3,PU.1,p300		LINC00340	intronic
Query SNP: rs961755 and variants with r2 >= 0.8
pos (hg19)	pos (hg38)	LD	LD	variant	Ref	Alt	AFR	AMR	ASN	EUR	SiPhy	Promoter	Enhancer	DNAse	Proteins	eQTL	Motifs	Drivers	GENCODE	dbSNP
		(r²)	(D')				freq	freq	freq	freq	cons	histone marks	histone marks		bound	tissues	changed	disrupted	genes	func annot
chr6:113393101	chr6:113071899	0.85	-0.94	rs6568749	T	G	0.75	0.72	0.57	0.8							Pou2f2		100kb 3' of U6
chr6:113395512	chr6:113074310	0.89	-0.95	rs6935658	A	T	0.81	0.73	0.57	0.81			9 organs	MUS			13 altered motifs		103kb 3' of U6
chr6:113402584	chr6:113081382	0.91	0.96	rs12525741	C	T	0.07	0.25	0.43	0.19							Foxj2,STAT		110kb 3' of U6
chr6:113405274	chr6:113084072	0.91	-0.96	rs6900829	T	C	0.73	0.72	0.57	0.81					MAFK		Foxp1,Nkx3,Sox		112kb 3' of U6
chr6:113405381	chr6:113084179	0.91	0.96	rs73537110	T	C	0.07	0.25	0.43	0.19					MAFK		11 altered motifs		113kb 3' of U6
chr6:113405582	chr6:113084380	0.91	0.96	rs73537112	G	C	0.07	0.25	0.43	0.19							NRSF,Pax-6		113kb 3' of U6
chr6:113405671	chr6:113084469	0.91	0.96	rs4945927	T	C	0.07	0.25	0.43	0.19							Evi-1		113kb 3' of U6
chr6:113407638	chr6:113086436	0.91	-0.96	rs7772428	A	C	0.73	0.72	0.57	0.81							Arid5b,Pou5f1,Sox		115kb 3' of U6
chr6:113411226	chr6:113090024	0.9	-0.95	rs139257209	C	CAT	0.8	0.73	0.57	0.8							5 altered motifs		118kb 3' of U6
chr6:113412672	chr6:113091470	0.91	-0.96	rs4945928	A	C	0.72	0.72	0.57	0.81							Foxa,Pou3f2		120kb 3' of U6
chr6:113413034	chr6:113091832	0.91	-0.96	rs2211360	A	C	0.66	0.7	0.57	0.81									120kb 3' of U6
chr6:113414336	chr6:113093134	0.91	-0.96	rs1539276	T	C	0.8	0.73	0.57	0.81			6 organs	SKIN			Pou5f1		122kb 3' of U6
chr6:113414361	chr6:113093159	0.91	-0.96	rs1539277	T	C	0.72	0.72	0.57	0.81			6 organs	SKIN			BDP1,Egr-1		122kb 3' of U6
chr6:113415267	chr6:113094065	0.91	-0.96	rs9384856	C	T	0.66	0.7	0.57	0.81			BRN, LNG, GI				14 altered motifs		122kb 3' of U6
chr6:113416118	chr6:113094916	0.91	-0.96	rs1418225	C	A	0.66	0.7	0.57	0.81			6 organs	7 organs					123kb 3' of U6
chr6:113417414	chr6:113096212	0.93	-0.97	rs10872088	T	A	0.66	0.7	0.57	0.81				MUS,MUS					125kb 3' of U6
chr6:113418095	chr6:113096893	0.93	-0.97	rs7760544	C	G	0.72	0.72	0.58	0.81							RXRA,Sox		125kb 3' of U6
chr6:113419266	chr6:113098064	0.85	-0.96	rs7765998	A	G	0.66	0.69	0.57	0.79							12 altered motifs		126kb 3' of U6
chr6:113419892	chr6:113098690	0.93	-0.97	rs1935371	T	G	0.73	0.72	0.57	0.81							OTX		127kb 3' of U6
chr6:113420774	chr6:113099572	0.93	-0.97	rs7747557	A	T	0.66	0.7	0.57	0.81							16 altered motifs		128kb 3' of U6
chr6:113420780	chr6:113099578	0.93	-0.97	rs7747558	A	T	0.66	0.7	0.57	0.81							10 altered motifs		128kb 3' of U6
chr6:113420826	chr6:113099624	0.93	-0.97	rs7767934	T	C	0.66	0.7	0.57	0.81									128kb 3' of U6
chr6:113420937	chr6:113099735	0.93	-0.97	rs7747885	C	G	0.66	0.7	0.57	0.81							Mef2,NRSF		128kb 3' of U6
chr6:113421075	chr6:113099873	0.93	-0.97	rs7768373	T	C	0.66	0.7	0.57	0.81							4 altered motifs		128kb 3' of U6
chr6:113421101	chr6:113099899	0.93	-0.97	rs7748201	C	T	0.66	0.7	0.57	0.81							Mef2,Pou2f2		128kb 3' of U6
chr6:113421190	chr6:113099988	0.93	-0.97	rs7748380	C	T	0.66	0.7	0.57	0.81							11 altered motifs		128kb 3' of U6
chr6:113421488	chr6:113100286	0.93	-0.97	rs9488065	T	C	0.66	0.7	0.57	0.81									129kb 3' of U6
chr6:113421946	chr6:113100744	0.93	-0.97	rs4398771	C	T	0.66	0.7	0.57	0.81							5 altered motifs		129kb 3' of U6
chr6:113422013	chr6:113100811	0.93	-0.97	rs7773735	T	G	0.66	0.7	0.57	0.81							13 altered motifs		129kb 3' of U6
chr6:113422128	chr6:113100926	0.93	-0.97	rs7773910	T	C	0.66	0.7	0.57	0.81							Foxd3,Pou2f2		129kb 3' of U6
chr6:113423060	chr6:113101858	0.93	-0.97	rs2347731	A	C	0.66	0.7	0.57	0.81							4 altered motifs		130kb 3' of U6
chr6:113423537	chr6:113102335	0.88	-0.96	rs6568754	T	A	0.65	0.69	0.57	0.8			BLD, VAS				BCL,LUN-1		131kb 3' of U6
chr6:113423678	chr6:113102476	0.87	-0.96	rs6568755	A	G	0.65	0.68	0.57	0.8			8 organs				Zbtb3		131kb 3' of U6
chr6:113423832	chr6:113102630	0.93	-0.97	rs2347732	G	A	0.82	0.73	0.57	0.81			10 organs	VAS			Foxq1,Pou1f1,TATA		131kb 3' of U6
chr6:113424163	chr6:113102961	0.93	-0.97	rs13193957	G	A	0.66	0.7	0.57	0.81		BLD	13 organs	16 organs	CFOS,CJUN,GATA2		Foxa,ZEB1,p300		131kb 3' of U6
chr6:113424259	chr6:113103057	0.93	0.97	rs4945487	C	G	0.07	0.26	0.43	0.19		BLD	12 organs	11 organs	CFOS,GATA2		GR		131kb 3' of U6
chr6:113424505	chr6:113103303	0.93	-0.97	rs6929827	G	A	0.66	0.7	0.57	0.81		BLD	10 organs	VAS					132kb 3' of U6
chr6:113425130	chr6:113103928	0.93	-0.97	rs7770043	G	A	0.66	0.7	0.57	0.81		FAT, BLD, SKIN	12 organs	14 organs	CFOS,CJUN		AP-1,PRDM1		132kb 3' of U6
chr6:113425275	chr6:113104073	0.93	-0.97	rs7770367	G	A	0.66	0.7	0.57	0.81		BLD	12 organs	4 organs	CFOS		Sox		132kb 3' of U6
chr6:113425720	chr6:113104518	0.93	-0.97	rs6568756	G	A	0.72	0.72	0.57	0.81		STRM	10 organs	VAS			CDP,PLZF		133kb 3' of U6
chr6:113425863	chr6:113104661	0.93	-0.97	rs6568757	A	G	0.66	0.7	0.57	0.81			8 organs	4 organs			SPIB,TEF-1		133kb 3' of U6
chr6:113425977	chr6:113104775	0.93	-0.97	rs6940842	C	T	0.66	0.7	0.57	0.81			8 organs	4 organs			Foxo,Foxp1		133kb 3' of U6
chr6:113426101	chr6:113104899	0.93	-0.97	rs6941335	G	A	0.66	0.7	0.57	0.81			7 organs	ESDR,BRN,LNG					133kb 3' of U6
chr6:113426929	chr6:113105727	0.93	-0.97	rs4307198	C	T	0.66	0.7	0.57	0.81			BLD				GR,Pax-6		134kb 3' of U6
chr6:113427805	chr6:113106603	0.93	-0.97	rs2347734	A	T	0.66	0.7	0.57	0.81		ESC					OTX,YY1		135kb 3' of U6
chr6:113428131	chr6:113106929	0.86	-0.99	rs7747689	A	G	0.63	0.68	0.55	0.78		ESC					4 altered motifs		135kb 3' of U6
chr6:113428148	chr6:113106946	0.98	-0.99	rs7768029	T	A	0.8	0.73	0.57	0.8		ESC					DBP,DMRT7,GR		135kb 3' of U6
chr6:113428160	chr6:113106958	0.88	-0.99	rs7768033	T	C	0.66	0.69	0.55	0.79		ESC					4 altered motifs		135kb 3' of U6
chr6:113428241	chr6:113107039	0.97	-0.99	rs7748257	G	A	0.67	0.7	0.57	0.81							5 altered motifs		135kb 3' of U6
chr6:113428547	chr6:113107345	0.96	-0.99	rs6933603	T	C	0.66	0.7	0.57	0.81							8 altered motifs		136kb 3' of U6
chr6:113428678	chr6:113107476	0.97	-0.99	rs6568758	G	A	0.72	0.72	0.57	0.81							9 altered motifs		136kb 3' of U6
chr6:113428705	chr6:113107503	0.97	-0.99	rs6568759	A	C	0.66	0.7	0.57	0.81							7 altered motifs		136kb 3' of U6
chr6:113428785	chr6:113107583	0.97	-0.99	rs6568760	G	A	0.72	0.72	0.57	0.81							GATA,PPAR		136kb 3' of U6
chr6:113428811	chr6:113107609	0.97	-0.98	rs6568761	G	A	0.66	0.7	0.57	0.8							AP-1,Mef2,Pax-4		136kb 3' of U6
chr6:113428823	chr6:113107621	0.95	-0.98	rs6568762	G	T	0.71	0.71	0.57	0.8							6 altered motifs		136kb 3' of U6
chr6:113429129	chr6:113107927	0.96	-0.98	rs4945488	G	A	0.66	0.7	0.57	0.8							AP-1,Pax-4,RREB-1		136kb 3' of U6
chr6:113429247	chr6:113108045	0.97	-0.99	rs6916166	A	G	0.66	0.7	0.57	0.81							E2F		136kb 3' of U6
chr6:113429706	chr:	0.97	-0.99	rs114233149	A	G	0.72	0.72	0.57	0.81							AIRE,Maf,RORalpha1		137kb 3' of U6
chr6:113430019	chr6:113108817	0.97	-0.99	rs4327726	G	A	0.66	0.7	0.57	0.81							5 altered motifs		137kb 3' of U6
chr6:113430441	chr6:113109239	0.97	-0.99	rs2347735	T	C	0.66	0.7	0.57	0.81							8 altered motifs		138kb 3' of U6
chr6:113431784	chr6:113110582	0.97	-0.99	rs2881709	T	C	0.66	0.7	0.57	0.81			LNG, BLD				GR,Gfi1		139kb 3' of U6
chr6:113433108	chr6:113111906	0.97	-0.99	rs6568767	T	C	0.66	0.7	0.57	0.81									140kb 3' of U6
chr6:113433447	chr6:113112245	0.97	-0.99	rs6921762	C	T	0.66	0.7	0.57	0.81			KID				BATF,SIX5,XBP-1		141kb 3' of U6
chr6:113433872	chr6:113112670	0.97	-0.99	rs6926906	C	T	0.66	0.7	0.57	0.81			STRM, KID, BONE				5 altered motifs		141kb 3' of U6
chr6:113434430	chr6:113113228	0.97	-0.99	rs9320430	G	T	0.66	0.7	0.57	0.81							RFX5,ZEB1		142kb 3' of U6
chr6:113435293	chr6:113114091	0.99	-1	rs7750921	T	C	0.72	0.72	0.57	0.81			BLD				HNF4,Ik-3,NF-kappaB		142kb 3' of U6
chr6:113435472	chr6:113114270	0.99	-1	rs2347736	G	C	0.66	0.7	0.57	0.81			BLD				CDP,GR,YY1		143kb 3' of U6
chr6:113436346	chr6:113115144	0.99	-1	rs6568768	T	C	0.8	0.73	0.57	0.81			BLD				11 altered motifs		144kb 3' of U6
chr6:113436381	chr6:113115179	0.99	-1	rs7454705	A	G	0.66	0.7	0.57	0.81			BLD						144kb 3' of U6
chr6:113436776	chr6:113115574	0.99	-1	rs4617020	A	G	0.72	0.72	0.57	0.81			BLD				HNF4,Nkx3,TCF4		144kb 3' of U6
chr6:113436822	chr6:113115620	0.99	-1	rs4530894	T	C	0.66	0.7	0.57	0.81			BLD						144kb 3' of U6
chr6:113437050	chr6:113115848	0.99	-1	rs6568769	T	C	0.66	0.7	0.57	0.81							Pax-4		144kb 3' of U6
chr6:113437407	chr6:113116205	0.99	-1	rs6903504	G	A	0.66	0.7	0.57	0.81							Cdx,Foxp1,Maf		145kb 3' of U6
chr6:113438423	chr6:113117221	0.99	-1	rs2473946	C	T	0.8	0.73	0.57	0.81							Arid5a,Foxj2		146kb 3' of U6
chr6:113438518	chr6:113117316	0.99	-1	rs2473945	T	A	0.66	0.7	0.57	0.81							4 altered motifs		146kb 3' of U6
chr6:113438672	chr6:113117470	0.99	-1	rs6913796	A	T	0.66	0.7	0.57	0.81				SKIN			TEF-1		146kb 3' of U6
chr6:113438795	chr6:113117593	0.99	-1	rs2473944	C	T	0.66	0.7	0.57	0.81				SKIN,MUS			Sox,p300		146kb 3' of U6
chr6:113439280	chr6:113118078	0.99	-1	rs2223871	C	T	0.66	0.7	0.57	0.81							Hltf,Nanog,TATA		146kb 3' of U6
chr6:113439398	chr6:113118196	0.99	1	rs1819135	G	A	0.08	0.26	0.43	0.19							Sox		147kb 3' of U6
chr6:113439736	chr6:113118534	0.96	-0.99	rs1581703	A	G	0.65	0.7	0.57	0.8							DMRT2		147kb 3' of U6
chr6:113439893	chr6:113118691	0.99	-1	rs2502361	C	A	0.66	0.7	0.57	0.81									147kb 3' of U6
chr6:113439964	chr6:113118762	0.98	-0.99	rs2502360	G	A	0.66	0.7	0.57	0.8							FAC1,RREB-1		147kb 3' of U6
chr6:113440240	chr6:113119038	0.99	1	rs1575049	G	A	0.34	0.3	0.43	0.19									147kb 3' of U6
chr6:113440585	chr6:113119383	0.99	1	rs2473940	T	C	0.34	0.3	0.43	0.19							12 altered motifs		148kb 3' of U6
chr6:113442852	chr6:113121650	0.99	1	rs2473939	C	A	0.28	0.28	0.43	0.19			12 organs						150kb 3' of U6
chr6:113443139	chr6:113121937	1	1	rs961755	G	T	0.33	0.3	0.42	0.2			12 organs				11 altered motifs		150kb 3' of U6
chr6:113443161	chr6:113121959	0.99	1	rs961754	T	G	0.33	0.3	0.43	0.19			12 organs	VAS			7 altered motifs		150kb 3' of U6
chr6:113443707	chr6:113122505	0.99	1	rs2473937	T	C	0.34	0.3	0.43	0.19		5 organs	12 organs	11 organs	GATA2				151kb 3' of U6
chr6:113443815	chr6:113122613	0.99	1	rs2473935	T	C	0.34	0.3	0.43	0.19		MUS, LNG, VAS	12 organs	VAS,LNG	GATA2		Egr-1		151kb 3' of U6
chr6:113444569	chr6:113123367	0.99	1	rs2473981	T	C	0.29	0.29	0.43	0.19			7 organs	BRN			Obox3		152kb 3' of U6
chr6:113453240	chr6:113132038	0.89	0.97	rs2473978	A	G	0.14	0.26	0.42	0.19							Maf,Msx-1,Smad		160kb 3' of U6
chr6:113454161	chr6:113132959	0.89	0.97	rs12528438	G	A	0.08	0.26	0.43	0.19							6 altered motifs		161kb 3' of U6
chr6:113458854	chr6:113137652	0.88	0.96	rs2502400	T	G	0.19	0.28	0.42	0.19		FAT, STRM, VAS	10 organs	10 organs	CFOS,MAX,NRSF		BCL,BDP1,LRH1		166kb 3' of U6
chr6:113463061	chr6:113141859	0.89	0.97	rs10485396	G	C	0.07	0.26	0.42	0.19							4 altered motifs		170kb 3' of U6
chr6:113463233	chr6:113142031	0.89	0.97	rs12530265	G	A	0.08	0.26	0.42	0.19									170kb 3' of U6
chr6:113464570	chr6:113143368	0.89	0.97	rs7763553	C	T	0.07	0.26	0.42	0.19				MUS			GATA,RFX5,Sox		172kb 3' of U6
chr6:113474155	chr6:113152953	0.89	0.97	rs35255343	AT	A	0.08	0.26	0.42	0.19							Arid5a,Foxa		181kb 3' of U6
chr6:113486248	chr6:113165046	0.88	0.96	rs73532500	A	C	0.09	0.26	0.4	0.19							TAL1		192kb 3' of RP11-437J19.1
Query SNP: rs4620141 and variants with r2 >= 0.8
pos (hg19)	pos (hg38)	LD	LD	variant	Ref	Alt	AFR	AMR	ASN	EUR	SiPhy	Promoter	Enhancer	DNAse	Proteins	eQTL	Motifs	Drivers	GENCODE	dbSNP
		(r²)	(D')				freq	freq	freq	freq	cons	histone marks	histone marks		bound	tissues	changed	disrupted	genes	func annot
chr6:138864489	chr6:138543352	0.82	0.98	rs7742292	T	C	0.82	0.59	0.65	0.44		7 organs	9 organs	HRT,SKIN			4 altered motifs		NHSL1	intronic
chr6:138864637	chr6:138543500	0.82	0.97	rs9399243	C	T	0.6	0.5	0.62	0.43		9 organs	9 organs	6 organs			5 altered motifs		NHSL1	intronic
chr6:138865324	chr6:138544187	0.95	0.97	rs4895532	C	T	0.35	0.44	0.6	0.4		10 organs	10 organs	4 organs	TCF4		4 altered motifs		NHSL1	intronic
chr6:138865948	chr6:138544811	0.83	0.98	rs9399244	T	C	0.22	0.54	0.65	0.44		13 organs	10 organs	11 organs			7 altered motifs	CDX2_1,Enh_c150	NHSL1	intronic
chr6:138868655	chr6:138547518	0.8	0.95	rs4243455	T	C	0.83	0.59	0.63	0.43			9 organs				6 altered motifs		NHSL1	intronic
chr6:138869568	chr6:138548431	1	1	rs4620141	C	T	0.83	0.55	0.63	0.4			4 organs				4 altered motifs		NHSL1	intronic
Query SNP: rs12702376 and variants with r2 >= 0.8
pos (hg19)	pos (hg38)	LD	LD	variant	Ref	Alt	AFR	AMR	ASN	EUR	SiPhy	Promoter	Enhancer	DNAse	Proteins	eQTL	Motifs	Drivers	GENCODE	dbSNP
		(r²)	(D')				freq	freq	freq	freq	cons	histone marks	histone marks		bound	tissues	changed	disrupted	genes	func annot
chr7:47756822	chr7:47717224	0.98	1	rs10281623	C	T	0.9	0.87	0.99	0.87							ZID,Zbtb12		HUS1
chr7:47761637	chr7:47722039	1	1	rs4724616	T	C	0.81	0.86	0.98	0.86			4 organs	IPSC,LNG			9 altered motifs		HUS1
chr7:47762188	chr7:47722590	1	1	rs10224924	C	T	0.9	0.87	0.99	0.86					ZNF263		TCF4		HUS1
chr7:47763369	chr7:47723771	0.86	1	rs7787022	T	C	0.89	0.87	0.98	0.84			ESDR, BLD, PLCNT				Nrf-2,TCF11::MafG,ZID		HUS1
chr7:47773965	chr7:47734367	0.99	1	rs6945610	T	C	0.91	0.86	0.99	0.86			6 organs	4 organs	7 bound proteins		6 altered motifs		HUS1
chr7:47775053	chr7:47735455	1	1	rs12702376	G	C	0.9	0.86	0.99	0.86			LNG, LIV				5 altered motifs		HUS1
Query SNP: rs7004112 and variants with r2 >= 0.8
pos (hg19)	pos (hg38)	LD	LD	variant	Ref	Alt	AFR	AMR	ASN	EUR	SiPhy	Promoter	Enhancer	DNAse	Proteins	eQTL	Motifs	Drivers	GENCODE	dbSNP
		(r²)	(D')				freq	freq	freq	freq	cons	histone marks	histone marks		bound	tissues	changed	disrupted	genes	func annot
chr8:78871804	chr8:77959569	0.85	-0.95	rs10099742	C	G	0.22	0.54	0.48	0.6				KID			11 altered motifs		189kb 5' of RP11-91P17.1
chr8:78879189	chr8:77966954	0.87	-0.97	rs4739185	A	G	0.27	0.54	0.48	0.6			STRM						181kb 5' of RP11-91P17.1
chr8:78880744	chr8:77968509	0.89	-0.98	rs13248588	A	G	0.21	0.54	0.48	0.6							5 altered motifs		180kb 5' of RP11-91P17.1
chr8:78883445	chr8:77971210	0.89	-0.98	rs1486923	T	C	0.27	0.54	0.48	0.6							Foxp1,Irf,Pou2f2		177kb 5' of RP11-91P17.1
chr8:78886202	chr8:77973967	0.83	-0.98	rs28655952	C	T	0.27	0.52	0.46	0.58							Sox		174kb 5' of RP11-91P17.1
chr8:78886360	chr8:77974125	0.88	-0.99	rs28439607	T	A	0.27	0.54	0.47	0.59									174kb 5' of RP11-91P17.1
chr8:78886841	chr8:77974606	0.9	-0.99	rs12545292	A	T	0.27	0.54	0.48	0.6							10 altered motifs		173kb 5' of RP11-91P17.1
chr8:78887060	chr8:77974825	0.89	-0.99	rs12543027	T	A	0.27	0.54	0.48	0.59							Pou5f1		173kb 5' of RP11-91P17.1
chr8:78903013	chr8:77990778	0.91	-0.99	rs10808823	G	A	0.27	0.54	0.48	0.6							GCM,Hoxa13,Hoxb13		157kb 5' of RP11-91P17.1
chr8:78906075	chr8:77993840	0.91	-0.99	rs10102662	T	C	0.21	0.54	0.48	0.6				ESDR			COMP1		154kb 5' of RP11-91P17.1
chr8:78909689	chr8:77997454	0.89	-0.97	rs34849429	G	T	0.27	0.54	0.48	0.6									151kb 5' of RP11-91P17.1
chr8:78910678	chr8:77998443	0.89	-0.99	rs201477799	AC	A	0.21	0.53	0.47	0.59							11 altered motifs		150kb 5' of RP11-91P17.1
chr8:78910939	chr8:77998704	0.91	-0.99	rs10957878	A	C	0.27	0.54	0.48	0.6							4 altered motifs		149kb 5' of RP11-91P17.1
chr8:78911919	chr8:77999684	0.91	-0.99	rs57034374	T	C	0.27	0.54	0.47	0.6							HNF4,PRDM1		148kb 5' of RP11-91P17.1
chr8:78911936	chr8:77999701	0.91	-0.99	rs60036550	G	A	0.27	0.54	0.47	0.6							PLZF,Pou2f2,Pou5f1		148kb 5' of RP11-91P17.1
chr8:78912778	chr8:78000543	0.91	-0.99	rs4739188	C	A	0.27	0.54	0.47	0.6			BRN	4 organs			Foxa		148kb 5' of RP11-91P17.1
chr8:78914112	chr8:78001877	0.91	-0.99	rs4610733	T	G	0.22	0.54	0.48	0.6			GI				5 altered motifs		146kb 5' of RP11-91P17.1
chr8:78918381	chr8:78006146	0.91	-0.99	rs4077569	C	A	0.27	0.54	0.47	0.6			STRM, GI				4 altered motifs		142kb 5' of RP11-91P17.1
chr8:78922806	chr8:78010571	0.91	-0.99	rs10283381	G	A	0.27	0.54	0.51	0.6							NF-kappaB		138kb 5' of RP11-91P17.1
chr8:78924203	chr8:78011968	0.98	0.99	rs13258410	T	C	0.39	0.39	0.5	0.38			6 organs	SKIN			4 altered motifs		136kb 5' of RP11-91P17.1
chr8:78924701	chr8:78012466	0.9	-0.99	rs5892636	TCTTC	T	0.28	0.54	0.5	0.6			ESDR, ESC, SKIN				EWSR1-FLI1,HDAC2		136kb 5' of RP11-91P17.1
chr8:78926741	chr8:78014506	0.98	0.99	rs10808824	G	A	0.4	0.39	0.5	0.38							Mef2		134kb 5' of RP11-91P17.1
chr8:78928417	chr8:78016182	0.91	-0.99	rs4739190	A	G	0.57	0.6	0.51	0.6							HDAC2,HNF4,Rad21		132kb 5' of RP11-91P17.1
chr8:78928787	chr8:78016552	0.97	0.99	rs6473079	A	G	0.4	0.39	0.5	0.38							Fox,Mef2		132kb 5' of RP11-91P17.1
chr8:78930177	chr8:78017942	0.98	0.99	rs11779013	T	C	0.4	0.39	0.5	0.38							6 altered motifs		130kb 5' of RP11-91P17.1
chr8:78930198	chr8:78017963	0.91	-0.99	rs13265358	T	C	0.27	0.54	0.5	0.6							Foxj2,GR,YY1		130kb 5' of RP11-91P17.1
chr8:78930579	chr8:78018344	0.91	-0.99	rs4412362	C	T	0.27	0.54	0.5	0.6							8 altered motifs		130kb 5' of RP11-91P17.1
chr8:78931987	chr8:78019752	0.91	-0.99	rs7833315	T	C	0.22	0.54	0.5	0.6							6 altered motifs		128kb 5' of RP11-91P17.1
chr8:78937473	chr8:78025238	0.99	1	rs7817567	A	T	0.31	0.36	0.5	0.38			BLD	MUS			DMRT4,Hoxb13,Irf		123kb 5' of RP11-91P17.1
chr8:78937569	chr8:78025334	0.91	-0.99	rs4397393	G	C	0.27	0.54	0.5	0.6			BLD	SKIN			5 altered motifs		123kb 5' of RP11-91P17.1
chr8:78939763	chr8:78027528	0.99	1	rs4276683	T	G	0.32	0.36	0.5	0.38			BLD						121kb 5' of RP11-91P17.1
chr8:78939877	chr8:78027642	0.99	1	rs4565449	T	C	0.32	0.36	0.5	0.38			STRM, BLD				4 altered motifs		120kb 5' of RP11-91P17.1
chr8:78939959	chr8:78027724	0.98	1	rs3884556	T	C	0.32	0.36	0.5	0.38			STRM, BLD				16 altered motifs		120kb 5' of RP11-91P17.1
chr8:78941331	chr8:78029096	1	1	rs7004112	G	T	0.32	0.36	0.5	0.38							7 altered motifs		119kb 5' of RP11-91P17.1
chr8:78941534	chr8:78029299	0.91	-0.99	rs62508223	G	C	0.22	0.54	0.5	0.6							9 altered motifs		119kb 5' of RP11-91P17.1
chr8:78941659	chr8:78029424	0.99	1	rs62508224	C	T	0.32	0.36	0.5	0.38			ESDR				Foxp3,ZEB1		119kb 5' of RP11-91P17.1
chr8:78942084	chr8:78029849	0.87	-0.99	rs9657044	A	G	0.27	0.55	0.5	0.59							HDAC2,Irf,Zfp105		118kb 5' of RP11-91P17.1
chr8:78942271	chr8:78030036	0.91	-0.99	rs9657126	T	C	0.27	0.54	0.5	0.6				ESDR,PLCNT			9 altered motifs		118kb 5' of RP11-91P17.1
chr8:78942561	chr8:78030326	0.91	-0.99	rs28764193	T	G	0.27	0.54	0.5	0.6							11 altered motifs		118kb 5' of RP11-91P17.1
chr8:78942894	chr8:78030659	0.99	1	rs4573260	T	C	0.21	0.36	0.5	0.38							4 altered motifs		117kb 5' of RP11-91P17.1
chr8:78944192	chr8:78031957	0.99	1	rs4380933	A	G	0.21	0.36	0.5	0.38							PLZF,Pax-6,STAT		116kb 5' of RP11-91P17.1
chr8:78944681	chr8:78032446	0.99	1	rs13254874	T	C	0.21	0.36	0.5	0.38							8 altered motifs		116kb 5' of RP11-91P17.1
chr8:78945481	chr8:78033246	0.91	-0.99	rs1871788	T	C	0.37	0.55	0.5	0.6		FAT	SKIN, LNG						115kb 5' of RP11-91P17.1
chr8:78945590	chr8:78033355	0.99	1	rs1471585	A	G	0.21	0.36	0.5	0.38		FAT	SKIN, LNG	HRT,LNG			7 altered motifs		115kb 5' of RP11-91P17.1
chr8:78945804	chr8:78033569	0.97	1	rs10646223	A	AAC	0.21	0.36	0.5	0.37				4 organs			8 altered motifs		115kb 5' of RP11-91P17.1
chr8:78945806	chr:	0.98	1	rs72322012	C	7-mer	0.21	0.36	0.5	0.38		FAT	FAT, SKIN, LNG	4 organs					115kb 5' of RP11-91P17.1
chr8:78946230	chr8:78033995	0.99	1	rs9643732	G	A	0.21	0.36	0.5	0.38			FAT						114kb 5' of RP11-91P17.1
chr8:78946400	chr8:78034165	0.99	1	rs13266874	T	C	0.21	0.36	0.5	0.38			FAT				ERalpha-a,Esr2		114kb 5' of RP11-91P17.1
chr8:78946874	chr8:78034639	0.83	1	rs1947897	G	C	0.13	0.34	0.5	0.34									113kb 5' of RP11-91P17.1
chr8:78947372	chr8:78035137	0.99	1	rs7828745	G	A	0.22	0.36	0.5	0.38							4 altered motifs		113kb 5' of RP11-91P17.1
chr8:78948481	chr8:78036246	0.99	1	rs2101106	A	C	0.22	0.36	0.51	0.38							5 altered motifs		112kb 5' of RP11-91P17.1
chr8:78948855	chr8:78036620	0.99	0.99	rs6999835	T	C	0.24	0.36	0.51	0.38							Sox		111kb 5' of RP11-91P17.1
chr8:78950551	chr8:78038316	0.96	1	rs9643733	G	T	0.23	0.35	0.5	0.37							NF-kappaB,Sox,Zfp410		110kb 5' of RP11-91P17.1
chr8:78950552	chr8:78038317	0.96	1	rs9643734	C	T	0.23	0.35	0.5	0.37							4 altered motifs		110kb 5' of RP11-91P17.1
chr8:78951278	chr8:78039043	0.99	1	rs2368508	T	C	0.25	0.36	0.51	0.38				KID			PU.1,VDR		109kb 5' of RP11-91P17.1
chr8:78951749	chr8:78039514	0.99	1	rs6995342	A	T	0.25	0.36	0.51	0.38							GR,HNF1,Maf		109kb 5' of RP11-91P17.1
chr8:78952371	chr8:78040136	0.99	1	rs9643433	T	A	0.25	0.36	0.51	0.38							7 altered motifs		108kb 5' of RP11-91P17.1
chr8:78953269	chr8:78041034	0.96	0.99	rs35703732	C	T	0.14	0.36	0.51	0.38							LUN-1		107kb 5' of RP11-91P17.1
chr8:78953437	chr8:78041202	0.94	0.98	rs33987699	A	C	0.62	0.43	0.51	0.38									107kb 5' of RP11-91P17.1
chr8:78954214	chr8:78041979	0.93	0.98	rs13255746	A	T	0.14	0.36	0.51	0.38							10 altered motifs		106kb 5' of RP11-91P17.1
chr8:78954480	chr8:78042245	0.93	0.98	rs13263569	A	G	0.14	0.36	0.51	0.38				THYM			CIZ,PPAR,Smad		106kb 5' of RP11-91P17.1
chr8:78955014	chr8:78042779	0.93	0.98	rs1481511	A	G	0.14	0.36	0.51	0.38							6 altered motifs		105kb 5' of RP11-91P17.1
chr8:78956394	chr8:78044159	0.93	0.98	rs2200014	A	T	0.14	0.36	0.51	0.38							Foxp1,Whn		104kb 5' of RP11-91P17.1
chr8:78956658	chr8:78044423	0.93	0.98	rs2219968	G	A	0.14	0.36	0.51	0.38							VDR		104kb 5' of RP11-91P17.1
chr8:78957333	chr8:78045098	0.93	0.98	rs28551624	A	G	0.67	0.43	0.51	0.38									103kb 5' of RP11-91P17.1
chr8:78957669	chr8:78045434	0.93	0.98	rs13262830	C	T	0.62	0.43	0.51	0.38							25 altered motifs		103kb 5' of RP11-91P17.1
chr8:78958272	chr8:78046037	0.93	0.98	rs13266678	T	C	0.62	0.42	0.51	0.38									102kb 5' of RP11-91P17.1
chr8:78958512	chr8:78046277	0.92	0.97	rs1121551	A	G	0.24	0.38	0.51	0.38							NRSF		102kb 5' of RP11-91P17.1
chr8:78958699	chr8:78046464	0.93	0.98	rs1121552	T	G	0.14	0.36	0.51	0.38							6 altered motifs		102kb 5' of RP11-91P17.1
chr8:78958925	chr8:78046690	0.93	0.98	rs11783293	G	T	0.14	0.36	0.51	0.38									101kb 5' of RP11-91P17.1
chr8:78959166	chr8:78046931	0.93	0.97	rs7465474	C	T	0.14	0.36	0.51	0.38							4 altered motifs		101kb 5' of RP11-91P17.1
chr8:78959566	chr8:78047331	0.93	0.98	rs11777219	A	T	0.14	0.36	0.51	0.38							14 altered motifs		101kb 5' of RP11-91P17.1
chr8:78959671	chr8:78047436	0.93	0.98	rs1073444	T	C	0.14	0.36	0.51	0.38							7 altered motifs		101kb 5' of RP11-91P17.1
chr8:78959745	chr8:78047510	0.93	0.98	rs1073445	T	C	0.14	0.36	0.51	0.38							Nkx2		101kb 5' of RP11-91P17.1
chr8:78960780	chr8:78048545	0.93	0.97	rs12056841	G	A	0.14	0.36	0.51	0.38							6 altered motifs		100kb 5' of RP11-91P17.1
chr8:78961915	chr8:78049680	0.93	0.98	rs12056577	A	C	0.14	0.36	0.51	0.38									98kb 5' of RP11-91P17.1
chr8:78962583	chr8:78050348	0.93	0.98	rs34130020	T	C	0.14	0.36	0.51	0.38				ESDR					98kb 5' of RP11-91P17.1
chr8:78962648	chr8:78050413	0.93	0.98	rs12056614	A	T	0.15	0.36	0.51	0.38									98kb 5' of RP11-91P17.1
chr8:78962821	chr8:78050586	0.93	0.98	rs12056471	T	C	0.14	0.36	0.51	0.38							NF-E2,Nrf-2,Pax-4		98kb 5' of RP11-91P17.1
chr8:78962903	chr8:78050668	0.92	0.96	rs4460363	G	A	0.62	0.43	0.51	0.38							RFX5,Sox		97kb 5' of RP11-91P17.1
chr8:78963292	chr8:78051057	0.92	0.96	rs2128014	T	C	0.14	0.36	0.51	0.38									97kb 5' of RP11-91P17.1
chr8:78963505	chr8:78051270	0.93	0.98	rs36124379	T	C	0.14	0.36	0.51	0.38							9 altered motifs		97kb 5' of RP11-91P17.1
chr8:78963968	chr8:78051733	0.93	0.98	rs35551201	G	A	0.14	0.36	0.5	0.38							AP-1,Pbx-1		96kb 5' of RP11-91P17.1
chr8:78964111	chr8:78051876	0.93	0.98	rs59541962	G	C	0.14	0.36	0.52	0.38							8 altered motifs		96kb 5' of RP11-91P17.1
chr8:78964242	chr8:78052007	0.91	0.98	rs201215401	T	TTTA	0.15	0.36	0.49	0.37							26 altered motifs		96kb 5' of RP11-91P17.1
chr8:78964507	chr8:78052272	0.89	0.97	rs2128016	C	T	0.14	0.35	0.5	0.37							ZBTB7A		96kb 5' of RP11-91P17.1
chr8:78964682	chr8:78052447	0.93	0.98	rs2128017	T	G	0.14	0.36	0.51	0.38							7 altered motifs		96kb 5' of RP11-91P17.1
chr8:78966267	chr8:78054032	0.93	0.98	rs67368685	A	G	0.14	0.37	0.51	0.38							6 altered motifs		94kb 5' of RP11-91P17.1
chr8:78966585	chr8:78054350	0.93	0.98	rs13281300	A	G	0.14	0.36	0.51	0.38							7 altered motifs		94kb 5' of RP11-91P17.1
chr8:78967087	chr8:78054852	0.92	0.98	rs147442054	G	A	0.14	0.35	0.51	0.37							Cdx2,Foxj2,Hoxb8		93kb 5' of RP11-91P17.1
chr8:78967982	chr8:78055747	0.92	0.97	rs4570146	T	A	0.14	0.36	0.51	0.38							GR,SP1		92kb 5' of RP11-91P17.1
chr8:78969920	chr8:78057685	0.92	0.97	rs16939594	T	A	0.14	0.36	0.51	0.38				ESDR			5 altered motifs		90kb 5' of RP11-91P17.1
chr8:78970064	chr8:78057829	0.92	0.97	rs13260890	G	A	0.14	0.36	0.51	0.38									90kb 5' of RP11-91P17.1
chr8:78970258	chr8:78058023	0.92	0.97	rs13263076	T	C	0.14	0.36	0.51	0.38							COMP1,Smad		90kb 5' of RP11-91P17.1
chr8:78971571	chr8:78059336	0.92	0.97	rs11783780	A	T	0.14	0.36	0.51	0.38							5 altered motifs		89kb 5' of RP11-91P17.1
chr8:78971578	chr8:78059343	0.91	0.96	rs11776951	G	C	0.14	0.36	0.51	0.38							6 altered motifs		89kb 5' of RP11-91P17.1
chr8:78971658	chr8:78059423	0.92	0.97	rs4639505	A	G	0.13	0.36	0.51	0.38							Cdx2,Foxj2		89kb 5' of RP11-91P17.1
chr8:78971715	chr8:78059480	0.92	0.97	rs4541901	G	A	0.61	0.43	0.51	0.38							10 altered motifs		89kb 5' of RP11-91P17.1
chr8:78971965	chr8:78059730	0.92	0.97	rs4333586	C	T	0.14	0.36	0.51	0.38							5 altered motifs		88kb 5' of RP11-91P17.1
chr8:78972260	chr8:78060025	0.92	0.97	rs6982487	C	A	0.14	0.36	0.51	0.38							Foxp1,HNF1		88kb 5' of RP11-91P17.1
chr8:78972362	chr8:78060127	0.92	0.97	rs6982916	G	A	0.14	0.36	0.51	0.38							6 altered motifs		88kb 5' of RP11-91P17.1
chr8:78972524	chr8:78060289	0.92	0.97	rs6473084	T	C	0.14	0.36	0.51	0.38							FXR,Foxp1,NF-kappaB		88kb 5' of RP11-91P17.1
chr8:78972826	chr8:78060591	0.92	0.97	rs7818353	C	A	0.13	0.36	0.51	0.38							ERalpha-a,Pax-4,STAT		88kb 5' of RP11-91P17.1
chr8:78974231	chr8:78061996	0.92	0.97	rs12679679	T	C	0.14	0.36	0.51	0.38									86kb 5' of RP11-91P17.1
chr8:78974505	chr8:78062270	0.91	0.97	rs6473085	T	A	0.14	0.36	0.51	0.37							Foxp1		86kb 5' of RP11-91P17.1
chr8:78974646	chr8:78062411	0.92	0.97	rs6473086	T	C	0.67	0.43	0.51	0.38							8 altered motifs		86kb 5' of RP11-91P17.1
chr8:78974859	chr8:78062624	0.92	0.97	rs6473087	A	G	0.14	0.36	0.51	0.38							4 altered motifs		85kb 5' of RP11-91P17.1
chr8:78975258	chr8:78063023	0.92	0.97	rs13276048	G	A	0.14	0.36	0.52	0.38									85kb 5' of RP11-91P17.1
chr8:78975338	chr8:78063103	0.92	0.97	rs13276123	G	A	0.13	0.36	0.51	0.38							HEY1,TATA		85kb 5' of RP11-91P17.1
chr8:78975616	chr8:78063381	0.92	0.97	rs13248763	G	A	0.14	0.36	0.51	0.38					MAFK		4 altered motifs		85kb 5' of RP11-91P17.1
chr8:78975745	chr8:78063510	0.92	0.97	rs13248343	A	G	0.14	0.36	0.51	0.38					MAFK		NRSF,Sin3Ak-20		85kb 5' of RP11-91P17.1
chr8:78976117	chr8:78063882	0.92	0.97	rs7003597	A	G	0.14	0.36	0.51	0.38							Eomes,TBX5		84kb 5' of RP11-91P17.1
chr8:78976336	chr8:78064101	0.92	0.97	rs7003907	A	G	0.14	0.37	0.51	0.38							Nkx3,RFX5		84kb 5' of RP11-91P17.1
chr8:78976979	chr8:78064744	0.91	0.97	rs35392911	C	A	0.13	0.36	0.51	0.38							GATA		83kb 5' of RP11-91P17.1
chr8:78977693	chr8:78065458	0.91	0.97	rs35174414	C	T	0.13	0.36	0.51	0.37				SKIN,BLD,BRST			14 altered motifs		83kb 5' of RP11-91P17.1
chr8:78979111	chr8:78066876	0.81	0.92	rs7822053	A	G	0.62	0.44	0.51	0.39							Ets,Irf,SP1		81kb 5' of RP11-91P17.1
chr8:78980839	chr8:78068604	0.83	0.95	rs199596554	G	GA	0.62	0.44	0.52	0.4							4 altered motifs		79kb 5' of RP11-91P17.1
chr8:78980842	chr8:78068607	0.83	0.95	rs34088216	A	AG	0.62	0.44	0.51	0.4							6 altered motifs		79kb 5' of RP11-91P17.1
Query SNP: rs4837104 and variants with r2 >= 0.8
pos (hg19)	pos (hg38)	LD	LD	variant	Ref	Alt	AFR	AMR	ASN	EUR	SiPhy	Promoter	Enhancer	DNAse	Proteins	eQTL	Motifs	Drivers	GENCODE	dbSNP
		(r²)	(D')				freq	freq	freq	freq	cons	histone marks	histone marks		bound	tissues	changed	disrupted	genes	func annot
chr9:129433929	chr9:126671650	1	1	rs4837104	A	G	0.94	0.87	0.72	0.94		ESDR	12 organs	7 organs			6 altered motifs		LMX1B	intronic
Query SNP: rs3132309 and variants with r2 >= 0.8
pos (hg19)	pos (hg38)	LD	LD	variant	Ref	Alt	AFR	AMR	ASN	EUR	SiPhy	Promoter	Enhancer	DNAse	Proteins	eQTL	Motifs	Drivers	GENCODE	dbSNP
		(r²)	(D')				freq	freq	freq	freq	cons	histone marks	histone marks		bound	tissues	changed	disrupted	genes	func annot
chr9:137433436	chr9:134541590	1	1	rs3132309	C	A	0.48	0.39	0.38	0.38			MUS				7 altered motifs		RP11-473E2.4	intronic
Query SNP: rs166976 and variants with r2 >= 0.8
pos (hg19)	pos (hg38)	LD	LD	variant	Ref	Alt	AFR	AMR	ASN	EUR	SiPhy	Promoter	Enhancer	DNAse	Proteins	eQTL	Motifs	Drivers	GENCODE	dbSNP
		(r²)	(D')				freq	freq	freq	freq	cons	histone marks	histone marks		bound	tissues	changed	disrupted	genes	func annot
chr10:90013195	chr10:88253438	0.8	0.99	rs558443	C	A	0.92	0.89	0.81	0.77			8 organs	BLD			5 altered motifs		20kb 3' of RNLS
chr10:90022399	chr10:88262642	0.81	-1	rs9665166	G	A	0.11	0.14	0.22	0.23			BLD		MAFF,MAFK		4 altered motifs		11kb 3' of RNLS
chr10:90023033	chr10:88263276	0.94	-0.98	rs10509540	T	C	0.2	0.23	0.23	0.27				BLD	PU1		HMG-IY,Hand1,Smad3		11kb 3' of RNLS
chr10:90024599	chr10:88264842	1	1	rs166976	G	A	0.8	0.78	0.78	0.73							16 altered motifs		9kb 3' of RNLS
chr10:90030119	chr10:88270362	0.93	0.99	rs286487	G	A	0.78	0.77	0.77	0.73		GI	10 organs	BLD			GATA,Maf,p53		3.5kb 3' of RNLS
chr10:90035654	chr10:88275897	0.81	-0.95	rs12416116	C	A	0.35	0.24	0.23	0.29							5 altered motifs		RNLS	intronic
chr10:90047350	chr10:88287593	0.92	-0.97	rs2018705	T	G	0.22	0.21	0.23	0.26							EBF,NF-kappaB,Nkx2		RNLS	intronic
chr10:90051035	chr10:88291278	0.93	-0.98	rs7068821	G	T	0.21	0.21	0.23	0.26			BLD, THYM				Foxd1,Foxj1,Pou1f1		RNLS	intronic
chr10:90051317	chr10:88291560	0.91	-0.97	rs60888743	A	G	0.37	0.22	0.23	0.26			5 organs				NF-E2,Pax-5		RNLS	intronic
Query SNP: rs10786330 and variants with r2 >= 0.8
pos (hg19)	pos (hg38)	LD	LD	variant	Ref	Alt	AFR	AMR	ASN	EUR	SiPhy	Promoter	Enhancer	DNAse	Proteins	eQTL	Motifs	Drivers	GENCODE	dbSNP
		(r²)	(D')				freq	freq	freq	freq	cons	histone marks	histone marks		bound	tissues	changed	disrupted	genes	func annot
chr10:99013312	chr10:97253555	0.85	0.93	rs10882883	A	G	0.18	0.61	0.72	0.64							GATA		ARHGAP19	intronic
chr10:99017568	chr10:97257811	0.8	0.9	rs11352764	CT	C	0.18	0.59	0.71	0.63			GI				5 altered motifs		ARHGAP19	intronic
chr10:99019144	chr10:97259387	0.85	0.93	rs3740522	C	T	0.18	0.61	0.72	0.64		GI	GI, LIV	GI,GI,GI			Ets,Foxd1		ARHGAP19	intronic
chr10:99025611	chr10:97265854	0.85	0.93	rs10882884	T	A	0.18	0.61	0.72	0.64									ARHGAP19	intronic
chr10:99026509	chr10:97266752	0.85	0.93	rs7072078	G	A	0.29	0.62	0.72	0.64							STAT		ARHGAP19	intronic
chr10:99032843	chr10:97273086	0.82	0.91	rs10748692	C	T	0.28	0.62	0.69	0.64							6 altered motifs		ARHGAP19	intronic
chr10:99045890	chr10:97286133	0.88	0.94	rs10882889	A	G	0.18	0.61	0.72	0.64									ARHGAP19	intronic
chr10:99047712	chr10:97287955	0.83	0.93	rs11189100	G	A	0.4	0.63	0.71	0.63							LUN-1		ARHGAP19	intronic
chr10:99048262	chr10:97288505	0.8	0.93	rs10882890	G	A	0.52	0.64	0.75	0.65							5 altered motifs		ARHGAP19	intronic
chr10:99049010	chr:	0.8	0.94	rs79210048	T	G	0.53	0.64	0.75	0.66							6 altered motifs		ARHGAP19	intronic
chr10:99054387	chr10:97294630	0.89	0.95	rs10786324	A	G	0.17	0.61	0.73	0.64							Pbx-1,TCF4		2kb 5' of ARHGAP19
chr10:99056190	chr10:97296433	0.89	0.95	rs10748694	A	T	0.17	0.61	0.72	0.64							4 altered motifs		3.8kb 5' of ARHGAP19
chr10:99056921	chr10:97297164	0.88	0.94	rs10736116	C	G	0.29	0.62	0.72	0.63							4 altered motifs		4.5kb 5' of ARHGAP19
chr10:99059645	chr10:97299888	0.91	0.95	rs10882891	C	A	0.24	0.61	0.69	0.63							Cart1		7.2kb 5' of ARHGAP19
chr10:99061386	chr10:97301629	0.93	0.97	rs12221430	C	G	0.24	0.61	0.69	0.63			LIV		FOXA2		Egr-1,HDAC2		9kb 5' of ARHGAP19
chr10:99065881	chr10:97306124	0.94	0.97	rs35363447	AATTT	A	0.24	0.6	0.69	0.63							27 altered motifs		13kb 5' of FRAT1
chr10:99068738	chr10:97308981	0.84	0.96	rs10786325	C	G	0.28	0.58	0.65	0.61							5 altered motifs		10kb 5' of FRAT1
chr10:99069493	chr10:97309736	0.94	0.97	rs11189120	G	T	0.3	0.61	0.69	0.63			LIV				RXRA,TATA		9.5kb 5' of FRAT1
chr10:99070377	chr10:97310620	0.93	0.97	rs10786326	G	A	0.31	0.61	0.69	0.64							Mef2,Pou2f2		8.6kb 5' of FRAT1
chr10:99071408	chr10:97311651	0.94	0.97	rs10786327	C	T	0.31	0.61	0.69	0.63							STAT,TLX1::NFIC		7.6kb 5' of FRAT1
chr10:99072507	chr10:97312750	0.94	0.97	rs4919087	A	G	0.31	0.61	0.69	0.63			BLD						6.5kb 5' of FRAT1
chr10:99072595	chr10:97312838	0.94	0.97	rs11189122	G	A	0.31	0.61	0.69	0.63			BLD				AP-1,ATF3,LXR		6.4kb 5' of FRAT1
chr10:99074100	chr10:97314343	0.9	0.99	rs10882894	C	A	0.29	0.58	0.65	0.61							Nr2f2,Zbtb12		4.9kb 5' of FRAT1
chr10:99074621	chr10:97314864	1	1	rs10786329	G	A	0.25	0.61	0.69	0.63				4 organs			DMRT3,Irx		4.4kb 5' of FRAT1
chr10:99074649	chr10:97314892	1	1	rs7067835	T	C	0.26	0.61	0.68	0.63		BLD	FAT, BLD	4 organs			4 altered motifs		4.4kb 5' of FRAT1
chr10:99074959	chr10:97315202	1	1	rs10786330	C	A	0.25	0.61	0.69	0.63				BLD			4 altered motifs		4.1kb 5' of FRAT1
chr10:99076321	chr10:97316564	0.82	-1	rs7089634	C	T	0.11	0.27	0.11	0.32			BLD				Pax-4,Zbtb3,p53		2.7kb 5' of FRAT1
chr10:99078745	chr10:97318988	0.98	0.99	rs3740512	C	T	0.37	0.62	0.69	0.63		24 organs		53 organs	10 bound proteins		Foxp1,RREB-1		276bp 5' of FRAT1
chr10:99079023	chr10:97319266	0.96	0.99	rs11189127	G	A	0.39	0.62	0.69	0.64		24 organs		53 organs	25 bound proteins				FRAT1	5'-UTR
chr10:99080585	chr10:97320828	0.92	0.99	rs3781373	C	T	0.48	0.64	0.72	0.65		20 organs	15 organs	12 organs			Arid5b,Pbx-1		FRAT1	3'-UTR
chr10:99080981	chr:	0.92	0.99	rs78094641	G	T	0.48	0.64	0.72	0.65		20 organs	16 organs	15 organs			Sin3Ak-20		FRAT1	3'-UTR
chr10:99082360	chr10:97322603	0.92	0.99	rs7901853	T	C	0.48	0.65	0.72	0.65		BLD, BRN	8 organs				Brachyury,E2A,Osr		687bp 3' of FRAT1
chr10:99083760	chr10:97324003	0.86	-0.99	rs6584116	A	G	0.14	0.31	0.28	0.34			4 organs				9 altered motifs		2.1kb 3' of FRAT1
chr10:99084426	chr10:97324669	0.98	0.99	rs61863767	C	T	0.25	0.61	0.69	0.63			BLD, GI				4 altered motifs		2.8kb 3' of FRAT1
chr10:99085835	chr10:97326078	0.88	-0.99	rs11189131	G	A	0.14	0.28	0.17	0.34			8 organs	ADRL			Foxm1,TCF12		4.2kb 3' of FRAT1
chr10:99086195	chr10:97326438	0.97	-0.99	rs11189132	G	C	0.23	0.32	0.31	0.36			6 organs	BLD			Pitx2,SP2		4.5kb 3' of FRAT1
chr10:99086361	chr10:97326604	0.97	-0.99	rs7078288	C	T	0.23	0.32	0.31	0.36			6 organs				7 altered motifs		4.7kb 3' of FRAT1
chr10:99086917	chr10:97327160	0.97	-0.99	rs10882897	T	C	0.23	0.33	0.31	0.36							EBF,Ik-1		5.2kb 3' of FRAT1
chr10:99087330	chr10:97327573	0.97	-0.99	rs10882898	G	A	0.2	0.32	0.31	0.36				SKIN,LIV,BLD	4 bound proteins		Hlx1,TATA		4.9kb 3' of FRAT2
chr10:99087535	chr10:97327778	0.97	-0.99	rs10536157	TCA	T	0.2	0.32	0.31	0.36				5 organs	GATA1		Foxa,HNF1,NRSF		4.7kb 3' of FRAT2
chr10:99087905	chr10:97328148	0.97	-0.99	rs4919089	G	A	0.2	0.32	0.31	0.36		GI, LNG, LIV	10 organs	9 organs	8 bound proteins				4.3kb 3' of FRAT2
chr10:99088181	chr10:97328424	0.97	-0.99	rs10786332	C	T	0.19	0.32	0.31	0.36							Pax-4		4.1kb 3' of FRAT2
chr10:99088419	chr10:97328662	0.97	-0.99	rs4919090	C	G	0.19	0.32	0.31	0.36		4 organs	12 organs	5 organs	POL24H8,KAP1		5 altered motifs		3.8kb 3' of FRAT2
chr10:99088682	chr10:97328925	0.97	-0.99	rs4919091	T	A	0.19	0.32	0.31	0.36		5 organs	12 organs	12 organs	13 bound proteins		Myb,NF-Y		3.6kb 3' of FRAT2
chr10:99089296	chr10:97329539	0.97	-0.99	rs7076523	T	C	0.22	0.33	0.31	0.36			12 organs	GI,GI			4 altered motifs	KLF4_1,Enh_c54	3kb 3' of FRAT2
chr10:99089538	chr10:97329781	0.92	-0.99	rs7080275	T	C	0.22	0.31	0.31	0.35			11 organs				5 altered motifs		2.7kb 3' of FRAT2
chr10:99090390	chr10:97330633	0.97	-0.99	rs10786333	A	G	0.23	0.32	0.31	0.36							Maf		1.9kb 3' of FRAT2
chr10:99091369	chr10:97331612	0.94	0.98	rs945187	G	A	0.23	0.6	0.69	0.63		11 organs	18 organs				Eomes,TBX5,ZEB1		885bp 3' of FRAT2
chr10:99091766	chr10:97332009	0.88	0.99	rs945189	C	G	0.25	0.62	0.69	0.66		17 organs	17 organs				Roaz		488bp 3' of FRAT2
chr10:99095208	chr10:97335451	0.95	0.98	rs12571098	A	G	0.22	0.61	0.69	0.63		18 organs	13 organs	14 organs			GR,LF-A1		RP11-452K12.4
chr10:99095544	chr10:97335787	0.96	0.98	rs12413688	A	G	0.23	0.61	0.69	0.63		ESC, IPSC, BLD	11 organs				GR,Smad		RP11-452K12.4
chr10:99095687	chr10:97335930	0.95	0.98	rs11189137	C	G	0.22	0.62	0.69	0.63		ESC, IPSC, BLD	11 organs				5 altered motifs		RP11-452K12.4
chr10:99095945	chr10:97336188	0.97	0.98	rs10882899	G	C	0.22	0.61	0.69	0.63				10 organs			Myb,Nkx2		RP11-452K12.4
chr10:99097191	chr10:97337434	0.96	0.98	rs4917766	G	A	0.22	0.61	0.69	0.63		6 organs	19 organs	11 organs	TAF1,ERALPHA_A		AP-2		RP11-452K12.4
chr10:99098537	chr10:97338780	0.94	0.98	rs10786334	C	T	0.21	0.6	0.69	0.63							HNF4,Nkx2		RP11-452K12.4
chr10:99098702	chr10:97338945	0.95	0.98	rs10786335	C	T	0.22	0.61	0.69	0.63							Ets		RP11-452K12.4
chr10:99099397	chr10:97339640	0.95	0.98	rs11189138	T	C	0.22	0.61	0.69	0.63			ESC, IPSC				HNF4,Hand1,SRF		RP11-452K12.4
Query SNP: rs807037 and variants with r2 >= 0.8
pos (hg19)	pos (hg38)	LD	LD	variant	Ref	Alt	AFR	AMR	ASN	EUR	SiPhy	Promoter	Enhancer	DNAse	Proteins	eQTL	Motifs	Drivers	GENCODE	dbSNP
		(r²)	(D')				freq	freq	freq	freq	cons	histone marks	histone marks		bound	tissues	changed	disrupted	genes	func annot
chr10:102824349	chr10:101064592	1	1	rs807037	G	C	0.63	0.59	0.44	0.65		4 organs	12 organs				4 altered motifs		KAZALD1	missense
Query SNP: rs7948458 and variants with r2 >= 0.8
pos (hg19)	pos (hg38)	LD	LD	variant	Ref	Alt	AFR	AMR	ASN	EUR	SiPhy	Promoter	Enhancer	DNAse	Proteins	eQTL	Motifs	Drivers	GENCODE	dbSNP
		(r²)	(D')				freq	freq	freq	freq	cons	histone marks	histone marks		bound	tissues	changed	disrupted	genes	func annot
chr11:2164333	chr11:2143103	0.86	-0.98	rs4244809	G	A	0.08	0.13	0.54	0.23		5 organs	15 organs	22 organs	5 bound proteins				IGF2	intronic
chr11:2165576	chr11:2144346	0.83	-0.93	rs35506085	G	A	0.12	0.12	0.54	0.21		9 organs	14 organs	12 organs	CTCF,SUZ12		11 altered motifs		IGF2	intronic
chr11:2171459	chr11:2150229	0.99	-1	rs61690641	TC	T	0.09	0.14	0.51	0.22			12 organs	12 organs	CTCF,EGR1		13 altered motifs		IGF2	intronic
chr11:2171601	chr11:2150371	0.92	-0.99	rs4320932	T	C	0.13	0.14	0.51	0.2		ESDR	8 organs	45 organs	CTCF,RAD21		AIRE,CTCF,Rad21		IGF2	intronic
chr11:2172830	chr11:2151600	1	1	rs7948458	A	C	0.71	0.85	0.48	0.78		5 organs	17 organs	50 organs	6 bound proteins		4 altered motifs		IGF2	intronic
Query SNP: rs11181913 and variants with r2 >= 0.8
pos (hg19)	pos (hg38)	LD	LD	variant	Ref	Alt	AFR	AMR	ASN	EUR	SiPhy	Promoter	Enhancer	DNAse	Proteins	eQTL	Motifs	Drivers	GENCODE	dbSNP
		(r²)	(D')				freq	freq	freq	freq	cons	histone marks	histone marks		bound	tissues	changed	disrupted	genes	func annot
chr12:43574200	chr12:43180397	1	1	rs11181913	A	G	0.07	0.1	0.07	0.09			GI, BRN	ADRL,BRN,MUS	GATA2,P300		4 altered motifs		17kb 3' of RP11-118A3.1
Query SNP: rs7959830 and variants with r2 >= 0.8
pos (hg19)	pos (hg38)	LD	LD	variant	Ref	Alt	AFR	AMR	ASN	EUR	SiPhy	Promoter	Enhancer	DNAse	Proteins	eQTL	Motifs	Drivers	GENCODE	dbSNP
		(r²)	(D')				freq	freq	freq	freq	cons	histone marks	histone marks		bound	tissues	changed	disrupted	genes	func annot
chr12:66326943	chr12:65933163	0.96	0.99	rs1480474	A	G	0.46	0.62	0.91	0.44			7 organs	ESDR			PLZF		HMGA2	intronic
chr12:66346624	chr12:65952844	0.95	0.99	rs1979440	T	C	0.43	0.62	0.9	0.43		LNG	12 organs	13 organs	BATF,CFOS,STAT3		HES1,Nr2f2		HMGA2	intronic
chr12:66347368	chr12:65953588	1	1	rs7959830	G	T	0.57	0.63	0.9	0.44		LNG	12 organs	SKIN,KID			4 altered motifs		HMGA2	intronic
chr12:66353891	chr12:65960111	0.89	0.97	rs7138102	G	A	0.18	0.57	0.8	0.42			10 organs				ZID		HMGA2	intronic
chr12:66354911	chr12:65961131	0.91	0.99	rs867633	G	A	0.37	0.59	0.86	0.42		LIV	14 organs	BLD,SKIN,ADRL	4 bound proteins		HDAC2		HMGA2	intronic
Query SNP: rs9316971 and variants with r2 >= 0.8
pos (hg19)	pos (hg38)	LD	LD	variant	Ref	Alt	AFR	AMR	ASN	EUR	SiPhy	Promoter	Enhancer	DNAse	Proteins	eQTL	Motifs	Drivers	GENCODE	dbSNP
		(r²)	(D')				freq	freq	freq	freq	cons	histone marks	histone marks		bound	tissues	changed	disrupted	genes	func annot
chr13:22980191	chr13:22406052	1	1	rs9316971	T	C	0.38	0.66	0.52	0.71			5 organs	BRN,BRN,LNG			4 altered motifs		397kb 5' of SNORD36
Query SNP: rs7327381 and variants with r2 >= 0.8
pos (hg19)	pos (hg38)	LD	LD	variant	Ref	Alt	AFR	AMR	ASN	EUR	SiPhy	Promoter	Enhancer	DNAse	Proteins	eQTL	Motifs	Drivers	GENCODE	dbSNP
		(r²)	(D')				freq	freq	freq	freq	cons	histone marks	histone marks		bound	tissues	changed	disrupted	genes	func annot
chr13:52006645	chr13:51432509	1	1	rs7327381	C	T	0.71	0.51	0.63	0.37			4 organs				Foxp1,Irx,Pou2f2		INTS6	intronic
chr13:52023533	chr13:51449397	0.98	0.99	rs7997510	A	G	0.67	0.49	0.51	0.37			13 organs	BLD	POL24H8		CTCF,Egr-1,LBP-9		INTS6	intronic
Query SNP: rs75772222 and variants with r2 >= 0.8
pos (hg19)	pos (hg38)	LD	LD	variant	Ref	Alt	AFR	AMR	ASN	EUR	SiPhy	Promoter	Enhancer	DNAse	Proteins	eQTL	Motifs	Drivers	GENCODE	dbSNP
		(r²)	(D')				freq	freq	freq	freq	cons	histone marks	histone marks		bound	tissues	changed	disrupted	genes	func annot
chr14:25434980	chr14:24965774	1	1	rs80349404	T	G	0.13	0.08	0.1	0.12		FAT, MUS	11 organs	10 organs			4 altered motifs		STXBP6	intronic
chr14:25437183	chr14:24967977	0.99	1	rs7155485	G	A	0.12	0.08	0.1	0.12			BRN, GI, HRT	LIV			HNF4,RXRA		STXBP6	intronic
chr14:25439630	chr14:24970424	1	1	rs987056	G	A	0.12	0.08	0.1	0.12			BRN, HRT						STXBP6	intronic
chr14:25441067	chr14:24971861	1	1	rs17109380	T	C	0.13	0.08	0.1	0.12			BRN, GI, HRT				CEBPB,Hoxa3,SRF		STXBP6	intronic
chr14:25442259	chr14:24973053	0.98	1	rs77757127	G	A	0.13	0.08	0.14	0.12			4 organs	GI			4 altered motifs		STXBP6	intronic
chr14:25443363	chr14:24974157	1	1	rs17109382	A	T	0.13	0.08	0.1	0.12		FAT, GI	GI, HRT	BRN,HRT,LNG					STXBP6	intronic
chr14:25444195	chr14:24974989	1	1	rs58424382	T	C	0.13	0.08	0.1	0.12		HRT	4 organs	HRT			HP1-site-factor,Mef2		STXBP6	intronic
chr14:25446343	chr14:24977137	0.99	1	rs139018640	T	TC	0.12	0.08	0.1	0.12			GI, LIV				5 altered motifs		STXBP6	intronic
chr14:25447080	chr14:24977874	1	1	rs75772222	C	T	0.13	0.08	0.1	0.12			GI, PLCNT, LIV				4 altered motifs		STXBP6	intronic
chr14:25447817	chr14:24978611	1	1	rs17109397	C	A	0.13	0.08	0.1	0.12			4 organs	GI,GI					STXBP6	intronic
chr14:25450181	chr14:24980975	1	1	rs80290239	T	C	0.13	0.08	0.1	0.12			GI, LNG, LIV				AP-1,Foxo		STXBP6	intronic
chr14:25450433	chr14:24981227	1	1	rs17109406	C	T	0.13	0.08	0.1	0.12			4 organs						STXBP6	intronic
chr14:25451607	chr14:24982401	1	1	rs8019222	A	G	0.13	0.08	0.1	0.12		LNG, GI	15 organs	ESDR,LNG,VAS			ZID,p300		STXBP6	intronic
chr14:25451853	chr14:24982647	1	1	rs11851504	A	G	0.13	0.08	0.1	0.12		GI	14 organs	23 organs	GR,FOSL2,JUND		Foxj2,GR		STXBP6	intronic
chr14:25452691	chr14:24983485	1	1	rs7142073	A	G	0.13	0.08	0.1	0.12			5 organs	ESDR			Foxd3,Maf,VDR		STXBP6	intronic
chr14:25453397	chr14:24984191	1	1	rs11849185	G	A	0.12	0.08	0.1	0.12			PLCNT, GI						STXBP6	intronic
chr14:25454556	chr14:24985350	1	1	rs11847576	T	C	0.12	0.08	0.1	0.12		GI, BLD	13 organs	20 organs	KAP1		ATF3,GATA,Nr2f2		STXBP6	intronic
chr14:25462835	chr14:24993629	1	1	rs11850786	T	C	0.13	0.08	0.1	0.12			6 organs				4 altered motifs		STXBP6	intronic
chr14:25463393	chr14:24994187	1	1	rs17109457	C	G	0.13	0.08	0.1	0.12			5 organs	LIV			Mef2,SRF,YY1		STXBP6	intronic
chr14:25466465	chr14:24997259	1	1	rs17109462	C	A	0.13	0.08	0.1	0.12			4 organs	5 organs			BATF		STXBP6	intronic
chr14:25466979	chr14:24997773	1	1	rs28722832	T	C	0.54	0.13	0.1	0.12							RBP-Jkappa,TATA		STXBP6	intronic
chr14:25472083	chr14:25002877	0.93	1	rs7154613	C	T	0.14	0.09	0.1	0.13			HRT				4 altered motifs		STXBP6	intronic
chr14:25472382	chr14:25003176	0.93	1	rs7153837	G	A	0.21	0.1	0.1	0.13			4 organs	5 organs			5 altered motifs		STXBP6	intronic
chr14:25480234	chr14:25011028	0.93	1	rs6574131	C	T	0.2	0.1	0.1	0.13			11 organs	HRT			6 altered motifs		STXBP6	intronic
chr14:25480235	chr14:25011029	0.93	1	rs8004566	A	G	0.2	0.1	0.1	0.13			11 organs	HRT			CDP,Foxj2,Mef2		STXBP6	intronic
chr14:25480269	chr14:25011063	0.93	1	rs8009099	T	C	0.21	0.1	0.1	0.13			11 organs	HRT			CEBPB,Mrg1::Hoxa9		STXBP6	intronic
chr14:25480435	chr14:25011229	0.92	0.99	rs199987924	AAG	A	0.2	0.1	0.1	0.13			11 organs	5 organs			17 altered motifs		STXBP6	intronic
chr14:25481236	chr14:25012030	0.93	1	rs8008618	G	A	0.21	0.1	0.1	0.13				BLD			8 altered motifs		STXBP6	intronic
chr14:25481880	chr14:25012674	0.93	1	rs57426267	A	C	0.21	0.1	0.1	0.13				PANC			Maf,PU.1		STXBP6	intronic
chr14:25483664	chr14:25014458	0.93	1	rs57614343	C	T	0.21	0.1	0.1	0.13			6 organs				Mef2		STXBP6	intronic
chr14:25485981	chr14:25016775	0.91	0.99	rs1952499	A	G	0.13	0.09	0.1	0.13			LIV				22 altered motifs		STXBP6	intronic
chr14:25495275	chr14:25026069	0.9	0.99	rs2094659	C	T	0.13	0.09	0.1	0.13			4 organs				BATF,Pou5f1,ZBTB33		STXBP6	intronic
chr14:25496755	chr14:25027549	0.9	0.99	rs58590969	C	G	0.12	0.09	0.1	0.13							TATA,Znf143		STXBP6	intronic
chr14:25498351	chr14:25029145	0.9	0.99	rs7152812	G	T	0.12	0.09	0.1	0.13							HNF6,Pbx-1		STXBP6	intronic
chr14:25499017	chr14:25029811	0.9	0.99	rs1952491	C	T	0.13	0.09	0.1	0.13							5 altered motifs		STXBP6	intronic
chr14:25505604	chr14:25036398	0.8	0.91	rs17109515	G	A	0.13	0.09	0.08	0.13			PLCNT, HRT, LIV	LIV			Roaz		STXBP6	intronic
chr14:25507357	chr14:25038151	0.82	0.93	rs77860416	G	A	0.13	0.1	0.08	0.13			SKIN, LIV	SKIN			5 altered motifs		STXBP6	intronic
chr14:25509026	chr14:25039820	0.82	0.93	rs138532866	C	T	0.13	0.1	0.08	0.13			4 organs				4 altered motifs		STXBP6	intronic
Query SNP: rs4083463 and variants with r2 >= 0.8
pos (hg19)	pos (hg38)	LD	LD	variant	Ref	Alt	AFR	AMR	ASN	EUR	SiPhy	Promoter	Enhancer	DNAse	Proteins	eQTL	Motifs	Drivers	GENCODE	dbSNP
		(r²)	(D')				freq	freq	freq	freq	cons	histone marks	histone marks		bound	tissues	changed	disrupted	genes	func annot
chr14:81814426	chr14:81348082	0.8	0.9	rs11621378	T	A	0.14	0.34	0.25	0.27			ESC, BLD, BRN	ESDR,BLD			Pou3f2		STON2	intronic
chr14:81818492	chr14:81352148	0.8	0.9	rs8008024	A	G	0.15	0.34	0.41	0.27							4 altered motifs		STON2	intronic
chr14:81819809	chr14:81353465	0.8	0.9	rs6574646	A	G	0.23	0.36	0.41	0.27							Irf,TBX5		STON2	intronic
chr14:81820503	chr14:81354159	0.8	0.9	rs7147254	G	A	0.19	0.35	0.41	0.27			7 organs	6 organs					STON2	intronic
chr14:81820515	chr14:81354171	0.8	0.9	rs7146802	A	G	0.2	0.35	0.41	0.27			7 organs	6 organs			E2F,Nkx2		STON2	intronic
chr14:81820979	chr14:81354635	0.8	0.9	rs7153469	T	G	0.19	0.35	0.41	0.27							6 altered motifs		STON2	intronic
chr14:81821282	chr14:81354938	0.8	0.9	rs12436146	A	G	0.23	0.36	0.41	0.27							5 altered motifs		STON2	intronic
chr14:81825172	chr14:81358828	0.8	0.9	rs10450894	T	A	0.23	0.36	0.41	0.27							AP-1,Pou5f1		STON2	intronic
chr14:81825202	chr14:81358858	0.8	0.9	rs10450939	A	T	0.23	0.36	0.41	0.27							Mef2,Pou2f2,Zfp187		STON2	intronic
chr14:81825326	chr14:81358982	0.8	0.9	rs10450940	C	A	0.23	0.36	0.41	0.27							6 altered motifs		STON2	intronic
chr14:81834523	chr14:81368179	0.88	0.98	rs72703728	G	A	0.17	0.35	0.27	0.26			GI	SKIN			HNF1,Zfp105		STON2	intronic
chr14:81836866	chr14:81370522	0.93	0.97	rs12435764	T	G	0.18	0.38	0.29	0.28			MUS				BAF155,SIX5,Znf143		STON2	intronic
chr14:81838921	chr14:81372577	0.87	0.94	rs200684805	G	GAAC	0.2	0.39	0.29	0.28			SKIN				4 altered motifs		STON2	intronic
chr14:81840659	chr14:81374315	0.92	0.97	rs61986593	G	A	0.13	0.36	0.29	0.27							9 altered motifs		STON2	intronic
chr14:81841577	chr14:81375233	0.92	0.97	rs57670850	C	T	0.13	0.36	0.29	0.27							7 altered motifs		STON2	intronic
chr14:81841579	chr14:81375235	0.95	0.98	rs59969857	A	G	0.18	0.38	0.29	0.28							5 altered motifs		STON2	intronic
chr14:81850850	chr14:81384506	0.82	0.97	rs35317163	GA	G	0.09	0.32	0.29	0.25			5 organs				Crx,Pitx2,Zfp161		STON2	intronic
chr14:81853107	chr14:81386763	0.93	0.97	rs61986597	T	C	0.13	0.36	0.29	0.27		ESC, IPSC	7 organs	4 organs					STON2	intronic
chr14:81856323	chr14:81389979	1	1	rs4083463	G	A	0.23	0.38	0.3	0.27			BRN				4 altered motifs		STON2	intronic
chr14:81856865	chr14:81390521	0.96	0.99	rs61986598	G	A	0.16	0.38	0.3	0.28			ESDR, GI				Zbtb3		STON2	intronic
chr14:81859521	chr14:81393177	0.96	0.99	rs8020575	G	A	0.2	0.38	0.3	0.28		SKIN, BRST	4 organs	5 organs			5 altered motifs		STON2	intronic
chr14:81860917	chr14:81394573	0.93	0.97	rs61986599	G	A	0.14	0.36	0.3	0.27			BRST, SKIN	MUS			HNF4,VDR		STON2	intronic
Query SNP: rs9806595 and variants with r2 >= 0.8
pos (hg19)	pos (hg38)	LD	LD	variant	Ref	Alt	AFR	AMR	ASN	EUR	SiPhy	Promoter	Enhancer	DNAse	Proteins	eQTL	Motifs	Drivers	GENCODE	dbSNP
		(r²)	(D')				freq	freq	freq	freq	cons	histone marks	histone marks		bound	tissues	changed	disrupted	genes	func annot
chr15:48692460	chr15:48400263	0.81	-0.94	rs7171330	T	A	0.4	0.74	0.55	0.75			7 organs	11 organs			CEBPB,Foxd3,Sox		8kb 3' of FBN1
chr15:48697676	chr15:48405479	0.83	-0.96	rs28481454	G	A	0.42	0.75	0.55	0.74			6 organs				4 altered motifs		2.8kb 3' of FBN1
chr15:48697752	chr15:48405555	0.81	-0.96	rs71432258	C	CCCCA	0.42	0.75	0.55	0.74			6 organs				12 altered motifs		2.8kb 3' of FBN1
chr15:48698503	chr15:48406306	0.88	-0.95	rs2013984	T	C	0.62	0.82	0.91	0.76		LIV	10 organs	ADRL,BRN			CTCF,Rad21,SMC3		2kb 3' of FBN1
chr15:48701029	chr15:48408832	0.9	-0.95	rs11070641	C	T	0.62	0.81	0.88	0.76		FAT	8 organs	5 organs			4 altered motifs		FBN1	3'-UTR
chr15:48701612	chr15:48409415	0.91	-0.96	rs4775760	A	C	0.43	0.76	0.63	0.76			5 organs				14 altered motifs		FBN1	3'-UTR
chr15:48705206	chr15:48413009	0.86	-0.96	rs16960901	T	C	0.4	0.74	0.55	0.75		FAT, MUS, LNG	11 organs	BRN			Pou2f2,SRF,THAP1		FBN1	intronic
chr15:48706571	chr15:48414374	0.86	-0.96	rs12916536	A	G	0.4	0.74	0.55	0.75			7 organs	6 organs					FBN1	intronic
chr15:48714838	chr15:48422641	0.86	-0.96	rs1467953	T	G	0.35	0.73	0.55	0.75			FAT, GI	4 organs			6 altered motifs		FBN1	intronic
chr15:48715448	chr15:48423251	0.86	-0.96	rs9920570	A	G	0.35	0.73	0.55	0.75			7 organs				HEN1,TAL1		FBN1	intronic
chr15:48720271	chr15:48428074	0.95	-0.98	rs3929051	C	T	0.66	0.82	0.88	0.76			12 organs	21 organs			7 altered motifs		FBN1	intronic
chr15:48720526	chr15:48428329	0.96	-0.99	rs363832	G	C	0.46	0.76	0.63	0.76			13 organs	9 organs			Hic1		FBN1	intronic
chr15:48728634	chr15:48436437	0.9	-0.99	rs2042747	C	T	0.41	0.76	0.55	0.75			FAT, STRM, SKIN				HNF4,RXRA		FBN1	intronic
chr15:48733625	chr15:48441428	0.91	-0.99	rs1426718	C	T	0.36	0.77	0.58	0.75			6 organs	BLD					FBN1	intronic
chr15:48736684	chr15:48444487	0.9	-0.99	rs2303502	A	T	0.41	0.77	0.58	0.75			SKIN, MUS, LNG	SKIN,OVRY,SKIN			HNF4		FBN1	intronic
chr15:48739274	chr15:48447077	0.91	-0.99	rs2303500	A	G	0.43	0.77	0.58	0.75			6 organs				Pou3f2,Pou3f4,Sox		FBN1	intronic
chr15:48740097	chr15:48447900	0.91	-0.99	rs8029993	C	T	0.36	0.77	0.58	0.75			10 organs	14 organs	5 bound proteins		Mef2,RFX5		FBN1	intronic
chr15:48744005	chr15:48451808	0.96	-0.99	rs4775762	T	C	0.63	0.85	0.91	0.77		VAS	7 organs	HRT,VAS			Sox		FBN1	intronic
chr15:48744489	chr15:48452292	0.91	-0.99	rs2245752	C	A	0.41	0.77	0.58	0.75			7 organs	VAS,LNG			NRSF		FBN1	intronic
chr15:48745322	chr15:48453125	0.9	-0.99	rs2725550	G	A	0.36	0.77	0.58	0.75			GI				Hic1		FBN1	intronic
chr15:48745489	chr15:48453292	0.87	-0.99	rs199764228	AAC	A	0.56	0.78	0.6	0.74			GI				18 altered motifs		FBN1	intronic
chr15:48747440	chr15:48455243	0.91	-0.99	rs2555470	C	T	0.36	0.78	0.58	0.75			ESDR, FAT, MUS				SREBP		FBN1	intronic
chr15:48750520	chr15:48458323	0.89	-0.98	rs1812873	C	A	0.41	0.78	0.58	0.75			FAT, SKIN				Mef2,TATA		FBN1	intronic
chr15:48751329	chr15:48459132	0.99	-0.99	rs714290	C	G	0.45	0.79	0.66	0.76			14 organs	4 organs	CTCF		4 altered motifs		FBN1	intronic
chr15:48753145	chr15:48460948	0.92	-1	rs2466792	C	A	0.35	0.77	0.58	0.75			7 organs				Pou3f2,p300		FBN1	intronic
chr15:48753624	chr15:48461427	0.92	-1	rs2433394	C	A	0.35	0.77	0.58	0.75			4 organs				4 altered motifs		FBN1	intronic
chr15:48754122	chr15:48461925	0.92	-1	rs2620361	G	T	0.36	0.77	0.58	0.75			FAT, STRM, SKIN				GATA,HDAC2		FBN1	intronic
chr15:48755168	chr15:48462971	1	1	rs9806595	T	C	0.59	0.21	0.34	0.24			FAT, SKIN	ESDR,LNG,SKIN			COMP1,GATA		FBN1	intronic
chr15:48757195	chr15:48464998	0.92	1	rs10519177	A	G	0.65	0.23	0.42	0.25							4 altered motifs		FBN1	intronic
chr15:48757460	chr15:48465263	0.92	1	rs7171359	T	C	0.65	0.23	0.42	0.25							CEBPG,Sp100		FBN1	intronic
chr15:48759291	chr15:48467094	0.92	0.99	rs4774517	G	T	0.61	0.23	0.42	0.25			FAT, GI				4 altered motifs		FBN1	intronic
chr15:48764391	chr15:48472194	0.91	0.99	rs61364280	C	G	0.56	0.23	0.42	0.25			5 organs	ESDR			7 altered motifs		FBN1	intronic
chr15:48766250	chr15:48474053	0.91	0.99	rs56686382	G	C	0.52	0.22	0.38	0.25			4 organs						FBN1	intronic
chr15:48769044	chr15:48476847	0.9	0.99	rs35026266	C	T	0.36	0.21	0.37	0.25			FAT, SKIN				GCNF,NRSF		FBN1	intronic
chr15:48770580	chr15:48478383	0.9	0.99	rs2413906	A	G	0.52	0.22	0.38	0.25			8 organs	SKIN			CEBPG		FBN1	intronic
chr15:48774288	chr15:48482091	0.9	0.99	rs11634866	A	G	0.52	0.22	0.38	0.25			5 organs	LNG,SKIN,SKIN			GR,ZBTB33		FBN1	intronic
chr15:48784497	chr15:48492300	0.88	0.98	rs11070644	T	C	0.74	0.23	0.38	0.25			6 organs				HP1-site-factor,Mrg1::Hoxa9		FBN1	intronic
chr15:48789634	chr15:48497437	0.87	0.97	rs140605	T	C	0.63	0.22	0.38	0.25			FAT, SKIN, BONE				16 altered motifs		FBN1	intronic
chr15:48792444	chr15:48500247	0.86	0.96	rs9652450	A	G	0.74	0.23	0.38	0.25			LNG, FAT, STRM		MAFF,MAFK		Mrg1::Hoxa9,Pax-4		FBN1	intronic
chr15:48799348	chr15:48507151	0.87	0.97	rs7164277	T	C	0.73	0.23	0.38	0.25			7 organs	SKIN					FBN1	intronic
chr15:48803839	chr15:48511642	0.86	0.96	rs9806163	T	C	0.73	0.23	0.38	0.25			4 organs				Gm397		FBN1	intronic
chr15:48803919	chr15:48511722	0.86	0.96	rs16961062	T	G	0.63	0.22	0.38	0.25			4 organs				AIRE,Foxo,ZBTB33		FBN1	intronic
chr15:48805637	chr15:48513440	0.86	0.96	rs2306352	G	A	0.73	0.23	0.38	0.25			ESDR	ESC					FBN1	intronic
chr15:48810499	chr15:48518302	0.84	0.95	rs7184016	G	T	0.54	0.22	0.38	0.25				PLCNT			6 altered motifs		FBN1	intronic
chr15:48812020	chr15:48519823	0.84	0.96	rs755251	A	G	0.63	0.22	0.38	0.25									FBN1	intronic
chr15:48817429	chr15:48525232	0.84	0.96	rs4410024	A	G	0.61	0.22	0.38	0.25							AhR::Arnt,Arnt,p300		FBN1	intronic
chr15:48820068	chr15:48527871	0.83	0.96	rs8036173	T	C	0.74	0.23	0.38	0.25			LNG						FBN1	intronic
chr15:48827144	chr15:48534947	0.81	0.95	rs7164585	T	C	0.81	0.23	0.38	0.26			9 organs	MUS			Tel2		FBN1	intronic
Query SNP: rs4887113 and variants with r2 >= 0.8
pos (hg19)	pos (hg38)	LD	LD	variant	Ref	Alt	AFR	AMR	ASN	EUR	SiPhy	Promoter	Enhancer	DNAse	Proteins	eQTL	Motifs	Drivers	GENCODE	dbSNP
		(r²)	(D')				freq	freq	freq	freq	cons	histone marks	histone marks		bound	tissues	changed	disrupted	genes	func annot
chr15:79075746	chr15:78783404	0.85	0.94	rs12050525	T	C	0.13	0.32	0.08	0.41							4 altered motifs		ADAMTS7	intronic
chr15:79076704	chr15:78784362	0.86	0.95	rs2904220	G	T	0.13	0.33	0.08	0.41							EWSR1-FLI1,HDAC2,p300		ADAMTS7	intronic
chr15:79077114	chr15:78784772	0.87	0.95	rs1825087	A	G	0.13	0.33	0.08	0.42							Arid5a,Irf		ADAMTS7	intronic
chr15:79077878	chr15:78785536	0.85	0.96	rs11072803	G	A	0.13	0.33	0.08	0.41			BLD				NRSF,PRDM1		ADAMTS7	intronic
chr15:79078358	chr15:78786016	0.85	0.95	rs11858210	G	A	0.13	0.33	0.08	0.41			BLD				10 altered motifs		ADAMTS7	intronic
chr15:79078486	chr15:78786144	0.84	0.95	rs11072804	T	G	0.13	0.33	0.08	0.41			BLD				BDP1,GATA,p53		ADAMTS7	intronic
chr15:79078518	chr15:78786176	0.84	0.95	rs11072805	T	C	0.13	0.33	0.08	0.41			BLD				9 altered motifs		ADAMTS7	intronic
chr15:79079074	chr15:78786732	0.89	0.96	rs11072806	G	A	0.13	0.34	0.08	0.42			BLD				6 altered motifs		ADAMTS7	intronic
chr15:79079512	chr15:78787170	0.9	0.96	rs12899147	A	G	0.13	0.34	0.08	0.42			BLD				4 altered motifs		ADAMTS7	intronic
chr15:79080234	chr15:78787892	0.82	0.96	rs1994016	C	T	0.11	0.33	0.08	0.4		BLD	ADRL, SPLN				AP-1		ADAMTS7	intronic
chr15:79082547	chr15:78790205	0.92	0.97	rs4886592	T	C	0.11	0.33	0.09	0.42			BLD, HRT, THYM	4 organs	CTCF		Bach1,Bach2		ADAMTS7	intronic
chr15:79083376	chr15:78791034	0.95	0.98	rs2277546	C	A	0.11	0.33	0.08	0.42			BLD, HRT				Pbx3,Zfx		ADAMTS7	intronic
chr15:79083591	chr15:78791249	0.95	0.98	rs2277545	T	C	0.1	0.33	0.08	0.42			SKIN, HRT				ERalpha-a,Esr2		ADAMTS7	intronic
chr15:79083814	chr15:78791472	0.95	0.98	rs11639044	C	T	0.05	0.32	0.02	0.42			SKIN, HRT						ADAMTS7	intronic
chr15:79084933	chr15:78792591	0.95	0.98	rs12903203	T	C	0.1	0.33	0.08	0.42							10 altered motifs		ADAMTS7	intronic
chr15:79085915	chr15:78793573	0.96	0.99	rs11631955	A	G	0.05	0.32	0.02	0.42									ADAMTS7	intronic
chr15:79086057	chr15:78793715	0.96	0.99	rs11632102	G	A	0.05	0.32	0.02	0.42									ADAMTS7	intronic
chr15:79089111	chr15:78796769	0.98	0.99	rs3825807	A	G	0.13	0.34	0.13	0.42			IPSC, SKIN, HRT				Rad21		ADAMTS7	missense
chr15:79089734	chr15:78797392	0.98	0.99	rs7177699	T	C	0.12	0.34	0.13	0.42			6 organs				4 altered motifs		ADAMTS7	intronic
chr15:79090606	chr15:78798264	0.99	1	rs28610385	C	A	0.11	0.34	0.13	0.42		4 organs	12 organs	MUS,MUS,MUS	GR		5 altered motifs		ADAMTS7	intronic
chr15:79092182	chr15:78799840	0.97	1	rs202148592	T	TC	0.1	0.34	0.13	0.42							6 altered motifs		ADAMTS7	intronic
chr15:79092183	chr15:78799841	0.99	1	rs11638321	T	C	0.12	0.34	0.13	0.42							6 altered motifs		ADAMTS7	intronic
chr15:79092750	chr15:78800408	1	1	rs7173267	G	C	0.12	0.34	0.13	0.42			ESDR				E2F,Egr-1,RXRA		ADAMTS7	synonymous
chr15:79093201	chr15:78800859	1	1	rs11634450	A	G	0.12	0.34	0.13	0.42				IPSC			BCL,Pax-6		ADAMTS7	intronic
chr15:79094325	chr15:78801983	1	1	rs11856536	A	G	0.11	0.34	0.13	0.42							CAC-binding-protein		ADAMTS7	intronic
chr15:79095287	chr15:78802945	1	1	rs4887113	C	T	0.05	0.33	0.02	0.42			ESC						ADAMTS7	intronic
chr15:79099145	chr15:78806803	0.99	0.99	rs12592721	G	C	0.11	0.34	0.13	0.42			ESC, IPSC, FAT				AP-2,Irf		ADAMTS7	intronic
chr15:79105350	chr15:78813008	0.92	0.97	rs11634042	C	T	0.16	0.35	0.13	0.42			5 organs				6 altered motifs		MORF4L1
Query SNP: rs184926585 and variants with r2 >= 0.8
pos (hg19)	pos (hg38)	LD	LD	variant	Ref	Alt	AFR	AMR	ASN	EUR	SiPhy	Promoter	Enhancer	DNAse	Proteins	eQTL	Motifs	Drivers	GENCODE	dbSNP
		(r²)	(D')				freq	freq	freq	freq	cons	histone marks	histone marks		bound	tissues	changed	disrupted	genes	func annot
chr18:32622168	chr18:35042204	0.92	0.98	rs523232	G	C	0.17	0.02	0.1	0.09		24 organs	BLD, GI	27 organs			6 altered motifs		MAPRE2	intronic
chr18:32626646	chr18:35046682	0.92	0.98	rs624789	A	G	0.18	0.02	0.1	0.09		BLD, LNG	14 organs	4 organs			Ik-2		MAPRE2	intronic
chr18:32628519	chr18:35048555	0.92	0.98	rs487619	A	G	0.13	0.02	0.11	0.09			BLD, BRN						MAPRE2	intronic
chr18:32628645	chr18:35048681	0.92	0.98	rs118184589	G	A	0	0.01	0.1	0.09			BLD, BRN				Foxl1		MAPRE2	intronic
chr18:32643292	chr18:35063328	1	1	rs184926585	T	C	0.01	0.01	0.09	0.08			LIV						MAPRE2	intronic
chr18:32643307	chr18:35063343	0.98	1	rs149263610	G	A	0.01	0.01	0.08	0.08			LIV				5 altered motifs		MAPRE2	intronic
chr18:32646432	chr18:35066468	0.93	1	rs72954319	C	T	0.01	0.01	0.1	0.09			BLD, BRN, HRT				4 altered motifs		MAPRE2	intronic
chr18:32653529	chr18:35073565	0.93	1	rs17559261	T	G	0.01	0.01	0.08	0.09		VAS	12 organs	VAS			11 altered motifs		MAPRE2	intronic
chr18:32656988	chr18:35077024	0.93	1	rs514400	C	T	0.15	0.02	0.08	0.09			14 organs	SKIN,VAS	GATA2		Dmbx1,Ik-2		MAPRE2	intronic
chr18:32670541	chr18:35090577	0.93	1	rs619799	C	T	0.15	0.02	0.08	0.09			ESDR, HRT				4 altered motifs		MAPRE2	intronic
chr18:32671831	chr18:35091867	0.93	1	rs635378	G	T	0.15	0.02	0.08	0.09			5 organs				4 altered motifs		MAPRE2	intronic
chr18:32672902	chr18:35092938	0.93	1	rs529533	G	A	0.15	0.02	0.08	0.09			HRT, OVRY						MAPRE2	intronic
chr18:32673611	chr18:35093647	0.93	1	rs502129	C	T	0.15	0.02	0.08	0.09			5 organs	SKIN			CEBPB,GR		MAPRE2	intronic
chr18:32680870	chr18:35100906	0.89	0.98	rs474277	G	A	0.15	0.02	0.08	0.09			SKIN				Pax-4,p53		MAPRE2	intronic
chr18:32716493	chr18:35136529	0.82	0.93	rs617549	C	T	0.15	0.02	0.08	0.09			6 organs	5 organs	11 bound proteins		Sin3Ak-20		MAPRE2	intronic
chr18:32718146	chr18:35138182	0.82	0.93	rs556594	C	T	0.14	0.02	0.08	0.09			7 organs	ADRL,BLD			BDP1,EBF,Rad21		MAPRE2	intronic
Query SNP: rs6064518 and variants with r2 >= 0.8
pos (hg19)	pos (hg38)	LD	LD	variant	Ref	Alt	AFR	AMR	ASN	EUR	SiPhy	Promoter	Enhancer	DNAse	Proteins	eQTL	Motifs	Drivers	GENCODE	dbSNP
		(r²)	(D')				freq	freq	freq	freq	cons	histone marks	histone marks		bound	tissues	changed	disrupted	genes	func annot
chr20:55816000	chr20:57240944	0.99	1	rs62205690	G	C	0.13	0.28	0.06	0.35			4 organs				BDP1,NRSF		BMP7	intronic
chr20:55821046	chr20:57245990	1	1	rs6064518	G	T	0.14	0.28	0.06	0.36							Foxq1,ZEB1		BMP7	intronic
Query SNP: rs13050142 and variants with r2 >= 0.8
pos (hg19)	pos (hg38)	LD	LD	variant	Ref	Alt	AFR	AMR	ASN	EUR	SiPhy	Promoter	Enhancer	DNAse	Proteins	eQTL	Motifs	Drivers	GENCODE	dbSNP
		(r²)	(D')				freq	freq	freq	freq	cons	histone marks	histone marks		bound	tissues	changed	disrupted	genes	func annot
chr21:47427165	chr21:46007251	1	1	rs13050142	C	T	0.16	0.2	0.08	0.34			SKIN	PLCNT			Rad21,SRF		2.2kb 3' of COL6A1
