# Supplementary material for: Genome-wide association meta-analysis of corneal curvature identifies novel loci and shared genetic influences across axial length and refractive error
Source: Commun Biol. 2020 Mar 19;3:133. doi: 10.1038/s42003-020-0802-y (PMC7081241; doi:10.1038/s42003-020-0802-y)
Supplement: Supplementary file 5 — Supplementary Data 3 [file 42003_2020_802_MOESM5_ESM.xlsx]

## Sheet: sheet1
Association of corneal curvature SNPs with axial length and spherical equivalent
					corneal curvature, mm			Axial Length, mm				Spherical Equivalent, diopter
SNP	CHR	POS	GENE	A1/A2	β	s.e	P	β	s.e	P	FDR <0.01	β	s.e	P	FDR <0.01	Pleiotropic effect ratio
Group A: Associated with AL only
rs4074961	1	38092723	RSPO1	T/C	0.022	0.0018	1.06e-29	0.0821	0.0112	2.719e-13	Yes	0.0285012	0.0117562	0.013	No	3.73182
rs2630445	3	13554886	HDAC11/FBLN2	T/G	0.0302	0.0036	1.17e-15	0.09	0.0225	6.305e-05	Yes	0.0130606	0.0192528	0.62	No	2.98013
rs1800813	4	55094467	PDGFRA	A/G	-0.0226	0.0022	6.44e-23	-0.0543	0.0134	5.241e-05	Yes	-0.0207943	0.0140504	0.16	No	2.40265
rs7708378	5	129088784	ADAMTS19/CHSY3	T/G	0.028	0.0044	2.49e-09	0.0802	0.0252	0.001486	Yes	-0.0172477	0.0221345	0.52	No	2.86429
rs4620141	6	138869568	NHSL1	T/C	-0.0136	0.0019	1.12e-11	-0.0374	0.0117	0.001324	Yes	0.00149274	0.0121621	0.96	No	2.75
rs11204213	10	48388228	RBP3	T/C	0.0706	0.0097	9.83e-13	0.267	0.0742	0.0003214	Yes	-0.0377	0.093	0.6848	No	3.78187
rs7959830	12	66347368	HMGA2	T/G	-0.018	0.0021	3.02e-16	-0.047	0.0138	0.0006539	Yes	0.00507886	0.0129869	0.67	No	2.61111
rs7327381	13	52006645	INTS6	T/C	0.014	0.0018	8.06e-13	0.0348	0.0115	0.002582	Yes	0.00563218	0.0118473	0.66	No	2.48571
Group B: Associated with SE
rs2245601	2	233390937	CHRND/RPSS56	A/G	-0.0138	0.0019	1.1e-11	0.0002	0.0117	0.9857	No	-0.0789182	0.0116154	1.1e-12	Yes	-0.0144928
rs10663094	3	181363464	SOX2	ACT/A	0.0119	0.002	9.82e-09	0.0156	0.0126	0.2145	No	0.0355108	0.012259	0.0038	Yes	1.311
rs11740254	5	64319640	CWC27/ADAMTS6	T/C	0.0127	0.0021	1.55e-08	-0.0002	0.0116	0.9837	No	0.0429756	0.0116898	0.00018	Yes	-0.015748
rs13180294	5	79360175	THBS4	A/G	-0.0267	0.0038	3.37e-11	-0.0074	0.0222	0.739	No	-0.0730563	0.0197633	0.00023	Yes	0.277154
rs67612840	6	10028826	OFCC1	A/T	-0.0131	0.002	8.26e-10	-0.0361	0.0123	0.003374	No	-0.0413355	0.0131204	0.00067	Yes	2.75573
	6	22064639	CASC15	T/C	0.0134	0.002	4.42e-10	0.0338	0.0119	0.004428	No	0.0910439	0.0117324	2.6e-16	Yes	2.52239
rs166976	10	90024599	RNLS	A/G	-0.0157	0.0021	2.47e-12	-0.013	0.013	0.3175	No	-0.0659768	0.0130097	9.6e-08	Yes	0.828025
rs807037	10	102824349	KAZALD1	C/G	-0.0153	0.002	1.43e-13	0.0062	0.0122	0.6131	No	-0.0726677	0.0122804	4.8e-10	Yes	-0.405229
rs11181913	12	43574200	AMAMTS20	A/G	0.0192	0.0033	3.3e-08	0.026	0.0205	0.2063	No	0.0573735	0.0201485	0.0019	Yes	1.35417
rs9806595	15	48755168	FBN1	T/C	-0.012	0.002	2.23e-08	-0.0153	0.0128	0.2307	No	-0.0837715	0.0137882	1.4e-08	Yes	1.275
rs4887113	15	79095287	ADAMTS7	T/C	0.0162	0.0023	2.57e-11	0.02	0.0136	0.1418	No	0.0398172	0.0117159	0.00024	Yes	1.23457
rs1548942	2	217619036	IGFBP5/TNP1	T/C	0.016	0.0024	4.23e-10	0.0527	0.0156	0.0007309	Yes	0.0489233	0.0163342	0.004	Yes	3.29375
rs12702376	7	47775053	HUS1	C/G	-0.0277	0.0029	3.52e-19	-0.0698	0.0178	9.109e-05	Yes	-0.0736987	0.0165175	4.4e-05	Yes	2.51986
rs7004112	8	78941331	RP11-91P17.1	T/G	-0.0128	0.0018	4.2e-11	-0.0401	0.0113	0.0004025	Yes	0.045354	0.0120412	7.4e-05	Yes	3.13281
rs9506725	13	22314146	FGF9	T/C	0.019	0.0024	3.07e-14	0.0476	0.0146	0.001109	Yes	0.0479064	0.0120163	3.4e-05	Yes	2.50526
Group C: Associated with neither
rs3737611	1	11186897	MTOR	A/G	-0.0405	0.0038	2.5e-23	-0.0168	0.0209	0.4221	No	-0.101841	0.0402581	0.013	No	0.414815
rs60078183	1	47857307	CMPK1/STIL	A/G	-0.037	0.0046	9.74e-16	-0.0674	0.0264	0.0106	No	-0.0177	0.044	0.6875	No	1.82162
rs945170	1	62867483	USP1	T/G	-0.0138	0.0019	1.61e-11	-0.0095	0.0123	0.4437	No	0.0172167	0.0132996	0.17	No	0.688406
rs485554	3	172137343	FNDC3B/GHSR	C/G	-0.0124	0.0019	1.01e-09	-0.018	0.012	0.1318	No	-0.0234641	0.0125067	0.074	No	1.45161
rs16896276	4	18015156	LCORL	A/T	0.0141	0.0021	1.74e-10	0.0246	0.013	0.0582	No	-0.0362744	0.0132408	0.0044	No	1.74468
rs7657200	4	73473151	ADAMTS3	A/G	0.0129	0.002	6.5e-10	0.018	0.0119	0.1299	No	0.00672508	0.0118989	0.49	No	1.39535
rs6831679	4	128113424	RP11-125O18.1	A/G	0.0131	0.0019	9.78e-11	0.0129	0.012	0.2817	No	0.00365026	0.0129078	0.46	No	0.984733
rs961755	6	113443139	U6	T/G	0.0125	0.0021	2.49e-08	0.0187	0.0132	0.1565	No	0.0167922	0.0149014	0.31	No	1.496
rs4837104	9	129433929	LMX1B	A/G	0.0219	0.0034	7.35e-10	-0.022	0.0221	0.3191	No	0.0279938	0.0307037	0.21	No	-1.00457
rs3132309	9	137433436	COL5A1	A/C	-0.0137	0.002	2.27e-10	-0.0182	0.0122	0.1332	No	-0.0288906	0.0120281	0.011	No	1.32847
rs10786330	10	99074959	FRAT1/FRAT2/ARHGAP19	A/C	0.012	0.0019	1.22e-09	0.0168	0.0115	0.1437	No	-0.00731505	0.0118139	0.35	No	1.4
rs7948458	11	2172830	IGF2	A/C	-0.014	0.0021	4.9e-10	-0.0208	0.0128	0.1029	No	-0.00548777	0.0147386	0.76	No	1.48571
rs9316971	13	22980191	SNORD36	T/C	-0.0129	0.0021	3.21e-09	-0.0218	0.013	0.09322	No	-0.00583131	0.0129217	0.61	No	1.68992
rs75772222	14	25447080	STXBP6	T/C	0.0213	0.003	1.28e-11	0.0347	0.0188	0.06547	No	0.029126	0.0182933	0.079	No	1.62911
rs4083463	14	81856323	STON2	A/G	0.0118	0.0019	7.92e-09	0.0001	0.012	0.9942	No	0.00123213	0.0123597	0.72	No	0.00847458
rs184926585	18	32643292	MAPRE2	T/C	-0.0201	0.0034	3.61e-08	-0.0315	0.0218	0.1477	No	-0.00749994	0.0218669	0.77	No	1.56716
rs6064518	20	55821046	BMP7	T/G	0.017	0.0022	3.47e-13	0.0325	0.0137	0.01776	No	0.0183131	0.0125173	0.13	No	1.91176
rs13050142	21	47427165	COL6A1	T/C	-0.0166	0.0023	1.86e-11	-0.0262	0.0142	0.06568	No	-0.0143904	0.0125838	0.25	No	1.57831
