# Supplementary material for: Genome-wide association meta-analysis of corneal curvature identifies novel loci and shared genetic influences across axial length and refractive error
Source: Commun Biol. 2020 Mar 19;3:133. doi: 10.1038/s42003-020-0802-y (PMC7081241; doi:10.1038/s42003-020-0802-y)
Supplement: Supplementary file 6 — Supplementary Data 4 [file 42003_2020_802_MOESM6_ESM.xlsx]

## Sheet: Sheet1
Significant pathways enriched using VEGAS
	All	CREAM-Eur		CREAM-Asn
Pathway	empiricalP_combined	empiricalP	Genes	empiricalP	Genes
490653_GO:0005578_proteinaceous_extracellular_matrix	1.05e-09	1e-06	VWA1_MFAP2_WNT4_MATN1_COL16A1_COL8A2_COL9A2_PODN_COL24A1_TGFBR3_COL11A1_WNT2B_ADAMTSL4_RPTN_BCAN_ADAMTS4_OLFML2B_DPT_MYOC_TNR_LAMC2_HMCN1_LAD1_OPTC_LAMB3_USH2A_WNT3A_NID1_ZP4_PXDN_MATN3_EMILIN1_LTBP1_VIT_EFEMP1_IL1RL1_FBLN7_ITGA6_COL5A2_FN1_IHH_COL4A3_COL6A3_GPC1_TIMP4_WNT7A_COLQ_CRTAP_DAG1_WNT5A_ADAMTS9_COL8A1_IMPG2_CCDC80_COL6A6_MUC4_DLG1_SPON2_CPZ_SLIT2_ENAM_ADAMTS3_ALB_FRAS1_MEPE_SNCA_NPNT_ND…	4.2e-05	MMP23B_MFAP2_WNT4_MATN1_COL16A1_COL8A2_COL9A2_PODN_COL24A1_TGFBR3_COL11A1_WNT2B_ADAMTSL4_RPTN_BCAN_ADAMTS4_OLFML2B_DPT_MYOC_TNR_LAMC2_HMCN1_LAD1_OPTC_LAMB3_USH2A_WNT3A_NID1_ZP4_PXDN_MATN3_EMILIN1_LTBP1_VIT_EFEMP1_IL1RL1_FBLN7_ITGA6_COL5A2_FN1_IHH_COL4A3_COL6A3_GPC1_TIMP4_WNT7A_COLQ_CRTAP_DAG1_WNT5A_ADAMTS9_COL8A1_IMPG2_CCDC80_COL6A6_MUC4_DLG1_SPON2_CPZ_SLIT2_ENAM_ADAMTS3_ALB_FRAS1_MEPE_SNCA_NPNT_…
500302_GO:0031012_extracellular_matrix	7.53e-09	1e-06	VWA1_MFAP2_WNT4_MATN1_COL16A1_COL8A2_COL9A2_PODN_COL24A1_TGFBR3_F3_COL11A1_WNT2B_ADAMTSL4_RPTN_BCAN_APCS_ADAMTS4_OLFML2B_DPT_DNM3_TNR_LAMC2_HMCN1_LAD1_OPTC_LAMB3_USH2A_TGFB2_LEFTY2_WNT3A_NID1_ZP4_PXDN_MATN3_EMILIN1_LTBP1_VIT_EFEMP1_IL1RL1_FBLN7_ITGA6_COL5A2_FN1_IHH_SERPINE2_COL4A3_COL6A3_GPC1_LMCD1_TIMP4_WNT7A_COLQ_CRTAP_CLEC3B_DAG1_WNT5A_ADAMTS9_COL8A1_IMPG2_CCDC80_COL6A6_PLSCR1_AHSG_MUC4_DLG1_S…	0.00033	MMP23B_MFAP2_WNT4_MATN1_COL16A1_COL8A2_COL9A2_PODN_COL24A1_TGFBR3_F3_COL11A1_WNT2B_ADAMTSL4_RPTN_BCAN_APCS_ADAMTS4_OLFML2B_DPT_DNM3_TNR_LAMC2_HMCN1_LAD1_OPTC_LAMB3_USH2A_TGFB2_LEFTY2_WNT3A_NID1_ZP4_PXDN_MATN3_EMILIN1_LTBP1_VIT_EFEMP1_IL1RL1_FBLN7_ITGA6_COL5A2_FN1_IHH_SERPINE2_COL4A3_COL6A3_GPC1_LMCD1_TIMP4_WNT7A_COLQ_CRTAP_CLEC3B_DAG1_WNT5A_ADAMTS9_COL8A1_IMPG2_CCDC80_COL6A6_PLSCR1_AHSG_MUC4_DLG1…
1270244_R-HSA-1474244_Extracellular_matrix_organization	9.06e-09	5e-05	AGRN_PLOD1_MFAP2_HSPG2_SDC3_COL16A1_COL8A2_COL9A2_COL24A1_VCAM1_COL11A1_ITGA10_CTSK_ADAM15_BCAN_NCSTN_ADAMTS4_DDR2_TNR_LAMC2_COLGALT2_FMOD_LAMB3_TGFB2_NID1_ADAM17_SDC1_LTBP1_NRXN1_EFEMP1_BMP10_LOXL3_LOC100505984_ITGA6_ITGA4_ITGAV_COL5A2_FN1_COL4A3_COL6A3_FBLN2_CRTAP_ITGA9_DAG1_ADAMTS9_COL8A1_CD47_ITGB5_COL6A6_PCOLCE2_PLOD2_KDR_ADAMTS3_SPP1_COL25A1_FGF2_FGG_TLL1_CASP3_KLKB1_ADAMTS16_ITGA2_HAPLN1_L…	8e-06	AGRN_PLOD1_MFAP2_HSPG2_SDC3_COL16A1_COL8A2_COL9A2_COL24A1_VCAM1_COL11A1_ITGA10_CTSK_ADAM15_BCAN_NCSTN_ADAMTS4_DDR2_TNR_LAMC2_COLGALT2_FMOD_LAMB3_TGFB2_NID1_ADAM17_SDC1_LTBP1_NRXN1_EFEMP1_BMP10_LOXL3_LOC100505984_ITGA6_ITGA4_ITGAV_COL5A2_FN1_COL4A3_COL6A3_FBLN2_CRTAP_ITGA9_DAG1_ADAMTS9_COL8A1_CD47_ITGB5_COL6A6_PCOLCE2_PLOD2_KDR_ADAMTS3_SPP1_COL25A1_FGF2_FGG_TLL1_CASP3_KLKB1_ADAMTS16_ITGA2_HAPLN1_L…
489656_GO:0004222_metalloendopeptidase_activity	1.08e-08	4e-06	MMEL1_ECE1_ZMPSTE24_TRABD2B_OMA1_ADAM30_ADAMTSL4_ADAM15_ADAMTS4_ADAM17_TRABD2A_ASTL_FAP_OSGEPL1_ADAM23_ECEL1_UQCRC1_ADAMTS9_MME_ECE2_LMLN_ADAMTS3_TLL1_ADAM29_ADAMTS16_ADAMTS12_NLN_ADAMTS19_ADAM19_ADAMTS2_MEP1A_ADAM22_PMPCB_KEL_BMP1_ADAM7_ADAM2_MMP16_PAPPA_ADAMTSL2_PMPCA_PITRM1_YME1L1_ADAMTS14_IDE_TLL2_ADAM12_ADAM8_MMP26_RCE1_MMP13_ADAMTS15_ADAMTS20_MMP19_XRCC6BP1_MMP17_MIPEP_MMP14_ADAM20_PAPLN_AD…	0.00012	MMP23B_MMEL1_ECE1_ZMPSTE24_TRABD2B_OMA1_ADAM30_ADAMTSL4_ADAM15_ADAMTS4_ADAM17_TRABD2A_ASTL_FAP_OSGEPL1_ADAM23_ECEL1_UQCRC1_ADAMTS9_MME_ECE2_LMLN_ADAMTS3_TLL1_ADAM29_ADAMTS16_ADAMTS12_NLN_ADAMTS19_ADAM19_ADAMTS2_MEP1A_ADAM22_PMPCB_KEL_BMP1_ADAM7_ADAM2_MMP16_PAPPA_ADAMTSL2_PMPCA_PITRM1_YME1L1_ADAMTS14_IDE_TLL2_ADAM12_ADAM8_MMP26_RCE1_MMP13_ADAMTS15_ADAMTS20_MMP19_XRCC6BP1_MMP17_MIPEP_MMP14_ADAM20_P…
1268735_R-HSA-5173214_O-glycosylation_of_TSR_domain-containing_proteins	2.79e-08	1e-06	ADAMTSL4_ADAMTS4_THSD7B_ADAMTS9_SEMA5B_SPON2_ADAMTS3_ADAMTS16_SEMA5A_ADAMTS12_ADAMTS6_ADAMTS19_ADAMTS2_THBS2_THSD7A_SSPO_SBSPON_ADAMTSL1_ADAMTSL2_ADAMTS14_SPON1_ADAMTS15_ADAMTS20_THSD1_THBS1_THSD4_ADAMTS7_ADAMTSL3_ADAMTS17_ADAMTS18_ADAMTSL5_ADAMTS10_ADAMTS5_POFUT2	0.0013	ADAMTSL4_ADAMTS4_THSD7B_ADAMTS9_SEMA5B_SPON2_ADAMTS3_ADAMTS16_SEMA5A_ADAMTS12_ADAMTS6_ADAMTS19_ADAMTS2_THBS2_THSD7A_SSPO_SBSPON_ADAMTSL1_ADAMTSL2_ADAMTS14_SPON1_ADAMTS15_ADAMTS20_THSD1_THBS1_THSD4_ADAMTS7_ADAMTSL3_ADAMTS17_ADAMTS18_ADAMTSL5_ADAMTS10_ADAMTS5_POFUT2
516920_GO:0072001_renal_system_development	5.91e-08	2.2e-05	HES5_TP73_CTNNBIP1_WNT4_ID3_HEYL_PCSK9_TACSTD2_HS2ST1_HMGCS2_APH1A_PYGO2_VANGL2_PBX1_ALDH9A1_NPHS2_REN_CD34_CENPF_AGT_NID1_KIF26B_SOX11_ID2_ODC1_OSR1_SDC1_MPV17_SIX2_EPCAM_WDPCP_POU3F3_BCL2L11_PAX8_GLI2_ITGA6_HOXD11_STAT1_CXCR2_WNT6_EPHA4_COL4A3_TRAF3IP1_RARB_ACVR2B_CTNNB1_LAMB2_HYAL2_WNT5A_ROBO2_KLF15_NPHP3_AGTR1_WWTR1_MME_TIPARP_MECOM_ADIPOQ_TP63_HES1_DLG1_WFS1_PROM1_SLIT2_PDGFRA_PPAT_FRAS1_PKD…	0.00013	HES5_TP73_CTNNBIP1_WNT4_ID3_HEYL_PCSK9_TACSTD2_HS2ST1_HMGCS2_APH1A_PYGO2_VANGL2_PBX1_ALDH9A1_NPHS2_REN_CD34_CENPF_AGT_NID1_KIF26B_SOX11_ID2_ODC1_OSR1_SDC1_MPV17_SIX2_EPCAM_WDPCP_POU3F3_BCL2L11_PAX8_GLI2_ITGA6_HOXD11_STAT1_CXCR2_WNT6_EPHA4_COL4A3_TRAF3IP1_RARB_ACVR2B_CTNNB1_LAMB2_HYAL2_WNT5A_ROBO2_KLF15_NPHP3_AGTR1_WWTR1_MME_TIPARP_MECOM_ADIPOQ_TP63_HES1_DLG1_WFS1_PROM1_SLIT2_PDGFRA_PPAT_FRAS1_PKD…
487568_GO:0001655_urogenital_system_development	1.65e-07	3e-05	HES5_TP73_CTNNBIP1_EPHB2_ID3_HEYL_PCSK9_TACSTD2_HS2ST1_WDR77_HMGCS2_APH1A_PYGO2_VANGL2_PBX1_ALDH9A1_NPHS2_REN_CD34_CENPF_AGT_NID1_KIF26B_SOX11_ID2_ODC1_OSR1_SDC1_MPV17_SIX2_EPCAM_WDPCP_POU3F3_BCL2L11_PAX8_GLI2_ITGA6_HOXD11_STAT1_CXCR2_WNT6_EPHA4_COL4A3_TRAF3IP1_RARB_ACVR2B_CTNNB1_SMARCC1_LAMB2_HYAL2_WNT5A_ROBO2_KLF15_GATA2_NPHP3_AGTR1_WWTR1_MME_TIPARP_MECOM_EPHB3_ADIPOQ_TP63_HES1_DLG1_WFS1_PSAPL1…	0.00028	HES5_TP73_CTNNBIP1_EPHB2_ID3_HEYL_PCSK9_TACSTD2_HS2ST1_WDR77_HMGCS2_APH1A_PYGO2_VANGL2_PBX1_ALDH9A1_NPHS2_REN_CD34_CENPF_AGT_NID1_KIF26B_SOX11_ID2_ODC1_OSR1_SDC1_MPV17_SIX2_EPCAM_WDPCP_POU3F3_BCL2L11_PAX8_GLI2_ITGA6_HOXD11_STAT1_CXCR2_WNT6_EPHA4_COL4A3_TRAF3IP1_RARB_ACVR2B_CTNNB1_SMARCC1_LAMB2_HYAL2_WNT5A_ROBO2_KLF15_GATA2_NPHP3_AGTR1_WWTR1_MME_TIPARP_MECOM_EPHB3_ADIPOQ_TP63_HES1_DLG1_WFS1_PSAPL1…
492542_GO:0008201_heparin_binding	2.85e-07	1e-06	RPL22_PLA2G2D_RSPO1_PTPRF_CYR61_TGFBR3_REG4_THBS3_HDGF_SELL_SERPINC1_LAMC2_CFH_PTPRC_PRELP_GREM2_APOB_FBLN7_MSTN_NRP2_FN1_AAMP_SERPINE2_CLEC3B_LTF_RPL29_IMPG2_CCDC80_FSTL1_PCOLCE2_LXN_CHRD_LIPH_KNG1_FGF12_FGFRL1_LRPAP1_FGFBP1_SLIT2_SOD3_ADAMTS3_PF4_CXCL11_CXCL13_COL25A1_NDNF_FGF2_F11_FGF10_THBS4_HBEGF_FGF1_SLIT3_FGFR4_C6orf15_AGER_VEGFA_WISP3_RSPO3_CTGF_LPA_THBS2_GPNMB_PCOLCE_PTN_AOC1_LPL_FGFR1_S…	0.015	RPL22_PLA2G2D_RSPO1_PTPRF_CYR61_TGFBR3_REG4_THBS3_HDGF_SELL_SERPINC1_LAMC2_CFH_PTPRC_PRELP_GREM2_APOB_FBLN7_MSTN_NRP2_FN1_AAMP_SERPINE2_CLEC3B_LTF_RPL29_IMPG2_CCDC80_FSTL1_PCOLCE2_LXN_CHRD_LIPH_KNG1_FGF12_FGFRL1_LRPAP1_FGFBP1_SLIT2_SOD3_ADAMTS3_PF4_CXCL11_CXCL13_COL25A1_NDNF_FGF2_F11_FGF10_THBS4_HBEGF_FGF1_SLIT3_FGFR4_C6orf15_AGER_VEGFA_WISP3_RSPO3_CTGF_LPA_THBS2_GPNMB_PCOLCE_PTN_AOC1_LPL_FGFR1_S…
523_ko05215_Prostate_cancer	2.87e-07	0.00028	PIK3CD_MTOR_CASP9_E2F2_PIK3R3_NRAS_CREB3L4_INSRR_AKT3_SRD5A2_SOS1_TGFA_TCF7L1_CREB1_RAF1_CTNNB1_GSK3B_PIK3CB_PIK3CA_PDGFRA_NFKB1_LEF1_EGF_PDGFC_PIK3R1_TCF7_PDGFRB_E2F3_CDKN1A_HSP90AB1_CREB5_EGFR_PIK3CG_CREB3L2_BRAF_NKX3-1_FGFR1_IKBKB_CCNE2_CREB3_PTEN_CHUK_TCF7L2_FGFR2_HRAS_INS_CREB3L1_BAD_RELA_GSTP1_CCND1_PDGFD_CDKN1B_KRAS_CDK2_MDM2_IGF1_HSP90B1_FOXO1_RB1_NFKBIA_SOS2_HSP90AA1_AKT1_MAP2K1_IGF1R_PD…	5.4e-05	PIK3CD_MTOR_CASP9_E2F2_PIK3R3_NRAS_CREB3L4_INSRR_AKT3_SRD5A2_SOS1_TGFA_TCF7L1_CREB1_RAF1_CTNNB1_GSK3B_PIK3CB_PIK3CA_PDGFRA_NFKB1_LEF1_EGF_PDGFC_PIK3R1_TCF7_PDGFRB_E2F3_CDKN1A_HSP90AB1_PDGFA_CREB5_EGFR_PIK3CG_CREB3L2_BRAF_NKX3-1_FGFR1_IKBKB_CCNE2_CREB3_PTEN_CHUK_TCF7L2_FGFR2_HRAS_INS_CREB3L1_BAD_RELA_GSTP1_CCND1_PDGFD_CDKN1B_KRAS_CDK2_MDM2_IGF1_HSP90B1_FOXO1_RB1_NFKBIA_SOS2_HSP90AA1_AKT1_MAP2K1_IG…
489660_GO:0008237_metallopeptidase_activity	3.35e-07	2.4e-05	MMEL1_ECE1_ZMPSTE24_AGBL4_MYSM1_CLCA4_ADAM30_ADAMTSL4_ADAM15_ADAMTS4_PAPPA2_RNPEP_ADAM17_AGBL5_STAMBP_TRABD2A_ASTL_PSMD14_FAP_METAP1D_OSGEPL1_CPO_DNPEP_ECEL1_RNPEPL1_UQCRC1_ACY1_ADAMTS9_NUDT16_CPA3_MME_ECE2_LMLN_CPZ_LAP3_ADAMTS3_METAP1_ENPEP_TLL1_ADAM29_ADAMTS16_ADAMTS12_NLN_LNPEP_ADAMTS19_ADAM19_ADAMTS2_MEP1A_AMZ1_AEBP1_ADAM22_PMPCB_CPA1_AGBL3_KEL_BMP1_ADAM7_ADAM2_CPA6_MMP16_CPQ_TAF2_ERMP1_ADAMT…	0.00074	MMP23B_MMEL1_ECE1_ZMPSTE24_AGBL4_MYSM1_CLCA4_ADAM30_ADAMTSL4_ADAM15_ADAMTS4_PAPPA2_RNPEP_ADAM17_AGBL5_STAMBP_TRABD2A_ASTL_PSMD14_FAP_METAP1D_OSGEPL1_CPO_DNPEP_ECEL1_RNPEPL1_UQCRC1_ACY1_ADAMTS9_NUDT16_CPA3_MME_ECE2_LMLN_CPZ_LAP3_ADAMTS3_METAP1_ENPEP_TLL1_ADAM29_ADAMTS16_ADAMTS12_NLN_LNPEP_ADAMTS19_ADAM19_ADAMTS2_MEP1A_AMZ1_AEBP1_ADAM22_PMPCB_CPA1_AGBL3_KEL_BMP1_ADAM7_ADAM2_CPA6_MMP16_CPQ_TAF2_ERMP…
487567_GO:0001654_eye_development	4e-07	4.2e-05	HES5_NPHP4_CASZ1_MFN2_EPHA2_MFAP2_EPHB2_CLIC4_ARID1A_PHACTR4_HPCA_COL8A2_FOXE3_JUN_RPE65_BCAR3_OLFM3_GNAT2_WNT2B_HIPK1_NOTCH2_GJA8_PYGO2_NES_ATF6_FASLG_CRB1_CACNA1S_KDM5B_ATP2B4_RD3_PROX1_TGFB2_WNT9A_SOX11_ZNF513_CYP1B1_SOS1_SIX3_EFEMP1_WDPCP_MEIS1_VAX2_SLC4A5_CNGA3_NPHP1_MERTK_RAB3GAP1_GPD2_SP3_NEUROD1_COL5A2_BMPR2_ABI2_CRYGA_IHH_PRSS56_TWIST2_WNT7A_RARB_SLC4A7_TGFBR2_ACVR2B_CTNNB1_LAMB2_GNAT1_W…	0.00051	HES5_NPHP4_CASZ1_MFN2_EPHA2_MFAP2_EPHB2_CLIC4_ARID1A_PHACTR4_HPCA_COL8A2_FOXE3_JUN_RPE65_BCAR3_OLFM3_GNAT2_WNT2B_HIPK1_NOTCH2_GJA8_PYGO2_NES_ATF6_FASLG_CRB1_CACNA1S_KDM5B_ATP2B4_RD3_PROX1_TGFB2_WNT9A_SOX11_ZNF513_CYP1B1_SOS1_SIX3_EFEMP1_WDPCP_MEIS1_VAX2_SLC4A5_CNGA3_NPHP1_MERTK_RAB3GAP1_GPD2_SP3_NEUROD1_COL5A2_BMPR2_ABI2_CRYGA_IHH_PRSS56_TWIST2_WNT7A_RARB_SLC4A7_TGFBR2_ACVR2B_CTNNB1_LAMB2_GNAT1_W…
487718_GO:0001822_kidney_development	4.57e-07	1.9e-05	HES5_TP73_CTNNBIP1_WNT4_ID3_HEYL_PCSK9_TACSTD2_HS2ST1_HMGCS2_APH1A_PYGO2_VANGL2_PBX1_ALDH9A1_NPHS2_REN_CD34_CENPF_AGT_NID1_KIF26B_SOX11_ID2_ODC1_OSR1_SDC1_MPV17_SIX2_EPCAM_WDPCP_POU3F3_BCL2L11_PAX8_GLI2_HOXD11_STAT1_CXCR2_WNT6_EPHA4_COL4A3_TRAF3IP1_RARB_ACVR2B_CTNNB1_LAMB2_HYAL2_ROBO2_KLF15_NPHP3_AGTR1_WWTR1_MME_TIPARP_ADIPOQ_HES1_DLG1_WFS1_PROM1_SLIT2_PDGFRA_PPAT_FRAS1_PKD2_TET2_NPNT_LEF1_ENPEP_…	0.0013	HES5_TP73_CTNNBIP1_WNT4_ID3_HEYL_PCSK9_TACSTD2_HS2ST1_HMGCS2_APH1A_PYGO2_VANGL2_PBX1_ALDH9A1_NPHS2_REN_CD34_CENPF_AGT_NID1_KIF26B_SOX11_ID2_ODC1_OSR1_SDC1_MPV17_SIX2_EPCAM_WDPCP_POU3F3_BCL2L11_PAX8_GLI2_HOXD11_STAT1_CXCR2_WNT6_EPHA4_COL4A3_TRAF3IP1_RARB_ACVR2B_CTNNB1_LAMB2_HYAL2_ROBO2_KLF15_NPHP3_AGTR1_WWTR1_MME_TIPARP_ADIPOQ_HES1_DLG1_WFS1_PROM1_SLIT2_PDGFRA_PPAT_FRAS1_PKD2_TET2_NPNT_LEF1_ENPEP_…
492160_GO:0009887_organ_morphogenesis	4.86e-07	2.8e-05	DVL1_HES5_ERRFI1_MTOR_DHRS3_EPHA2_MFAP2_PAX7_EPHB2_ID3_GRHL3_ARID1A_PHACTR4_MATN1_HDAC1_CSF3R_HEYL_KCNQ4_FOXE3_JUN_RPE65_LHX8_CYR61_HS2ST1_GFI1_BCAR3_OLFM3_COL11A1_RBM15_WNT2B_HIPK1_TBX15_NOTCH2_GJA5_TUFT1_SLC39A1_GBA_MEF2D_VANGL2_DDR2_PBX1_PRRX1_FASLG_PAPPA2_LHX4_UCHL5_LHX9_NR5A2_ELF3_KDM5B_MDM4_FLVCR1_PROX1_TGFB2_HLX_LEFTY1_PSEN2_WNT3A_ACTA1_AGT_EGLN1_RYR2_KIF26B_SOX11_ID2_MYCN_OSR1_GDF7_ASXL2_…	0.00094	DVL1_HES5_ERRFI1_MTOR_DHRS3_EPHA2_MFAP2_PAX7_EPHB2_ID3_GRHL3_ARID1A_PHACTR4_MATN1_HDAC1_CSF3R_HEYL_KCNQ4_FOXE3_JUN_RPE65_LHX8_CYR61_HS2ST1_GFI1_BCAR3_OLFM3_COL11A1_RBM15_WNT2B_HIPK1_TBX15_NOTCH2_GJA5_TUFT1_SLC39A1_GBA_MEF2D_VANGL2_DDR2_PBX1_PRRX1_FASLG_PAPPA2_LHX4_UCHL5_LHX9_NR5A2_ELF3_KDM5B_MDM4_FLVCR1_PROX1_TGFB2_HLX_LEFTY1_PSEN2_WNT3A_ACTA1_AGT_EGLN1_RYR2_KIF26B_SOX11_ID2_MYCN_OSR1_GDF7_ASXL2_…
487440_GO:0001501_skeletal_system_development	5.25e-07	2.6e-05	HES5_DHRS3_EPHA2_PAX7_HSPG2_RUNX3_EXTL1_WASF2_MATN1_COL9A2_PRDX1_TAL1_HSPB11_USP1_SLC35D1_CYR61_COL11A1_ALX3_WNT2B_TRIM45_TBX15_GJA5_SETDB1_SLC39A1_THBS3_BCAN_ADAMTS4_DDR2_PBX1_PRRX1_MYOC_PAPPA2_PTPRC_CACNA1S_PRELP_FLVCR1_TGFB2_MIA3_WNT9A_SOX11_MYCN_OSR1_MATN3_ASXL2_IFT172_SRD5A2_PKDCC_SIX2_MEIS1_CYP26B1_EIF2AK3_ARID5A_INSIG2_EN1_GLI2_ACVR2A_SP5_DLX2_SP3_HOXD1_PRKRA_FRZB_COL5A2_NAB1_SATB2_BMPR2_I…	0.0011	HES5_DHRS3_EPHA2_PAX7_HSPG2_RUNX3_EXTL1_WASF2_MATN1_COL9A2_PRDX1_TAL1_HSPB11_USP1_SLC35D1_CYR61_COL11A1_ALX3_WNT2B_TRIM45_TBX15_GJA5_SETDB1_SLC39A1_THBS3_BCAN_ADAMTS4_DDR2_PBX1_PRRX1_MYOC_PAPPA2_PTPRC_CACNA1S_PRELP_FLVCR1_TGFB2_MIA3_WNT9A_SOX11_MYCN_OSR1_MATN3_ASXL2_IFT172_SRD5A2_PKDCC_SIX2_MEIS1_CYP26B1_EIF2AK3_ARID5A_INSIG2_EN1_GLI2_ACVR2A_SP5_DLX2_SP3_HOXD1_PRKRA_FRZB_COL5A2_NAB1_SATB2_BMPR2_I…
519375_GO:2000736_regulation_of_stem_cell_differentiation	5.3e-07	3.8e-05	HES5_MAD2L2_TRIM62_TAL1_TACSTD2_EFNA1_TGFB2_WNT3A_EIF2AK2_ZFP36L2_TCF7L1_KDM3A_PAX8_EPB41L5_CLASP1_NFE2L2_MSTN_TGFBR2_CLASP2_CTNNB1_DAG1_EPHA3_PHLDB2_GSK3B_H1FOO_WWTR1_HES1_PDGFRA_REST_LEF1_SFRP2_GDNF_DAB2_PPP2CA_NKX2-5_FOXC1_GCNT2_AGER_TEAD3_NFYA_BMP5_HDAC2_TWIST1_SMO_EZH2_GATA4_ZNF703_SFRP1_SDCBP_ZNF706_GLIPR2_TGFBR1_DAB2IP_CRB2_OLFM1_NOTCH1_BAMBI_PBLD_NODAL_C10orf54_PAX2_TCF7L2_TRIM6_SOX6_SDHA…	0.00076	HES5_MAD2L2_TRIM62_TAL1_TACSTD2_EFNA1_TGFB2_WNT3A_EIF2AK2_ZFP36L2_TCF7L1_KDM3A_PAX8_EPB41L5_CLASP1_NFE2L2_MSTN_TGFBR2_CLASP2_CTNNB1_DAG1_EPHA3_PHLDB2_GSK3B_H1FOO_WWTR1_HES1_PDGFRA_REST_LEF1_SFRP2_GDNF_DAB2_PPP2CA_NKX2-5_FOXC1_GCNT2_AGER_TEAD3_NFYA_BMP5_HDAC2_TWIST1_SMO_EZH2_GATA4_ZNF703_SFRP1_SDCBP_ZNF706_GLIPR2_TGFBR1_DAB2IP_CRB2_OLFM1_NOTCH1_BAMBI_PBLD_NODAL_C10orf54_PAX2_TCF7L2_TRIM6_SOX6_SDHA…
	5.5e-07	0.00025	MTOR_ZC3H12A_OLA1_RPSA_SPCS1_SEC61A1_EIF2A_EIF5A2_LETM1_CPEB2_NAA15_RICTOR_ETF1_CPEB4_ABCF1_BAG6_MTRF1L_SBDS_ERI1_LETM2_SEC61B_HSPA5_SEC61A2_EIF5AL1_CPEB3_IGHMBP2_LETMD1_C12orf65_NAA16_OXA1L_EIF2S1_EFTUD1_CPEB1_C1QBP_EIF5A_SLFN14_ICT1_IMPACT_EEF2_EIF3K_EIF6_RPN2_YTHDF1	0.00012	MTOR_ZC3H12A_OLA1_RPSA_SPCS1_SEC61A1_EIF2A_EIF5A2_LETM1_CPEB2_NAA15_RICTOR_ETF1_CPEB4_ABCF1_BAG6_MTRF1L_SBDS_ERI1_LETM2_SEC61B_HSPA5_SEC61A2_EIF5AL1_CPEB3_IGHMBP2_LETMD1_C12orf65_NAA16_OXA1L_EIF2S1_EFTUD1_CPEB1_C1QBP_EIF5A_SLFN14_ICT1_IMPACT_EEF2_EIF3K_EIF6_RPN2_YTHDF1
83111_hsa05215_Prostate_cancer	6.32e-07	0.00029	PIK3CD_MTOR_CASP9_E2F2_PIK3R3_NRAS_CREB3L4_INSRR_AKT3_SRD5A2_SOS1_TGFA_TCF7L1_CREB1_RAF1_CTNNB1_GSK3B_PIK3CB_PIK3CA_PDGFRA_NFKB1_LEF1_EGF_PDGFC_PIK3R1_TCF7_PDGFRB_E2F3_CDKN1A_HSP90AB1_CREB5_EGFR_PIK3CG_CREB3L2_BRAF_NKX3-1_FGFR1_IKBKB_CCNE2_CREB3_PTEN_CHUK_TCF7L2_FGFR2_HRAS_INS_CREB3L1_BAD_RELA_GSTP1_CCND1_PDGFD_CDKN1B_KRAS_CDK2_MDM2_IGF1_HSP90B1_FOXO1_RB1_NFKBIA_SOS2_HSP90AA1_AKT1_MAP2K1_IGF1R_PD…	0.00012	PIK3CD_MTOR_CASP9_E2F2_PIK3R3_NRAS_CREB3L4_INSRR_AKT3_SRD5A2_SOS1_TGFA_TCF7L1_CREB1_RAF1_CTNNB1_GSK3B_PIK3CB_PIK3CA_PDGFRA_NFKB1_LEF1_EGF_PDGFC_PIK3R1_TCF7_PDGFRB_E2F3_CDKN1A_HSP90AB1_PDGFA_CREB5_EGFR_PIK3CG_CREB3L2_BRAF_NKX3-1_FGFR1_IKBKB_CCNE2_CREB3_PTEN_CHUK_TCF7L2_FGFR2_HRAS_INS_CREB3L1_BAD_RELA_GSTP1_CCND1_PDGFD_CDKN1B_KRAS_CDK2_MDM2_IGF1_HSP90B1_FOXO1_RB1_NFKBIA_SOS2_HSP90AA1_AKT1_MAP2K1_IG…
492184_GO:0007423_sensory_organ_development	7.79e-07	7e-05	PRDM16_NPHP4_CASZ1_MFN2_EPHA2_MFAP2_ECE1_EPHB2_CLIC4_ARID1A_PHACTR4_HPCA_COL8A2_KCNQ4_FOXE3_JUN_RPE65_MCOLN3_GFI1_BCAR3_OLFM3_COL11A1_GNAT2_WNT2B_HIPK1_NOTCH2_GJA8_PYGO2_NES_VANGL2_ATF6_PRRX1_FASLG_CRB1_CACNA1S_KDM5B_ATP2B4_MAPKAPK2_RD3_PROX1_USH2A_TGFB2_WNT3A_SOX11_OSR1_ZNF513_CYP1B1_SOS1_SIX2_EFEMP1_WDPCP_MEIS1_ATP6V1B1_CYP26B1_SLC4A5_CNGA3_NPHP1_BCL2L11_MERTK_PAX8_INSIG2_GLI2_RAB3GAP1_GPD2_SP3…	0.00062	PRDM16_NPHP4_CASZ1_MFN2_EPHA2_MFAP2_ECE1_EPHB2_CLIC4_ARID1A_PHACTR4_HPCA_COL8A2_KCNQ4_FOXE3_JUN_RPE65_MCOLN3_GFI1_BCAR3_OLFM3_COL11A1_GNAT2_WNT2B_HIPK1_NOTCH2_GJA8_PYGO2_NES_VANGL2_ATF6_PRRX1_FASLG_CRB1_CACNA1S_KDM5B_ATP2B4_MAPKAPK2_RD3_PROX1_USH2A_TGFB2_WNT3A_SOX11_OSR1_ZNF513_CYP1B1_SOS1_SIX2_EFEMP1_WDPCP_MEIS1_ATP6V1B1_CYP26B1_SLC4A5_CNGA3_NPHP1_BCL2L11_MERTK_PAX8_INSIG2_GLI2_RAB3GAP1_GPD2_SP3…
506148_GO:0043062_extracellular_structure_organization	7.89e-07	2.2e-05	VWA1_PLOD1_MFAP2_HSPG2_SDC3_COL16A1_COL8A2_COL9A2_COL24A1_VCAM1_COL11A1_ITGA10_CTSK_ADAM15_BCAN_NCSTN_ADAMTS4_OLFML2B_DDR2_DPT_TNR_LAMC2_COLGALT2_ELF3_FMOD_LAMB3_TGFB2_MIA3_WNT3A_AGT_EXOC8_NID1_PXDN_ADAM17_SDC1_MPV17_LTBP1_VIT_CYP1B1_FSHR_NRXN1_EFEMP1_BMP10_CAPG_ITGB6_ITGA6_ITGA4_ITGAV_COL5A2_FN1_IHH_COL4A3_COL6A3_FBLN2_CRTAP_ITGA9_KIF9_DAG1_COL8A1_ABI3BP_CD47_CCDC80_ITGB5_COL6A6_NPHP3_PLOD2_APBB…	0.002	VWA1_PLOD1_MFAP2_HSPG2_SDC3_COL16A1_COL8A2_COL9A2_COL24A1_VCAM1_COL11A1_ITGA10_CTSK_ADAM15_BCAN_NCSTN_ADAMTS4_OLFML2B_DDR2_DPT_TNR_LAMC2_COLGALT2_ELF3_FMOD_LAMB3_TGFB2_MIA3_WNT3A_AGT_EXOC8_NID1_PXDN_ADAM17_SDC1_MPV17_LTBP1_VIT_CYP1B1_FSHR_NRXN1_EFEMP1_BMP10_CAPG_ITGB6_ITGA6_ITGA4_ITGAV_COL5A2_FN1_IHH_COL4A3_COL6A3_FBLN2_CRTAP_ITGA9_KIF9_DAG1_COL8A1_ABI3BP_CD47_CCDC80_ITGB5_COL6A6_NPHP3_PLOD2_APBB…
499608_GO:0030198_extracellular_matrix_organization	9.44e-07	2.8e-05	VWA1_PLOD1_MFAP2_HSPG2_SDC3_COL16A1_COL8A2_COL9A2_COL24A1_VCAM1_COL11A1_ITGA10_CTSK_ADAM15_BCAN_NCSTN_ADAMTS4_OLFML2B_DDR2_DPT_TNR_LAMC2_COLGALT2_ELF3_FMOD_LAMB3_TGFB2_MIA3_WNT3A_AGT_EXOC8_NID1_PXDN_ADAM17_SDC1_MPV17_LTBP1_VIT_CYP1B1_FSHR_NRXN1_EFEMP1_BMP10_CAPG_ITGB6_ITGA6_ITGA4_ITGAV_COL5A2_FN1_IHH_COL4A3_COL6A3_FBLN2_CRTAP_ITGA9_KIF9_DAG1_COL8A1_ABI3BP_CD47_CCDC80_ITGB5_COL6A6_PLOD2_APBB2_KDR_…	0.0019	VWA1_PLOD1_MFAP2_HSPG2_SDC3_COL16A1_COL8A2_COL9A2_COL24A1_VCAM1_COL11A1_ITGA10_CTSK_ADAM15_BCAN_NCSTN_ADAMTS4_OLFML2B_DDR2_DPT_TNR_LAMC2_COLGALT2_ELF3_FMOD_LAMB3_TGFB2_MIA3_WNT3A_AGT_EXOC8_NID1_PXDN_ADAM17_SDC1_MPV17_LTBP1_VIT_CYP1B1_FSHR_NRXN1_EFEMP1_BMP10_CAPG_ITGB6_ITGA6_ITGA4_ITGAV_COL5A2_FN1_IHH_COL4A3_COL6A3_FBLN2_CRTAP_ITGA9_KIF9_DAG1_COL8A1_ABI3BP_CD47_CCDC80_ITGB5_COL6A6_PLOD2_APBB2_KDR_…
490635_GO:0005539_glycosaminoglycan_binding	1.61e-06	2e-06	AGRN_RPL22_PLA2G2D_RSPO1_PTPRF_CYR61_TGFBR3_REG4_PGLYRP4_THBS3_HDGF_SELL_SERPINC1_LAMC2_CFH_PTPRC_PRELP_GREM2_NLRP3_APOB_VIT_FBLN7_TNFAIP6_MSTN_NRP2_FN1_AAMP_SERPINE2_TGFBR2_SUSD5_CLEC3B_LTF_HYAL2_STAB1_IMPG2_CCDC80_FSTL1_PODXL2_PCOLCE2_LXN_CHRD_LIPH_KNG1_FGF12_FGFRL1_LRPAP1_FGFBP1_SLIT2_SOD3_ADAMTS3_PF4_CXCL11_CXCL13_COL25A1_NDNF_FGF2_TLR2_SPOCK3_F11_SEMA5A_EGFLAM_FGF10_THBS4_HAPLN1_HBEGF_FGF1_D…	0.047	AGRN_RPL22_PLA2G2D_RSPO1_PTPRF_CYR61_TGFBR3_REG4_PGLYRP4_THBS3_HDGF_SELL_SERPINC1_LAMC2_CFH_PTPRC_PRELP_GREM2_NLRP3_APOB_VIT_FBLN7_TNFAIP6_MSTN_NRP2_FN1_AAMP_SERPINE2_TGFBR2_SUSD5_CLEC3B_LTF_HYAL2_STAB1_IMPG2_CCDC80_FSTL1_PODXL2_PCOLCE2_LXN_CHRD_LIPH_KNG1_FGF12_FGFRL1_LRPAP1_FGFBP1_SLIT2_SOD3_ADAMTS3_PF4_CXCL11_CXCL13_COL25A1_NDNF_FGF2_TLR2_SPOCK3_F11_SEMA5A_EGFLAM_FGF10_THBS4_HAPLN1_HBEGF_FGF1_D…
1268734_R-HSA-5173105_O-linked_glycosylation	1.87e-06	2e-06	ST3GAL3_ST6GALNAC3_ADAMTSL4_MUC1_ADAMTS4_GALNT2_GALNT14_B3GNT2_THSD7B_GALNT13_GALNT5_GALNT3_B3GNT7_GALNT15_ADAMTS9_SEMA5B_MUC13_A4GNT_B3GNT5_ST6GAL1_MUC4_SPON2_MUC7_ADAMTS3_GALNT7_ADAMTS16_SEMA5A_ADAMTS12_ADAMTS6_GCNT4_ADAMTS19_GALNT10_ADAMTS2_MUC21_THBS2_C1GALT1_THSD7A_WBSCR17_MUC17_SSPO_GALNT11_SBSPON_ST3GAL1_ADAMTSL1_GCNT1_GALNT12_ST6GALNAC4_ADAMTSL2_ADAMTS14_MUC5B_GALNT18_SPON1_MUC15_B3GNT6_S…	0.0549	ST3GAL3_ST6GALNAC3_ADAMTSL4_MUC1_ADAMTS4_GALNT2_GALNT14_B3GNT2_THSD7B_GALNT13_GALNT5_GALNT3_B3GNT7_GALNT15_ADAMTS9_SEMA5B_MUC13_A4GNT_B3GNT5_ST6GAL1_MUC4_SPON2_MUC7_ADAMTS3_GALNT7_ADAMTS16_SEMA5A_ADAMTS12_ADAMTS6_GCNT4_ADAMTS19_GALNT10_ADAMTS2_MUC21_THBS2_C1GALT1_THSD7A_WBSCR17_MUC17_SSPO_GALNT11_SBSPON_ST3GAL1_ADAMTSL1_GCNT1_GALNT12_ST6GALNAC4_ADAMTSL2_ADAMTS14_MUC5B_GALNT18_SPON1_MUC15_B3GNT6_S…
137962_wnt_signaling_pathway_Wnt_signaling_network	2.09e-06	0.0065	RSPO1_WNT3A_FZD7_FZD5_WNT7A_WNT5A_RYK_FZD9_FZD1_WNT2_CTHRC1_ROR2_FZD8_DKK1_LRP5_FZD4_LRP6_WNT1_WIF1_FZD10_KREMEN2_IGFBP4_FZD2_WNT3_KREMEN1_WNT7B	1.9e-05	RSPO1_WNT3A_FZD7_FZD5_WNT7A_WNT5A_RYK_FZD9_FZD1_WNT2_CTHRC1_ROR2_FZD8_DKK1_LRP5_FZD4_LRP6_WNT1_WIF1_FZD10_KREMEN2_IGFBP4_FZD2_WNT3_KREMEN1_WNT7B
512112_GO:0051216_cartilage_development	2.54e-06	1e-06	HES5_PAX7_HSPG2_RUNX3_MATN1_BMP8B_CYR61_COL11A1_WNT2B_THBS3_MEF2D_PRRX1_CHI3L1_TGFB2_MIA3_MYCN_OSR1_SIX2_EIF2AK3_ARID5A_GLI2_DLX2_HOXD3_SATB2_BMPR2_IHH_NPPC_GHRL_WNT7A_RARB_TGFBR2_PTH1R_HYAL2_TMEM110-MUSTN1_WNT5A_SHOX2_IFT80_FGFR3_CYTL1_EVC_BMP3_BMPR1B_FGF2_SMAD1_SFRP2_HAND2_GHR_MEF2C_PITX1_SMAD5_HAND1_FGF18_MSX2_BMP6_EDN1_GPLD1_COL11A2_MAPK14_SRF_IL17F_BMP5_COL9A1_COL10A1_CTGF_UNCX_ITGB8_HOXA11_…	0.152	HES5_PAX7_HSPG2_RUNX3_MATN1_BMP8B_CYR61_COL11A1_WNT2B_THBS3_MEF2D_PRRX1_CHI3L1_TGFB2_MIA3_MYCN_OSR1_SIX2_EIF2AK3_ARID5A_GLI2_DLX2_HOXD3_SATB2_BMPR2_IHH_NPPC_GHRL_WNT7A_RARB_TGFBR2_PTH1R_HYAL2_TMEM110-MUSTN1_WNT5A_SHOX2_IFT80_FGFR3_CYTL1_EVC_BMP3_BMPR1B_FGF2_SMAD1_SFRP2_HAND2_GHR_MEF2C_PITX1_SMAD5_HAND1_FGF18_MSX2_BMP6_EDN1_GPLD1_COL11A2_MAPK14_SRF_IL17F_BMP5_COL9A1_COL10A1_CTGF_UNCX_ITGB8_HOXA11_…
506101_GO:0043010_camera-type_eye_development	3.2e-06	0.00027	HES5_NPHP4_CASZ1_MFN2_EPHA2_EPHB2_CLIC4_ARID1A_PHACTR4_HPCA_COL8A2_FOXE3_JUN_RPE65_BCAR3_GNAT2_WNT2B_HIPK1_NOTCH2_GJA8_PYGO2_NES_CACNA1S_KDM5B_ATP2B4_RD3_PROX1_WNT9A_SOX11_ZNF513_CYP1B1_SOS1_SIX3_EFEMP1_WDPCP_MEIS1_VAX2_SLC4A5_CNGA3_NPHP1_MERTK_RAB3GAP1_GPD2_SP3_NEUROD1_BMPR2_ABI2_CRYGA_IHH_PRSS56_TWIST2_WNT7A_RARB_SLC4A7_TGFBR2_ACVR2B_CTNNB1_LAMB2_GNAT1_WNT5A_CCDC66_MITF_ARL6_COL8A1_RPL24_MYH15_…	0.00072	HES5_NPHP4_CASZ1_MFN2_EPHA2_EPHB2_CLIC4_ARID1A_PHACTR4_HPCA_COL8A2_FOXE3_JUN_RPE65_BCAR3_GNAT2_WNT2B_HIPK1_NOTCH2_GJA8_PYGO2_NES_CACNA1S_KDM5B_ATP2B4_RD3_PROX1_WNT9A_SOX11_ZNF513_CYP1B1_SOS1_SIX3_EFEMP1_WDPCP_MEIS1_VAX2_SLC4A5_CNGA3_NPHP1_MERTK_RAB3GAP1_GPD2_SP3_NEUROD1_BMPR2_ABI2_CRYGA_IHH_PRSS56_TWIST2_WNT7A_RARB_SLC4A7_TGFBR2_ACVR2B_CTNNB1_LAMB2_GNAT1_WNT5A_CCDC66_MITF_ARL6_COL8A1_RPL24_MYH15_…
752191_GO:0061448_connective_tissue_development	3.24e-06	1e-06	HES5_PAX7_HSPG2_RUNX3_MATN1_BMP8B_CYR61_COL11A1_CSF1_WNT2B_HMGCS2_RORC_THBS3_MEF2D_PRRX1_CHI3L1_CD34_TGFB2_MIA3_ID2_MYCN_OSR1_SIX2_EIF2AK3_ARID5A_GLI2_DLX2_ATF2_HOXD3_SATB2_BMPR2_IHH_NPPC_GHRL_WNT7A_RARB_TGFBR2_PTH1R_HYAL2_TMEM110-MUSTN1_WNT5A_SHOX2_IFT80_TBL1XR1_PIK3CA_BDH1_FGFR3_CYTL1_EVC_PPARGC1A_BMP3_BMPR1B_FGF2_SMAD1_SFRP2_RXFP1_HAND2_GHR_FOXD1_MEF2C_ARRDC3_PITX1_SMAD5_EGR1_PDGFRB_HAND1_FGF1…	0.197	HES5_PAX7_HSPG2_RUNX3_MATN1_BMP8B_CYR61_COL11A1_CSF1_WNT2B_HMGCS2_RORC_THBS3_MEF2D_PRRX1_CHI3L1_CD34_TGFB2_MIA3_ID2_MYCN_OSR1_SIX2_EIF2AK3_ARID5A_GLI2_DLX2_ATF2_HOXD3_SATB2_BMPR2_IHH_NPPC_GHRL_WNT7A_RARB_TGFBR2_PTH1R_HYAL2_TMEM110-MUSTN1_WNT5A_SHOX2_IFT80_TBL1XR1_PIK3CA_BDH1_FGFR3_CYTL1_EVC_PPARGC1A_BMP3_BMPR1B_FGF2_SMAD1_SFRP2_RXFP1_HAND2_GHR_FOXD1_MEF2C_ARRDC3_PITX1_SMAD5_EGR1_PDGFRB_HAND1_FGF1…
1270245_R-HSA-1474290_Collagen_formation	3.67e-06	0.0015	PLOD1_COL16A1_COL8A2_COL9A2_COL24A1_COL11A1_CTSS_LAMC2_COLGALT2_LAMB3_LOXL3_ITGA6_COL5A2_COL4A3_COL6A3_CRTAP_COL7A1_COL8A1_COL6A6_PCOLCE2_PLOD2_ADAMTS3_COL25A1_TLL1_LOX_ADAMTS2_COL11A2_DST_COL9A1_COL12A1_COL10A1_COL28A1_COL1A2_PCOLCE_COL26A1_CTSB_BMP1_LOXL2_COL14A1_COL22A1_PLEC_CTSL_CTSV_COL15A1_COL27A1_COL5A1_COL13A1_ADAMTS14_TLL2_LOXL4_COL17A1_CD151_SERPINH1_MMP13_COL2A1_COL4A2_PPIB_LOXL1_COL1A…	0.00015	PLOD1_COL16A1_COL8A2_COL9A2_COL24A1_COL11A1_CTSS_LAMC2_COLGALT2_LAMB3_LOXL3_ITGA6_COL5A2_COL4A3_COL6A3_CRTAP_COL7A1_COL8A1_COL6A6_PCOLCE2_PLOD2_ADAMTS3_COL25A1_TLL1_LOX_ADAMTS2_COL11A2_DST_COL9A1_COL12A1_COL10A1_COL28A1_COL1A2_PCOLCE_COL26A1_CTSB_BMP1_LOXL2_COL14A1_COL22A1_PLEC_CTSL_CTSV_COL15A1_COL27A1_COL5A1_COL13A1_ADAMTS14_TLL2_LOXL4_COL17A1_CD151_SERPINH1_MMP13_COL2A1_COL4A2_PPIB_LOXL1_COL1A…
510631_GO:0048566_embryonic_digestive_tract_development	3.97e-06	7e-06	TGFB2_HLX_SOX11_ID2_PKDCC_SIX2_GLI2_IHH_RARB_SHOX2_PDGFRA_CXCL8_PITX2_NIPBL_FGF10_TCF7_FOXF2_TNF_VPS52_TCF21_MYB_GLI3_RARRES2_SHH_GATA4_PCSK5_TCF7L2_FGFR2_SCT_FGF9_ALDH1A2_STRA6_SALL1_FOXF1_HNF1B_OVOL2_ADA	0.035	TGFB2_HLX_SOX11_ID2_PKDCC_SIX2_GLI2_IHH_RARB_SHOX2_PDGFRA_CXCL8_PITX2_NIPBL_FGF10_TCF7_FOXF2_TNF_VPS52_TCF21_MYB_GLI3_RARRES2_SHH_GATA4_PCSK5_TCF7L2_FGFR2_SCT_FGF9_ALDH1A2_STRA6_SALL1_FOXF1_HNF1B_OVOL2_ADA
1270251_R-HSA-1566948_Elastic_fibre_formation	4.26e-06	2.2e-05	MFAP2_TGFB2_LTBP1_EFEMP1_BMP10_LOXL3_LOC100505984_ITGAV_FBLN2_ITGB5_LOX_FBN2_MFAP3_ITGB8_ELN_LOXL2_ITGA8_ITGB1_LOXL4_EFEMP2_ITGA5_BMP4_LTBP2_TGFB3_FBLN5_MFAP1_FBN1_LOXL1_FURIN_MFAP4_VTN_ITGB3_FBN3_LTBP4_TGFB1_BMP2_GDF5_BMP7_FBLN1	0.012	MFAP2_TGFB2_LTBP1_EFEMP1_BMP10_LOXL3_LOC100505984_ITGAV_FBLN2_ITGB5_LOX_FBN2_MFAP3_ITGB8_ELN_LOXL2_ITGA8_ITGB1_LOXL4_EFEMP2_ITGA5_BMP4_LTBP2_TGFB3_FBLN5_MFAP1_FBN1_LOXL1_FURIN_MFAP4_VTN_ITGB3_FBN3_LTBP4_TGFB1_BMP2_GDF5_BMP7_FBLN1
754632_GO:1901681_sulfur_compound_binding	4.29e-06	7e-06	AGRN_CEP104_ACOT7_PLA2G2D_HMGCL_RSPO1_PTPRF_SCP2_ACADM_CYR61_TGFBR3_GSTM3_REG4_THBS3_HDGF_SELL_SERPINC1_SOAT1_ACBD6_LAMC2_CFH_PTPRC_PRELP_CD34_ACBD3_RYR2_GREM2_APOB_HADHB_LRRTM4_ACOXL_FBLN7_DBI_MSTN_NRP2_LANCL1_FN1_AAMP_SERPINE2_GPC1_SLC6A6_HACL1_CLEC3B_LTF_GPX1_RPL29_ACOX2_IMPG2_CCDC80_FSTL1_ACAD9_ACAD11_PCOLCE2_LXN_MCCC1_CHRD_LIPH_KNG1_FGF12_FGFRL1_LRPAP1_ACOX3_FGFBP1_SLIT2_SOD3_ADAMTS3_PF4_CXC…	0.038	AGRN_CEP104_ACOT7_PLA2G2D_HMGCL_RSPO1_PTPRF_SCP2_ACADM_CYR61_TGFBR3_GSTM3_REG4_THBS3_HDGF_SELL_SERPINC1_SOAT1_ACBD6_LAMC2_CFH_PTPRC_PRELP_CD34_ACBD3_RYR2_GREM2_APOB_HADHB_LRRTM4_ACOXL_FBLN7_DBI_MSTN_NRP2_LANCL1_FN1_AAMP_SERPINE2_GPC1_SLC6A6_HACL1_CLEC3B_LTF_GPX1_RPL29_ACOX2_IMPG2_CCDC80_FSTL1_ACAD9_ACAD11_PCOLCE2_LXN_MCCC1_CHRD_LIPH_KNG1_FGF12_FGFRL1_LRPAP1_ACOX3_FGFBP1_SLIT2_SOD3_ADAMTS3_PF4_CXC…
