# Supplementary material for: Genome-wide association meta-analysis of corneal curvature identifies novel loci and shared genetic influences across axial length and refractive error
Source: Commun Biol. 2020 Mar 19;3:133. doi: 10.1038/s42003-020-0802-y (PMC7081241; doi:10.1038/s42003-020-0802-y)
Supplement: Supplementary file 7 — Supplementary Data 5 [file 42003_2020_802_MOESM7_ESM.xlsx]

## Sheet: all CC top genes
Significant pathways enriched for implicated corneal curvature genes using g:Profile
source	term_name	term_id	adjusted_p_value	negative_log10_of_adjusted_p_value	term_size	query_size	intersection_size	effective_domain_size	intersections
GO:BP	animal organ morphogenesis	GO:0009887	0.0108397	1.96498	1004	45	12	17710	MTOR,STIL,IGFBP5,PDGFRA,COL5A1,IGF2,FGF9,FBN1,BMP7,COL6A1,ZNRF3,WNT7B
GO:CC	basement membrane	GO:0005604	0.0198937	1.70128	93	46	4	18709	THBS4,COL5A1,FGF9,FBN1
KEGG	Breast cancer	KEGG:05224	0.0021327	2.67107	147	21	5	7745	MTOR,FRAT1,FRAT2,FGF9,WNT7B
WP	Breast cancer pathway	WP:WP4262	0.0112897	1.94732	155	22	5	6564	MTOR,FRAT1,FRAT2,FGF9,WNT7B
GO:BP	canonical Wnt signaling pathway	GO:0060070	0.0152243	1.81746	287	45	7	17710	RSPO1,SOX2,FRAT1,FRAT2,FGF9,ZNRF3,WNT7B
GO:BP	cartilage development	GO:0051216	0.0282841	1.54846	208	45	6	17710	HMGA2,FGF9,ADAMTS7,BMP7,COL6A1,WNT7B
GO:BP	circulatory system development	GO:0072359	0.0475414	1.32293	1162	45	12	17710	MTOR,STIL,GHSR,PDGFRA,ADAMTS6,THBS4,COL5A1,HMGA2,FGF9,FBN1,BMP7,WNT7B
GO:CC	collagen-containing extracellular matrix	GO:0062023	2.72267e-07	6.56501	369	46	11	18709	FBLN2,ADAMTS3,THBS4,COL5A1,RBP3,KAZALD1,ADAMTS20,FGF9,FBN1,BMP7,COL6A1
GO:BP	connective tissue development	GO:0061448	0.00971874	2.01239	268	45	7	17710	COL5A1,HMGA2,FGF9,ADAMTS7,BMP7,COL6A1,WNT7B
REAC	Defective B3GALTL causes Peters-plus syndrome (PpS)	REAC:R-HSA-5083635	4.62253e-05	4.33512	38	36	5	10658	ADAMTS3,ADAMTS6,ADAMTS19,ADAMTS20,ADAMTS7
GO:BP	developmental process	GO:0032502	0.0456734	1.34034	6309	45	30	17710	MTOR,STIL,USP1,IGFBP5,TNP1,CHRND,HDAC11,GHSR,SOX2,PDGFRA,ADAMTS6,THBS4,NHSL1,HUS1,LMX1B,COL5A1,FRAT2,KAZALD1,IGF2,ADAMTS20,HMGA2,FGF9,STON2,FBN1,ADAMTS7,BMP7,COL6A1,ZNRF3,WNT7B,PRSS56
REAC	Diseases associated with O-glycosylation of proteins	REAC:R-HSA-3906995	0.000768912	3.11412	66	36	5	10658	ADAMTS3,ADAMTS6,ADAMTS19,ADAMTS20,ADAMTS7
REAC	Diseases of glycosylation	REAC:R-HSA-3781865	0.0279965	1.5529	138	36	5	10658	ADAMTS3,ADAMTS6,ADAMTS19,ADAMTS20,ADAMTS7
CORUM	ELN-FBLN2-FBN1 complex	CORUM:6913	0.0150066	1.82372	3	13	2	3632	FBLN2,FBN1
GO:BP	embryo development	GO:0009790	0.00162767	2.78843	1005	45	13	17710	STIL,SOX2,PDGFRA,HUS1,LMX1B,COL5A1,IGF2,HMGA2,FGF9,FBN1,BMP7,COL6A1,WNT7B
GO:BP	embryonic morphogenesis	GO:0048598	0.00039932	3.39868	592	45	11	17710	STIL,SOX2,PDGFRA,COL5A1,IGF2,HMGA2,FGF9,FBN1,BMP7,COL6A1,WNT7B
	endoderm formation	GO:0001706	0.0160211	1.79531	50	45	4	17710	SOX2,COL5A1,HMGA2,COL6A1
GO:BP	endodermal cell differentiation	GO:0035987	0.0104614	1.98041	45	45	4	17710	SOX2,COL5A1,HMGA2,COL6A1
GO:CC	endoplasmic reticulum lumen	GO:0005788	0.0246145	1.60881	306	46	6	18709	IGFBP5,COL5A1,FBN1,ADAMTS7,COL6A1,WNT7B
WP	ESC Pluripotency Pathways	WP:WP3931	0.0487195	1.3123	118	22	4	6564	MTOR,PDGFRA,FGF9,WNT7B
GO:CC	extracellular matrix	GO:0031012	6.50528e-06	5.18673	501	46	11	18709	FBLN2,ADAMTS3,THBS4,COL5A1,RBP3,KAZALD1,ADAMTS20,FGF9,FBN1,BMP7,COL6A1
GO:CC	extracellular matrix component	GO:0044420	0.0490206	1.30962	46	46	3	18709	COL5A1,RBP3,FBN1
GO:BP	extracellular matrix organization	GO:0030198	0.00520638	2.28346	351	45	8	17710	FBLN2,PDGFRA,ADAMTS3,COL5A1,KAZALD1,ADAMTS20,FBN1,COL6A1
GO:BP	extracellular structure organization	GO:0043062	0.0013942	2.85568	405	45	9	17710	FBLN2,PDGFRA,ADAMTS3,COL5A1,KAZALD1,ADAMTS20,FBN1,BMP7,COL6A1
GO:BP	eye development	GO:0001654	0.00590372	2.22887	357	45	8	17710	SOX2,PDGFRA,COL5A1,FGF9,FBN1,BMP7,WNT7B,PRSS56
GO:BP	formation of primary germ layer	GO:0001704	0.0291698	1.53507	122	45	5	17710	SOX2,COL5A1,HMGA2,BMP7,COL6A1
KEGG	Gastric cancer	KEGG:05226	0.00220344	2.6569	148	21	5	7745	MTOR,FRAT1,FRAT2,FGF9,WNT7B
GO:MF	glycosaminoglycan binding	GO:0005539	0.000686453	3.16339	226	45	7	17612	RSPO1,ADAMTS3,THBS4,COL5A1,FGF9,FBN1,BMP7
GO:BP	growth	GO:0040007	0.011759	1.92963	1012	45	12	17710	MTOR,STIL,IGFBP5,CHRND,GHSR,SOX2,KAZALD1,IGF2,HMGA2,FGF9,COL6A1,WNT7B
GO:MF	growth factor binding	GO:0019838	0.0118444	1.92649	139	45	5	17612	IGFBP5,PDGFRA,COL5A1,KAZALD1,COL6A1
GO:MF	heparin binding	GO:0008201	6.95844e-05	4.15749	161	45	7	17612	RSPO1,ADAMTS3,THBS4,COL5A1,FGF9,FBN1,BMP7
GO:MF	metalloendopeptidase activity	GO:0004222	0.0041592	2.38099	112	45	5	17612	ADAMTS3,ADAMTS6,ADAMTS19,ADAMTS20,ADAMTS7
GO:MF	metallopeptidase activity	GO:0008237	0.0498026	1.30275	188	45	5	17612	ADAMTS3,ADAMTS6,ADAMTS19,ADAMTS20,ADAMTS7
GO:BP	multicellular organism development	GO:0007275	0.0236224	1.62668	5416	45	28	17710	MTOR,STIL,USP1,IGFBP5,TNP1,CHRND,HDAC11,GHSR,SOX2,PDGFRA,ADAMTS6,THBS4,HUS1,LMX1B,COL5A1,FRAT2,KAZALD1,IGF2,HMGA2,FGF9,STON2,FBN1,ADAMTS7,BMP7,COL6A1,ZNRF3,WNT7B,PRSS56
REAC	O-glycosylation of TSR domain-containing proteins	REAC:R-HSA-5173214	5.28945e-05	4.27659	39	36	5	10658	ADAMTS3,ADAMTS6,ADAMTS19,ADAMTS20,ADAMTS7
REAC	O-linked glycosylation	REAC:R-HSA-5173105	0.00988491	2.00503	111	36	5	10658	ADAMTS3,ADAMTS6,ADAMTS19,ADAMTS20,ADAMTS7
GO:BP	ossification	GO:0001503	0.0101122	1.99515	384	45	8	17710	IGFBP5,SOX2,KAZALD1,IGF2,FGF9,BMP7,COL6A1,WNT7B
GO:BP	osteoblast differentiation	GO:0001649	0.00218323	2.6609	214	45	7	17710	IGFBP5,SOX2,IGF2,FGF9,BMP7,COL6A1,WNT7B
GO:MF	platelet-derived growth factor binding	GO:0048407	0.00148004	2.82973	12	45	3	17612	PDGFRA,COL5A1,COL6A1
GO:BP	regulation of skeletal muscle hypertrophy	GO:1904204	0.0131526	1.88099	2	45	2	17710	MTOR,IGFBP5
GO:BP	sensory system development	GO:0048880	0.00667904	2.17529	363	45	8	17710	SOX2,PDGFRA,COL5A1,FGF9,FBN1,BMP7,WNT7B,PRSS56
REAC	Signaling by PDGF	REAC:R-HSA-186797	0.012378	1.90735	58	36	4	10658	PDGFRA,THBS4,COL5A1,COL6A1
GO:BP	skeletal muscle hypertrophy	GO:0014734	0.0393939	1.40457	3	45	2	17710	MTOR,IGFBP5
GO:BP	skeletal system development	GO:0001501	0.00111231	2.95378	518	45	10	17710	USP1,PDGFRA,IGF2,HMGA2,FGF9,FBN1,ADAMTS7,BMP7,COL6A1,WNT7B
GO:MF	sulfur compound binding	GO:1901681	0.000995761	3.00184	239	45	7	17612	RSPO1,ADAMTS3,THBS4,COL5A1,FGF9,FBN1,BMP7
GO:BP	tissue morphogenesis	GO:0048729	0.0486432	1.31298	627	45	9	17710	MTOR,STIL,IGFBP5,COL5A1,HMGA2,BMP7,COL6A1,ZNRF3,WNT7B
GO:BP	visual system development	GO:0150063	0.00602734	2.21987	358	45	8	17710	SOX2,PDGFRA,COL5A1,FGF9,FBN1,BMP7,WNT7B,PRSS56
KEGG	Wnt signaling pathway	KEGG:04310	0.00301591	2.52058	158	21	5	7745	RSPO1,FRAT1,FRAT2,ZNRF3,WNT7B

## Sheet: CC genes with effects on SE
Significant pathways enriched for implicated corneal corvature genes with pleiotropic effect on SE using g:Profile
source	term_name	term_id	adjusted_p_value	negative_log10_of_adjusted_p_value	term_size	query_size	intersection_size	effective_domain_size	intersections
GO:MF	insulin-like growth factor binding	GO:0005520	0.0499161	1.30176	28	14	2	18098	KAZALD1,IGFBP5
GO:BP	ossification	GO:0001503	0.0138544	1.85841	395	14	5	17816	KAZALD1,SOX2,FGF9,IGFBP5,WNT7B
GO:BP	osteoblast differentiation	GO:0001649	0.0326897	1.48559	221	14	4	17816	SOX2,FGF9,IGFBP5,WNT7B
GO:BP	negative regulation of multicellular organismal process	GO:0051241	0.0379294	1.42102	1306	14	7	17816	THBS4,RNLS,FBN1,ADAMTS7,SOX2,FGF9,IGFBP5
GO:CC	basement membrane	GO:0005604	0.00574576	2.24065	93	14	3	18797	THBS4,FBN1,FGF9
GO:CC	endoplasmic reticulum lumen	GO:0005788	0.00848773	2.07121	306	14	4	18797	FBN1,ADAMTS7,IGFBP5,WNT7B
GO:CC	collagen-containing extracellular matrix	GO:0062023	0.0243749	1.61306	402	14	4	18797	THBS4,KAZALD1,FBN1,FGF9
