# Supplementary material for: Genome-wide association meta-analysis of corneal curvature identifies novel loci and shared genetic influences across axial length and refractive error
Source: Commun Biol. 2020 Mar 19;3:133. doi: 10.1038/s42003-020-0802-y (PMC7081241; doi:10.1038/s42003-020-0802-y)
Supplement: Supplementary file 8 — Supplementary Data 6 [file 42003_2020_802_MOESM8_ESM.xlsx]

## Sheet: sheet1
	eQTL queries using GTEx gene expression in various tissues
index	SNP	CHR	POS	GENE	A1/A2	Gencode Id	Gene Symbol	Variant Id	P-Value	NES	Tissue
1	rs3737611	1	11186897	MTOR	A/G	171825	EXOSC10	1_11186897_A_G_b37	2.4e-06	0.37	Thyroid
2						171825	EXOSC10	1_11186897_A_G_b37	3.3e-06	0.38	Nerve - Tibial
3						171825	EXOSC10	1_11186897_A_G_b37	5.7e-06	0.36	Artery - Tibial
4	rs77768358	1	11353244	UBIAD1	A/G	No
5	rs4074961	1	38092723	RSPO1	T/C	134698	GNL2	1_38092723_C_T_b37	2.2e-11	0.16	Cells - Transformed fibroblasts
6						163880	DNALI1	1_38092723_C_T_b37	5.1e-11	-0.39	Heart - Left Ventricle
7						163880	DNALI1	1_38092723_C_T_b37	1.3e-08	-0.51	Brain - Cerebellum
8						169219	RSPO1	1_38092723_C_T_b37	8.8e-08	0.23	Artery - Tibial
9						163880	DNALI1	1_38092723_C_T_b37	1.1e-07	-0.24	Muscle - Skeletal
10						163875	MEAF6	1_38092723_C_T_b37	2.3e-07	0.17	Skin - Sun Exposed (Lower leg)
11						163875	MEAF6	1_38092723_C_T_b37	3.9e-07	0.23	Esophagus - Mucosa
12						163880	DNALI1	1_38092723_C_T_b37	4.5e-07	-0.33	Artery - Aorta
13						163875	MEAF6	1_38092723_C_T_b37	4.7e-07	0.17	Skin - Not Sun Exposed (Suprapubic)
14						134698	GNL2	1_38092723_C_T_b37	1.5e-06	-0.37	Brain - Cerebellum
15						163880	DNALI1	1_38092723_C_T_b37	2.8e-06	-0.22	Colon - Transverse
16						163875	MEAF6	1_38092723_C_T_b37	2.9e-06	0.13	Artery - Tibial
						163880	DNALI1	1_38092723_C_T_b37	4.1e-06	-0.23	Esophagus - Muscularis
18						163875	MEAF6	1_38092723_C_T_b37	1e-05	0.19	Adipose - Visceral (Omentum)
19						163875	MEAF6	1_38092723_C_T_b37	1.3e-05	0.22	Heart - Left Ventricle
20						163880	DNALI1	1_38092723_C_T_b37	2.1e-05	-0.2	Nerve - Tibial
21						163880	DNALI1	1_38092723_C_T_b37	3.6e-05	-0.14	Thyroid
23	rs60078183	1	47857307	CMPK1	A/G	No
24	rs945170	1	62867483	USP1	T/G	No
25	rs1548942	2	217619036	IGFBP5/TNP1	T/C	236886	AC007563.5	2_217619036_C_T_b37	7.9e-06	-0.4	Thyroid
26	rs2245601	2	233390937	CHRND/PRSS56	A/G	135902	CHRND	2_233390937_A_G_b37	1.9e-22	0.32	Muscle - Skeletal
27						196812	CHRNG	2_233390937_A_G_b37	6.5e-09	0.22	Muscle - Skeletal
28						237412	PRSS56	2_233390937_A_G_b37	2.2e-06	-0.5	Brain - Cerebellar Hemisphere
29						237412	PRSS56	2_233390937_A_G_b37	7.4e-06	-0.52	Brain - Cerebellum
30						237412	PRSS56	2_233390937_A_G_b37	7.9e-06	-0.41	Brain - Anterior cingulate cortex (BA24)
31						135931	EIF4E2	2_233390937_A_G_b37	8.4e-06	0.27	Heart - Left Ventricle
32						237412	PRSS56	2_233390937_A_G_b37	1.2e-05	-0.42	Brain - Cortex
33	rs2630445	3	13554886	HDAC11/FBLN2	T/G	163517	HDAC11	3_13554886_T_G_b37	3.6e-06	-0.36	Brain - Cortex
34						163521	FBLN2	3_13554886_T_G_b37	5.3e-06	0.23	Nerve - Tibial
35	rs485554	3	172137343	FNDC3B/GHSR	C/G	No
36	rs10663094	3	181363464	SOX2	ACT/A	No
37	rs16896276	4	18015156	LCORL	A/T	163258	DCAF16	4_18015156_T_A_b37	2.3e-10	0.26	Skin - Sun Exposed (Lower leg)
38						163258	DCAF16	4_18015156_T_A_b37	5e-09	0.24	Esophagus - Muscularis
39						163258	DCAF16	4_18015156_T_A_b37	4.7e-08	0.19	Lung
40						163258	DCAF16	4_18015156_T_A_b37	1.3e-07	0.22	Esophagus - Mucosa
41						163258	DCAF16	4_18015156_T_A_b37	1.8e-07	0.19	Artery - Tibial
42						163258	DCAF16	4_18015156_T_A_b37	7.7e-07	0.17	Thyroid
43						163258	DCAF16	4_18015156_T_A_b37	8.2e-07	0.21	Adipose - Subcutaneous
44						163258	DCAF16	4_18015156_T_A_b37	8e-06	0.33	Adrenal Gland
45						163258	DCAF16	4_18015156_T_A_b37	2.2e-05	0.19	Skin - Not Sun Exposed (Suprapubic)
46						163258	DCAF16	4_18015156_T_A_b37	2.9e-05	0.17	Artery - Aorta
47	rs1800813	4	55094467	PDGFRA	A/G	180614	GSX2	4_55094467_G_A_b37	1.5e-05	-0.26	Nerve - Tibial
48	rs7657200	4	73473151	ADAMTS3	A/G	156140	ADAMTS3	4_73473151_G_A_b37	3.2e-09	-0.34	Skin - Not Sun Exposed (Suprapubic)
49						156140	ADAMTS3	4_73473151_G_A_b37	2.9e-05	0.3	Brain - Frontal Cortex (BA9)
50	rs6831679	4	128113424	RP11-125O18.1	A/G	248491	RP11-125O18.1	4_128113424_G_A_b37	6.1e-07	-0.54	Adrenal Gland
51						248491	RP11-125O18.1	4_128113424_G_A_b37	1.5e-06	-0.3	Thyroid
52	rs11740254	5	64319640	CWC27/ADAMTS6	T/C	No
53	rs13180294	5	79360175	THBS4	A/G	No
54	rs7708378	5	129088784	ADAMTS19/CHSY3/MINAR2	T/G	198108	CHSY3	5_129088784_T_G_b37	5.9e-15	0.54	Cells - Transformed fibroblasts
55						198108	CHSY3	5_129088784_T_G_b37	2.6e-06	-0.78	Testis
56	rs67612840	6	10028826	OFCC1	A/T	No
57	rs9366426	6	22064639	CASC15	T/C	No
58	rs961755	6	113443139	U6	T/G	No
59	rs4620141	6	138869568	NHSL1	T/C	135541	NHSL1	6_138869568_C_T_b37	1.9e-18	0.51	Nerve - Tibial
60						135541	NHSL1	6_138869568_C_T_b37	6.4e-17	0.37	Cells - Transformed fibroblasts
61						135541	NHSL1	6_138869568_C_T_b37	5.8e-14	0.42	Esophagus - Muscularis
62						135541	NHSL1	6_138869568_C_T_b37	7.8e-12	0.25	Artery - Tibial
63						135541	NHSL1	6_138869568_C_T_b37	3.5e-09	0.29	Stomach
64						135541	NHSL1	6_138869568_C_T_b37	5.7e-09	0.47	Pancreas
65						135541	NHSL1	6_138869568_C_T_b37	7.4e-07	0.38	Colon - Sigmoid
66						135541	NHSL1	6_138869568_C_T_b37	1.5e-06	0.3	Esophagus - Gastroesophageal Junction
67						135541	NHSL1	6_138869568_C_T_b37	2.4e-06	0.28	Artery - Aorta
68	rs12702376	7	47775053	HUS1	C/G	No
69	rs7004112	8	78941331	RP11-91P17.1	T/G	No
70	rs4837104	9	129433929	LMX1B	A/G	No
71	rs3132309	9	137433436	COL5A1	A/C	No
72	rs11204213	10	48388228	RBP3	T/C	No
73	rs166976	10	90024599	RNLS	A/G	171862	PTEN	10_90024599_G_A_b37	1.7e-13	-0.42	Pancreas
74	rs10786330	10	99074959	FRAT1/ARHGAP19/FRAT2	A/C	213391	ARHGAP19	10_99074959_C_A_b37	5.1e-12	0.26	Skin - Sun Exposed (Lower leg)
75						213391	ARHGAP19	10_99074959_C_A_b37	6.7e-10	0.25	Adipose - Subcutaneous
76						213391	ARHGAP19	10_99074959_C_A_b37	5.6e-09	0.22	Lung
77						181274	FRAT2	10_99074959_C_A_b37	5.7e-09	0.25	Testis
78						171315	PGAM1	10_99074959_C_A_b37	2.2e-08	0.14	Thyroid
79						165880	FRAT1	10_99074959_C_A_b37	5e-08	0.23	Cells - Transformed fibroblasts
80						213391	ARHGAP19	10_99074959_C_A_b37	2.9e-07	0.22	Skin - Not Sun Exposed (Suprapubic)
81						213391	ARHGAP19	10_99074959_C_A_b37	1.2e-06	0.21	Adipose - Visceral (Omentum)
82						213391	ARHGAP19	10_99074959_C_A_b37	1.7e-06	0.19	Thyroid
83						181274	FRAT2	10_99074959_C_A_b37	2.3e-06	0.16	Esophagus - Mucosa
84						213391	ARHGAP19	10_99074959_C_A_b37	2.9e-06	0.26	Heart - Atrial Appendage
85						165880	FRAT1	10_99074959_C_A_b37	4.3e-06	0.2	Heart - Left Ventricle
86						213391	ARHGAP19	10_99074959_C_A_b37	4.4e-06	0.19	Heart - Left Ventricle
87						165880	FRAT1	10_99074959_C_A_b37	7.1e-06	-0.16	Skin - Not Sun Exposed (Suprapubic)
88						213391	ARHGAP19	10_99074959_C_A_b37	1.2e-05	0.16	Artery - Tibial
89						171315	PGAM1	10_99074959_C_A_b37	3.3e-05	0.13	Nerve - Tibial
90						165880	FRAT1	10_99074959_C_A_b37	4.4e-05	-0.15	Artery - Tibial
91						213391	ARHGAP19	10_99074959_C_A_b37	6e-05	0.07	Nerve - Tibial
92	rs807037	10	102824349	KAZALD1	C/G	107820	SFXN3	10_102824349_G_C_b37	3.3e-06	0.14	Artery - Tibial
93						107820	SFXN3	10_102824349_G_C_b37	4.1e-06	0.28	Brain - Cortex
94						107820	SFXN3	10_102824349_G_C_b37	8.2e-06	0.14	Adipose - Subcutaneous
95						107820	SFXN3	10_102824349_G_C_b37	2.2e-05	0.17	Nerve - Tibial
96						107820	SFXN3	10_102824349_G_C_b37	4e-05	0.18	Artery - Aorta
97	rs7948458	11	2172830	IGF2	A/C	No
98	rs11181913	12	43574200	ADAMTS20	A/G	257742	RP11-350F4.2	12_43574200_A_G_b37	2.2e-05	0.41	Pituitary
99	rs7959830	12	66347368	HMGA2	T/G	No
100	rs9506725	13	22314146	FGF9	T/C	No
101	rs9316971	13	22980191	SNORD36	T/C	No
102	rs7327381	13	52006645	INTS6	T/C	No
103	rs75772222	14	25447080	STXBP6	T/C	168952	STXBP6	14_25447080_C_T_b37	9.1e-19	-0.72	Cells - Transformed fibroblasts
104						168952	STXBP6	14_25447080_C_T_b37	2.3e-09	-0.27	Esophagus - Muscularis
105	rs4083463	14	81856323	STON2	A/G	140022	STON2	14_81856323_G_A_b37	8.7e-06	0.19	Artery - Tibial
106						140022	STON2	14_81856323_G_A_b37	4.2e-05	0.16	Adipose - Subcutaneous
107	rs9806595	15	48755168	FBN1	T/C	166148	FBN1	15_48755168_T_C_b37	8.5e-10	-0.34	Whole Blood
108	rs4887113	15	79095287	ADAMTS7	T/C	136378	ADAMTS7	15_79095287_C_T_b37	6.2e-15	0.27	Artery - Tibial
109						261303	RP11-160C18.2	15_79095287_C_T_b37	3.7e-10	-0.24	Muscle - Skeletal
110						136378	ADAMTS7	15_79095287_C_T_b37	8.6e-06	-0.37	Spleen
111	rs184926585	18	32643292	MAPRE2	T/C	166975	MAPRE2	18_32643292_T_C_b37	8.1e-09	0.5	Brain - Cerebellum
112	rs6064518	20	55821046	BMP7	T/G	No
113	rs13050142	21	47427165	COL6A1	T/C	No
